## The Transdiagnostic Connectome Project: a richly phenotyped open dataset for advancing the study of brain-behavior relationships in psychiatry

Sidhant Chopra<sup>\*1,2,3</sup>, Carrisa V. Cocuzza<sup>\*1,2</sup>, Connor Lawhead<sup>\*1,4</sup>, Jocelyn A. Ricard<sup>1,5</sup>, Loïc Labache<sup>1,2</sup>, Lauren M. Patrick<sup>1,6,7</sup>, Poornima Kumar<sup>8,9</sup>, Arielle Rubenstein<sup>1</sup>, Julia Moses<sup>1</sup>, Lia Chen<sup>10</sup>, Crystal Blankenbaker<sup>11</sup>, Bryce Gillis<sup>11,12</sup>, Laura T. Germine<sup>11,12</sup>, Ilan Harpaz-Rote<sup>1,13,14</sup>, BT Thomas Yeo<sup>15-20</sup>, Justin T. Baker<sup>11,12</sup>, Avram J. Holmes<sup>1,2</sup>

1. Department of Psychology, Yale University, New Haven, CT, USA
2. Department of Psychiatry, Brain Health Institute, Rutgers University, Piscataway, NJ, USA
3. Orygen, Center for Youth Mental Health, University of Melbourne, Melbourne, Australia
4. Department of Psychology, Stony Brook University, Stony Brook, NY, USA
5. Stanford Neurosciences Interdepartmental Program, Stanford University School of Medicine, Stanford, CA, USA
6. Department of Psychology, University of Pennsylvania, Philadelphia, PA, USA
7. Department of Psychiatry, Perelman School of Medicine, University of Pennsylvania, Philadelphia, PA, USA
8. Department of Psychiatry, Harvard Medical School, Boston, USA
9. Centre for Depression, Anxiety and Stress Research, McLean Hospital, Boston, USA
10. Department of Psychology, Cornell University, Ithaca, NY, USA
11. Institute for Technology in Psychiatry, McLean Hospital, Boston, USA
12. Department of Psychiatry, Harvard Medical School, Boston, USA
13. Department of Psychiatry, Yale University, New Haven, USA
14. Wu Tsai Institute, Yale University, New Haven, USA
15. Centre for Sleep and Cognition & Centre for Translational Magnetic Resonance Research, Yong Loo Lin School of Medicine, National University of Singapore, Singapore, Singapore
16. Department of Electrical and Computer Engineering, National University of Singapore, Singapore, Singapore
17. N.1 Institute for Health National University of Singapore, Singapore, Singapore
18. Department of Medicine, Human Potential Translational Research Programme & Institute for Digital Medicine (WisDM), Yong Loo Lin School of Medicine, National University of Singapore, Singapore
19. Integrative Sciences and Engineering Programme (ISEP), National University of Singapore, Singapore, Singapore
20. Martinos Center for Biomedical Imaging, Massachusetts General Hospital, Charlestown, USA

**Correspondence:** Avram J. Holmes, Rutgers University, Department of Psychiatry, Brain Health Institute, 119 Staged Research Building, 661 Hoes Lane West, Piscataway, NJ 08854, Email: [avram.holmes@rutgers.edu](mailto:avram.holmes@rutgers.edu).

\* These authors contributed equally to this work.

**Keywords:** Transdiagnostic Connectomes Project (TCP); Open data; Psychiatric Neuroimaging; functional MRI; brain-behavior, cognitive neuroscience

## Abstract

An important aim in psychiatry is the establishment of valid and reliable associations linking profiles of brain functioning to clinically relevant symptoms and behaviors across patient populations. To advance progress in this area, we introduce an open dataset containing behavioral and neuroimaging data from 241 individuals aged 18 to 70, comprising 148 individuals meeting diagnostic criteria for a broad range of psychiatric illnesses and a healthy comparison group of 93 individuals. These data include high-resolution anatomical scans, multiple resting-state, and task-based functional MRI runs. Additionally, participants completed over 50 psychological and cognitive assessments. Here, we detail available behavioral data as well as raw and processed MRI derivatives. Associations between data processing and quality metrics, such as head motion, are reported. Processed data exhibit classic task activation effects and canonical functional network organization. Overall, we provide a comprehensive and analysis-ready transdiagnostic dataset, which we hope will accelerate the identification of illness-relevant features of brain functioning, enabling future discoveries in basic and clinical neuroscience.

## Background & Summary

In recent years, there has been growing interest in establishing how alterations in brain anatomy and function may, at least in part, underpin the onset and maintenance of common psychiatric illnesses. However, progress in understanding these brain-behavior relationships in psychiatry has faced challenges partly due to a lack of open-access clinical cohorts and the restricted sampling of brain function and behavior across patient populations. While developments have been made in both brain-based explanatory and predictive models of clinically relevant behaviors, most of what we currently know about *in vivo* brain functioning comes from studying healthy populations. As such, the increased availability of clinically focused open-access data will facilitate the identification of network function characteristic of symptom-relevant behavioral and cognitive domains.

To date, research on the neurobiological origins of psychiatric illness has primarily focused on discrete illness categories studied in isolation. Although researchers have historically treated patient populations as discrete entities, murky boundaries often exist between nominally distinct diagnostic categories<sup>1-3</sup>. Transdiagnostic data collection efforts provide the unique opportunity to identify symptom and disorder general impairments that may transcend conventional diagnostic boundaries<sup>4,5</sup>. While existing large-scale population neuroscience datasets like the UK Biobank and Human Connectome Project<sup>6</sup> have proven indispensable to foundational research questions in neuroscience, they predominantly consist of individuals without psychiatric illness. This narrow scope restricts the range of measurable behaviors, limiting our capacity to connect the full continuum of functioning to biological and environmental factors, given the incidence of psychiatric diagnoses (approximately 23% of all adults in the United States as of 2021 and a lifetime prevalence of approximately 50% starting in adolescence<sup>7</sup>). We present openly available data from the Transdiagnostic Connectomes Project (TCP) to work towards addressing these shortcomings. The TCP compiles richly phenotyped behavioral and MRI data from individuals

with and without psychiatric diagnoses, covering a broad spectrum of human behavior. This resource provides the opportunity to uncover the neural substrates of illness-relevant behaviors across traditional diagnostic boundaries.

## **Methods**

In this section, we begin by describing recruitment strategies, screening procedures, and overall demographics of TCP participants. We then describe the clinician-administered measures, self-report questionnaires, and cognitive tests all participants completed. Finally, we describe the MRI data, detailing the acquisition parameters for each scan.

### ***Participants***

Between November 2019 and March 2023, 241 participants completed the TCP study at one of two sites within the United States of America: 1) Yale University, Department of Psychology, FAS Brain Imaging Center, located in New Haven, Connecticut and 2) McLean Hospital Brain Imaging Center, located in Belmont, Massachusetts. Participants were recruited from the community via flyers, online advertisements, and patient referrals from participating clinicians. Participants provided written informed consent following guidelines established by the Yale University and McLean Hospital (Partners Healthcare) Institutional Review Boards (See Supplementary Appendix A for representative study consent forms from each site). Participants were eligible for the study if they were 1) 18-65 years old, 2) had no MRI contraindications, 3) were not colorblind, and 4) had no diagnosed neurological abnormalities. All participants underwent a Structured Clinical Interview for DSM-5 (SCID-V-RV) to assess the presence of current or past psychiatric illness. Interviews were conducted by clinical psychologists or trained research assistants who were supervised by qualified clinical psychologists. Research assistants and their clinical supervisors met weekly to discuss interview findings. The final study population included both healthy individuals without a history of illness or treatment and

individuals with a diverse set of clinical presentations, including affective and psychotic psychopathology. A diagnostic and demographic breakdown of study participants is provided in [Fig. 1](#).

After online or phone-based screening, participation in the TCP consisted of three study sessions ([Fig. 1A](#)). Participants completed 1) an in-person clinical, demographic, and health assessment, including a diagnostic interview, clinician-administered scales, and self-report scales (see *Behavioral measurements* for a complete list); 2) an MRI session, including anatomical, resting-state functional and task-based functional neuroimaging (see *MRI data acquisition*), as well as an additional battery of self-report cognitive and behavioral measures; 3) an online cognitive and behavioral assessment, including the TestMyBrain<sup>8</sup> cognitive assessment and a supplemental set of self-report assessments (see *Behavioral measurements* for a complete list).

### (a) Transdiagnostic Connectome Project (TCP): study outline

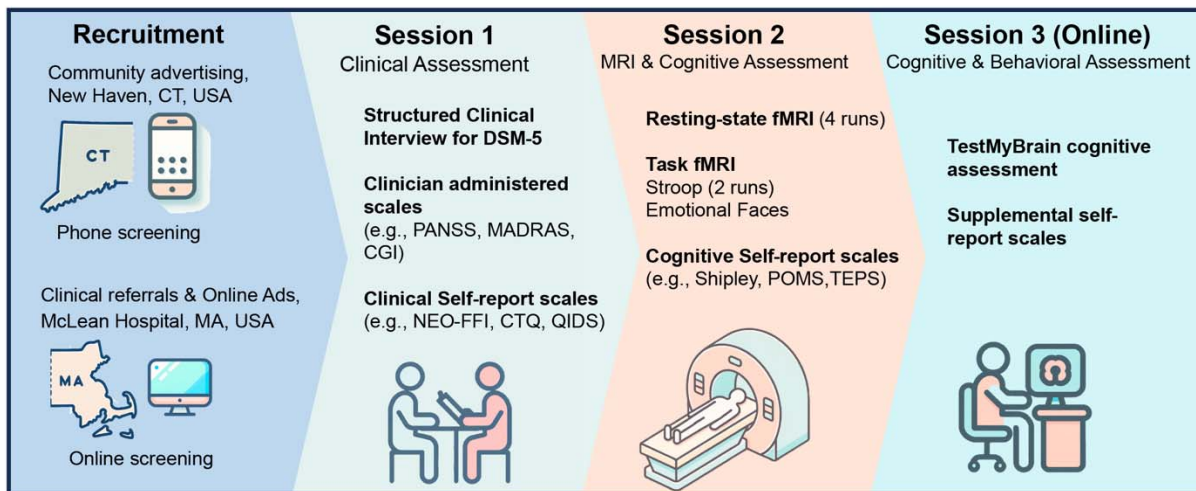

### (b) Diagnosis

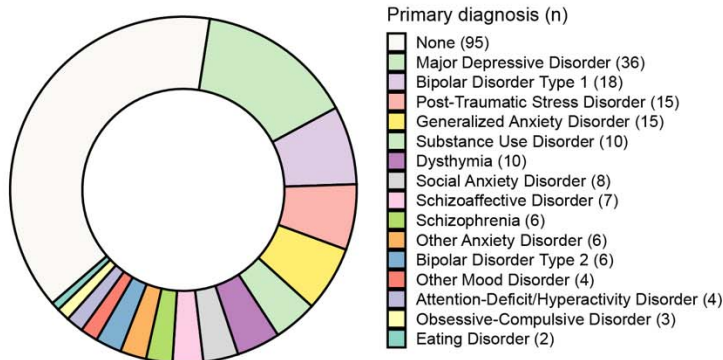

### (c) Site, age, and sex

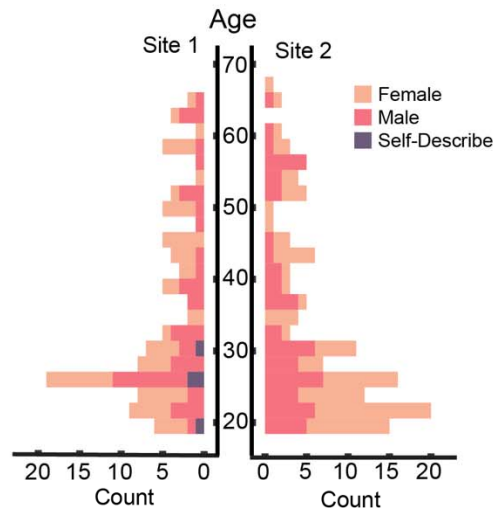

### (d) Place of birth

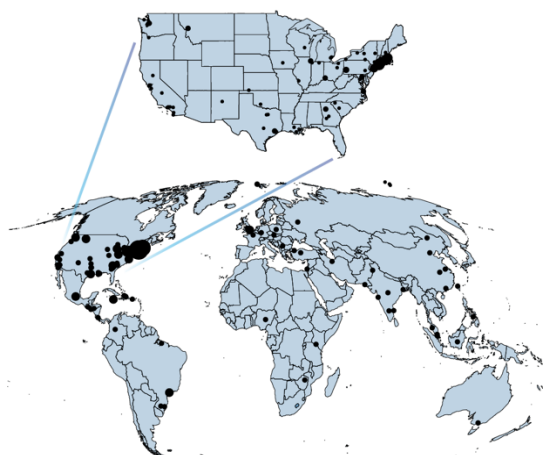

### (e) Race and ethnicity

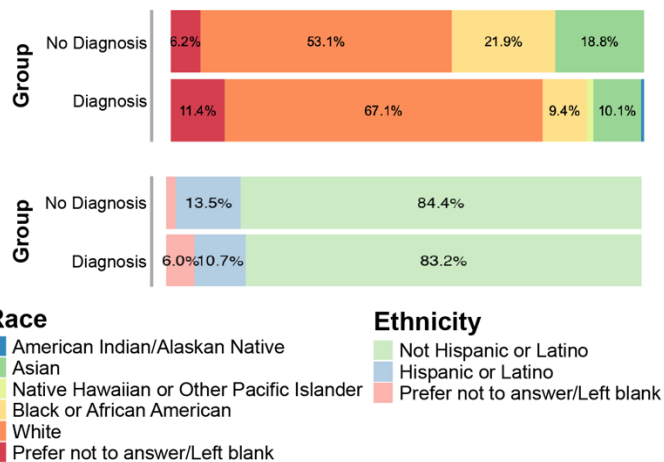

**Figure 1. Overview of the Transdiagnostic Connectome Project (TCP).** (a) Schematic representation of the Transdiagnostic Connectomes project, illustrating the recruitment of participants across two sites. Participants underwent three assessment sessions, including in-person clinician evaluations, self-report measures, neuroimaging, and online cognitive and self-report assessments. (b) Breakdown of primary mental health diagnoses for each individual based on the Structured Clinical Interview for DSM-5 (SCID-V-RV) criteria. (c) Bar chart displaying age distributions across the two sites, with bars colored based on the proportion of self-reported sex within each age bracket. (d) Geographic distribution of TCP participants' place of birth. The dot size represents the number of participants from each location, with a world map at the bottom and an enlarged map of the United States of America on top. (e) Distribution of race and ethnicity according to National Institute of Health criteria, categorized for individuals with and without a mental health diagnosis.

### ***MRI data acquisition***

MRI data were acquired at both sites using harmonized Siemens Magnetom 3T Prisma MRI scanners and a 64-channel head coil. T1-weighted (T1-w) anatomical images were acquired using a multi-echo MPRAGE sequence following parameters: acquisition duration of 132 seconds, with a repetition time (TR) of 2.2 seconds, echo times (TE) of 1.5, 3.4, 5.2, and 7.0 milliseconds, a flip angle of 7°, an inversion time (TI) of 1.1 seconds, a sagittal orientation and anterior (A) to posterior (P) phase encoding. The slice thickness was 1.2 millimeters, and 144 slices were acquired. The image resolution was 1.2 mm<sup>3</sup>. A root mean square of the four images corresponding to each echo was computed to derive a single image. T2-weighted (T2-w) anatomical images with the following parameters: TR of 2800 milliseconds, TE of 326 milliseconds, a sagittal orientation, and AP phase encoding direction. The slice thickness was 1.2 millimeters, and 144 slices were acquired.

All seven functional MRI runs were acquired with the same parameters matching the HCP protocol<sup>6,9</sup>, varying only the conditions (rest/task) and separately acquired phase encoding directions (AP/PA). For the resting-state, Stroop task, and Emotional Faces task, a total of 488, 510, and 493 volumes were acquired, respectively, all using the following MRI sequence parameters: TR = 800 milliseconds, TE = 37 milliseconds, flip angle = 52°, and voxel size = 2mm<sup>3</sup>. A multi-band acceleration factor of 8 was applied. An auto-align pulse sequence protocol was used to align the acquisition slices of the functional scans parallel to the anterior

commissure-posterior commissure (AC-PC) plane of the MPRAGE and centered on the brain. To enable the correction of the distortions in the EPI images, B0-field maps were acquired in both AP and PA directions with a standard Spin Echo sequence. Detailed MRI acquisition protocols for both sites are available in Appendix B. In total, four resting-state (2×AP, 2×PA), 2 Stroop task acquisitions (1×AP, 1×PA), and 1 Emotional Faces task acquisition<sup>10</sup> (1×AP) acquisitions were collected. Select participants out of the total sample did not complete each functional neuroimaging run; thus the sample sizes for each run were as follows: resting-state AP run 1,  $n = 241$ ; resting-state PA run 1,  $n = 241$ ; resting-state AP run 2,  $n = 237$ ; resting-state AP run 2,  $n = 235$ ; Stroop task AP,  $n = 226$ ; Stroop task PA,  $n = 224$ ; and Emotional Faces task AP,  $n = 226$ .

### ***Task fMRI paradigms***

We collected functional MRI data while participants engaged in two tasks: 1) the Stroop task and 2) the Emotional Faces task. [Fig. 2](#) shows the two task paradigms, including timing specifications for fixation periods, trial durations, inter-stimulus intervals, and response collection methods. In all task fMRI runs, stimuli were presented using the PsychoPy presentation software<sup>11</sup> and projected onto a screen viewed through a mirror mounted atop the MRI scanner's head coil.

The Stroop task is a classical experimental manipulation of cognitive control—specifically, the ability to inhibit automatic responses when presented with conflicting information to accomplish a given task goal and/or context<sup>12-17</sup>. During the task, participants were presented with various color name words (e.g., red, blue, and green) that were shown in various “ink” colors (i.e., font colors) and asked to identify the color of the ink ([Fig. 2A](#)). If the ink and the written word matched (e.g., “red” shown in red font), this was a congruent trial and is relatively easy and fast to identify. However, if the ink and the written word did not match (e.g., “red” shown in blue font),



this was an incongruent trial and is more difficult and slower to identify. This is known as the “Stroop effect” (or “Stroop interference”) and is quantified via reduced accuracy and slower reaction time on incongruent versus congruent trials. The Stroop effect is generally more pronounced (i.e., larger accuracy and reaction time differences between conditions) when a participant has lower inhibitory cognitive control or difficulty recruiting the neurocognitive resources needed to process conflicting information accurately<sup>18</sup>. Resolving interference in an experimentally manipulated context is thought to capture the extent to which one can deploy cognitive flexibility and/or selective attention in everyday life<sup>19-21</sup>. The Stroop effect has been investigated using various task adaptations in a variety of clinical research programs, including studies of psychotic<sup>22-25</sup>, attentional<sup>26-29</sup>, mood<sup>30-32</sup>, and substance use disorders<sup>33-35</sup>. Additionally, cognitive control is negatively impacted across a large number of psychiatric disorders<sup>36-39</sup>. Therefore, behavioral performance and neurocognitive processes exhibited while performing the Stroop task are well-suited to the transdiagnostic research questions addressable with the TCP dataset.

The Emotional Faces task<sup>10</sup> is also a widely implemented task paradigm in neuroimaging. Participants were presented with images of human faces or geometric shapes and asked to categorize stimuli as either faces or shapes ([Fig. 2B](#)). Trials that showed pictures of human faces included people with neutral, positive (e.g., happy), and negative emotional expressions (e.g., anger) taken from the NimStim database of face stimuli<sup>40</sup>; trials showing shapes included ovals with different orientations. Three images were arranged in a triangle, and participants were instructed to indicate which of the two bottom shapes or faces matched the shape or face at the top of the screen. This task is relatively easy; therefore, behavioral performance is not typically of central interest. Instead, this task paradigm reliably elicits a response within regions of the amygdala during emotional face relative to shape trials and can provide neuroimaging studies with 1) essential benchmarking using a well-established task activation and 2) an entry

point for neuroscience research questions on affective processing. The latter is an important consideration for transdiagnostic research, given that a variety of psychiatric conditions are known to involve dysregulated processing of emotions and deficits in social cognition. These topics have been examined using the Emotional Faces task in studies of autism spectrum disorder<sup>41,42</sup>, anxiety disorders<sup>43,44</sup>, post-traumatic stress disorder<sup>45</sup>, psychotic disorders<sup>46</sup>, psychopathy<sup>47</sup>, and those exhibiting social phobia<sup>48</sup>.

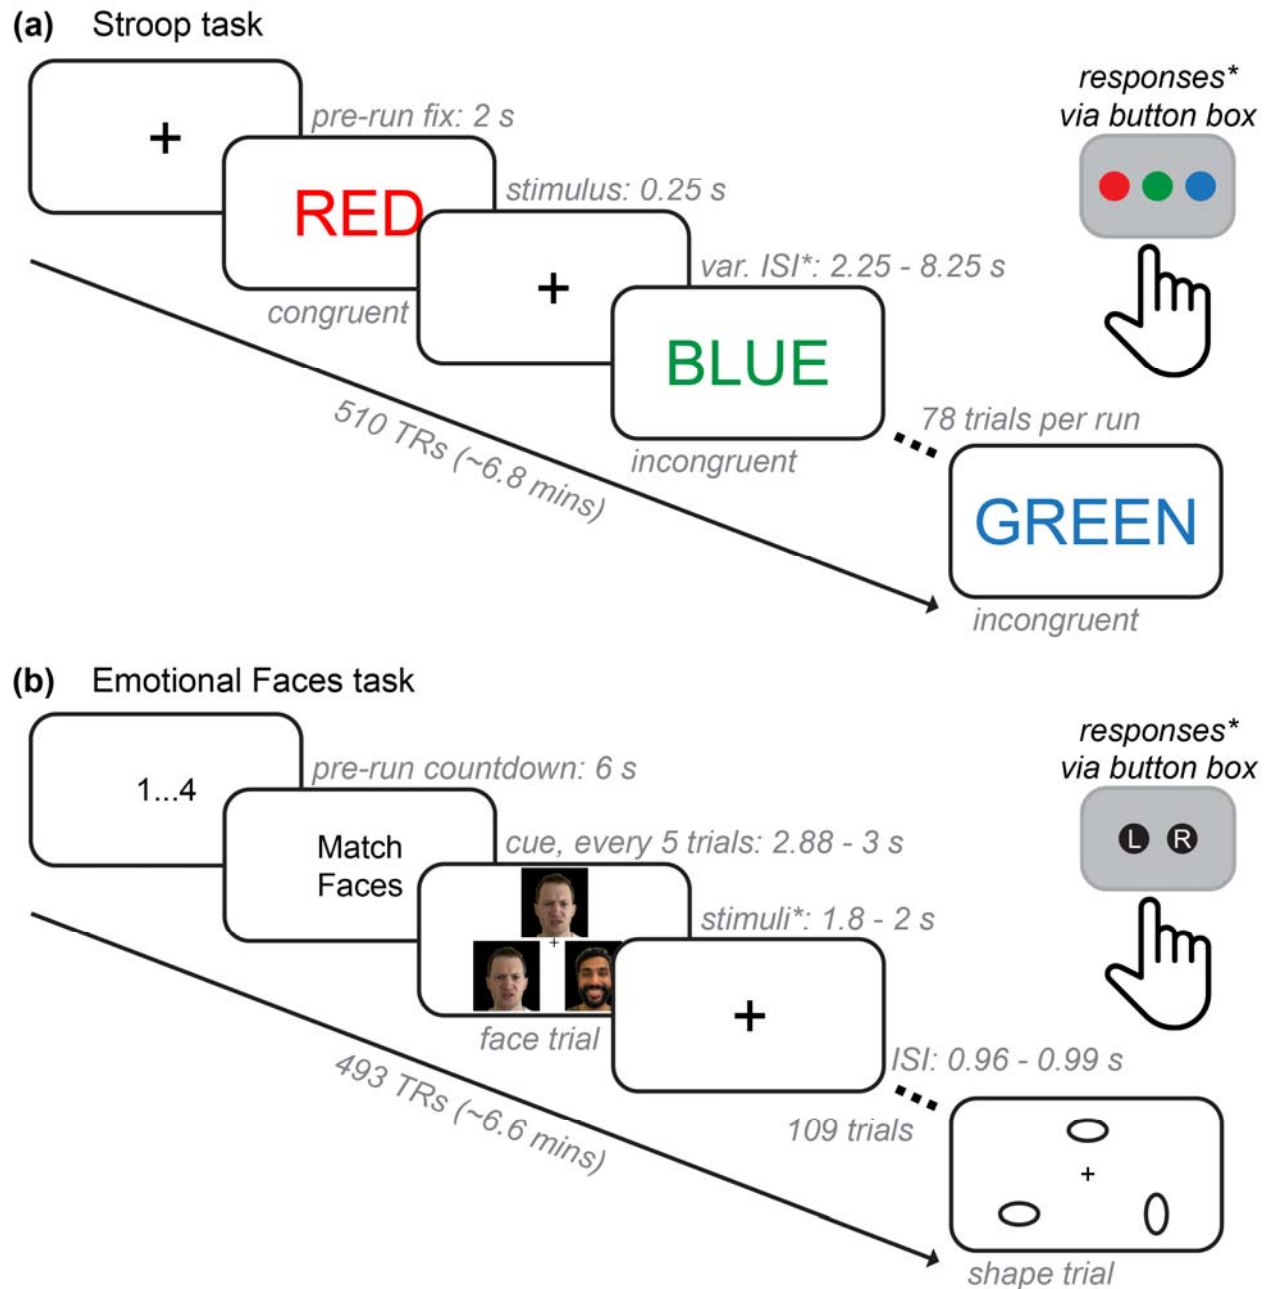

**Figure 2 - Functional neuroimaging task paradigms. (a)** The Stroop task paradigm. For each functional run (2 total: AP and PA), an initial fixation (2 s) was followed by the presentation of color name words (red, green, or blue) in either congruent or incongruent ink color. Participants were given a button box with three buttons that were pre-mapped to record responses as either red, green, or blue and were told to identify the color of the ink on each trial. Stimuli were presented for 250 ms, and responses were allowed within the variable interstimulus interval (var. ISI; response periods denoted by asterisks), which included a range of 2.25 through 8.25 s. There were three congruent trial types, shown for about 70% of trials (18 each), and six incongruent trial types, shown for about 30% of trials (4 each). There were 78 trials for each functional run, each approximately 6.8 minutes (or 510 TRs at 0.8 s each) in total. **(b)** The Emotional Faces task paradigm. There was an initial countdown of four screens showing 1 to 4 in consecutive order (6s total). Then, every six trials showed a cue that either said “Match Faces” or “Match Shapes”. Participants were given a button box with two pre-mapped buttons that recorded responses as

either “left” or “right” and were told to choose which of the two (left or right) of the bottom images matched the top image in the triangle. Stimuli were presented for 1.8 through 2 s, and there was an ISI fixation between each trial. Feedback plus ISI was approximately 1 s per trial. Each of the faces and shapes trial types were shown in equal amounts (50% of trials each). There were 109 trials altogether, which lasted a total of 6.6 minutes (493 TRs). Note that some components of these figures have been slightly modified from their original presentation form for ease of visualization and to protect the privacy of the original models; the face stimuli shown are photographs of authors of this manuscript meant to be representative, but not exact matches, of the original images used in the experiment. We confirm that all authors consented to the inclusion of their photographs in the manuscript for public dissemination.

### ***Behavioral measurements***

Table 1 lists the entire battery of assessments across the three testing sessions. The selected measures index a broad range of functional, lifestyle, emotional, mental health, cognitive, environmental, personality, and social factors. These assessments include multiple commonly used clinical tools such as the Montgomery-Åsberg Depression Rating Scale (MADRS<sup>49</sup>), Depression Anxiety Stress Scale (DASS<sup>50</sup>), Positive and Negative Syndrome Scale (PANSS<sup>51</sup>), and Young Mania Rating Scale (YMRS<sup>52</sup>), as well as scales that capture distinctive aspects of experiences such as Temperament and Character Inventory<sup>53</sup>, Temporal Experience of Pleasure Scale<sup>54</sup>, Experience in Close Relationship Scale<sup>55</sup>, and the Positive Urgency Measure<sup>56</sup>. The dataset also includes common measures of cognition, including the Shipley Vocabulary Test<sup>57</sup> and the TestMyBrain suite<sup>8</sup>, including matrix reasoning, as well as self-report measures such as Cognitive Emotion Regulation Questionnaire<sup>58</sup>, Cognitive Failures Questionnaire<sup>59</sup> and Cognitive Reflection Test<sup>60</sup>. Item-level participant responses are available for download (see *Data Records*). The associated distributions, missingness, means, medians, and standard deviation for the total sample for all scales and subscales are provided in [Supplement Table 1](#).

*Table 1. List of all behavioral assessments.*

| <b>Session 1 (Clinical Assessment)</b>           | <b>Short Name</b> | <b>Reference</b>                 |
|--------------------------------------------------|-------------------|----------------------------------|
| SCID-5: Structured Clinical Interview for DSM-5* | SCID-5            | First et al., 2015 <sup>61</sup> |
| Health and demographics questionnaire*           | n/a               | n/a                              |
| Anxiety Symptom Chronicity*                      | ASC               | n/a                              |

|                                                     |                   |                                                                |
|-----------------------------------------------------|-------------------|----------------------------------------------------------------|
| Clinical Global Impression*                         | CGI               | Busner & Targum, 2007 <sup>62</sup>                            |
| Columbia Suicide Severity Rating Scale*             | CSSRS-I           | Posner et al., 2011 <sup>63</sup>                              |
| Range of Impaired Functioning Tool*                 | LIFT-RIFT         | Leon et al., 1999 <sup>64</sup>                                |
| Montgomery-Asberg Depression Rating Scale*          | MADRS             | Davidson et al., 1986 <sup>49</sup>                            |
| Multnomah Community Ability Scale                   | MCAS              | Hendryx et al., 2001 <sup>65</sup>                             |
| Positive and Negative Syndrome Scale*               | PANSS             | Kay et al., 1987 <sup>51</sup>                                 |
| Panic Disorder Severity Scale*                      | PDSS              | Shear et al., 2006 <sup>66</sup>                               |
| Young Mania Rating Scale*                           | YMRS              | Young et al., 1978 <sup>52</sup>                               |
| Alcohol Tobacco Caffeine Use Questionnaire          | ATC               | Istvan & Matarazzo, 1984 <sup>67</sup>                         |
| Broad Autism Phenotype Questionnaire                | BAPQ-2            | Hurley et al., 2006 <sup>68</sup>                              |
| Barratt Impulsiveness Scale                         | BIS               | Patton et al., 1995 <sup>69</sup>                              |
| Behavioral Inhibition/Activation Scale              | BISBAS            | Carver & White, 1994 <sup>70</sup>                             |
| Childhood Trauma Questionnaire                      | CTQ               | Pennebaker & Susman, 1988 <sup>71</sup>                        |
| Domain Specific Risk Taking                         | DOSPERT           | Weber et al., 2002 <sup>72</sup>                               |
| Fagerstrom Test for Nicotine Dependence             | FNTD              | Radzius et al., 2003 <sup>73</sup>                             |
| Multidimensional Scale for Perceived Social Support | MSPSS             | Zimet et al., 1988 <sup>74</sup>                               |
| NEO Five-Factor Inventory                           | NEO-FFI           | Costa & McCrae, 2003 <sup>75</sup>                             |
| Quick Inventory of Depressive Symptomatology        | QIDS              | Rush et al., 2003 <sup>76</sup>                                |
| State-Trait Anxiety Inventory                       | STAIY             | Spielberger 1983 <sup>77</sup>                                 |
| Temperament Character Inventory                     | TCI               | Cloninger 1987 <sup>53</sup>                                   |
| <hr/>                                               |                   |                                                                |
| <b>Session 2 (MRI Assessment)</b>                   | <b>Short Name</b> | <b>Reference</b>                                               |
| Anxiety Sensitivity Index                           | ASI               | Reiss et al., 1986 <sup>78</sup>                               |
| Depression Anxiety Stress Scale                     | DASS              | Lovibond & Lovibond, 1995 <sup>50</sup>                        |
| Profile of Mood States                              | POMS              | McNair et al., 1981 <sup>79</sup>                              |
| Perceived Stress Scale                              | PSS               | Cohen et al., 1983 <sup>80</sup>                               |
| Shiplely Institute of Living Scale                  | Shiplely          | Shiplely 1967 <sup>81</sup>                                    |
| Temporal Experience of Pleasure Scale               | TEPS              | Gard et al., 2006 <sup>54</sup>                                |
| Stroop task †                                       | Stroop            | Stroop 1935 <sup>12</sup> ; MacLeod 1991 <sup>16</sup>         |
| Emotional Faces Task †                              | Emo. Faces        | Hariri 2002 <sup>10</sup> ; DeKosky et al., 1980 <sup>82</sup> |
| <hr/>                                               |                   |                                                                |
| <b>Session 3 (Online Assessment)</b>                | <b>Short Name</b> | <b>Reference</b>                                               |
| Cognitive Emotion Regulation Questionnaire          | CERQ              | Garnefski & Kraaij, 2007 <sup>58</sup>                         |

|                                              |       |                                      |
|----------------------------------------------|-------|--------------------------------------|
| Cognitive Failures Questionnaire             | CFQ   | Broadbent et al., 1982 <sup>59</sup> |
| Cognitive Reflections Test                   | CRT   | Frederick, 2005 <sup>60</sup>        |
| Experiences in Close Relationships Inventory | ECRR  | Brennan et al., 1998 <sup>55</sup>   |
| Positive Urgency Measure                     | PUM   | Cyders et al., 2007 <sup>56</sup>    |
| Ruminative Responses Scale                   | RRS   | Treynor et al., 2003 <sup>83</sup>   |
| Retrospective Self-Report of Inhibition      | RSRI  | Reznick et al., 1991 <sup>84</sup>   |
| Snaith-Hamilton Pleasure Scale               | SHAPS | Snaith et al., 1995 <sup>85</sup>    |
| Test My Brain                                | TMB   | Passell et al., 2019 <sup>8</sup>    |

---

\* Indicates that the assessment was administered by a clinician rather than self-reported.

† Indicates that the assessment occurred within the MRI scanner.

Not applicable indicated by n/a.

## Data Records

Raw neuroimaging and behavioral data can be accessed via OpenNeuro: <https://openneuro.org/datasets/ds005237>. Additionally, raw and processed data can be accessed via the National Institute of Mental Health Data Archive (NDA) data repository ([https://nda.nih.gov/edit\\_collection.html?id=3552](https://nda.nih.gov/edit_collection.html?id=3552)) upon publication. The dataset is released as part of *Open Access Permission*, has been consented for broad research use, and can be accessed by users who are not affiliated with an NIH-recognized research institution. Note that 5 participants did not grant permission to share their data via openly online-hosted repositories and are excluded from this release.

Raw MRI data have undergone DICOM to NifTI conversion using *dcm2nii*<sup>86</sup> and are provided in BIDS-compliant<sup>87</sup> format. BIDS organizes data into a standardized file, folder and naming structure. Imaging data for each participant is stored in folders named according to the assigned Global Unique Identifier (GUID), an alphanumeric code created by the NDA GUID Tool. For BIDS data uploaded to OpenNeuro, a 'sub-' prefix was added to subject folders and filenames. Each participant folder contains an '*anat*' subfolder containing T1-w and T2-w images, a '*func*' subfolder containing all runs of functional data as well as event files for task runs, and a '*fmap*'

subfolder containing the field maps. Each image and event file has a corresponding *.json* file that contains relevant meta-data. All anatomical images were defaced prior to uploading on the NDA using the *face\_removal\_mask* function from the R library *fslr*<sup>88</sup> (R package version: 2.52.2, R version: 4.3.0), which is a wrapper library of FSL<sup>89</sup> (version 6.0.5.1). The *face\_removal\_mask* function is an R implementation of the Python package *pydeface*<sup>90</sup>. The demographic and behavioral data are available as *.csv* files, with a separate file for each scale and a corresponding NDA-conformant dictionary delineating available data fields.

To facilitate the use of the TCP data, in addition to raw BIDS formatted data, we provide both raw data and processed derivatives according to the HCP processing pipelines (version 4.7.0, see *Human Connectome Project minimal processing* below for details) on the NDA, including anatomical surfaces, as well as minimally processed and denoised functional timeseries in both densely sampled surface space and standard volumetric space. A full list of HCP-related derivatives can be found at: <https://www.humanconnectome.org/study/hcp-young-adult/document/1200-subjects-data-release>. We additionally provide analysis-ready functional connectivity matrices using cortical, subcortical, and cerebellar regions. The processing and denoising pipeline, and quality control procedures are described below in *Technical Validation*.

## Technical Validation

In this section, we first describe the processing and denoising pipeline used for the MRI data. Next, we benchmark this process by examining 1) the residual relationship between in-scanner movement and functional connectivity before and after denoising, 2) the effect of region-to-region distance on this residual relationship, and 3) the number of statistically significant associations between head motion and functional connectivity. Subsequently, we explore the presence of group-level canonical functional network structures and assess the similarity of

these structures across different fMRI runs. Additionally, we report commonly computed network diagnostics<sup>91</sup> given by graph theory, canonical task-based fMRI activation contrasts, and behavioral outcomes from in-scanner tasks. Finally, we examine correlation patterns across behavioral scales and subscales for diagnosed and non-diagnosed individuals and investigate latent behavioral structures using dimensionality reduction. All processing and analyses reported below, except differences in behavioral measures reported in [Fig. 7](#) and [Fig. 8](#), are conducted on the entire sample and do not differentiate between those with and without a diagnosis.

### ***Human Connectome Project minimal processing***

MRI data were minimally processed and denoised via the Human Connectome Project (HCP) pipelines<sup>92</sup>, version 4.7.0 (<https://github.com/Washington-University/HCPpipelines>). Broadly, this includes: 1) FreeSurfer structural MRI processing, 2) functional MRI volume processing, 3) functional MRI surface processing, 4) denoising via ICA-FIX, 5) “multimodal surface matching” registration (MSMAll<sup>93</sup>), and 6) de-drifting, resampling, and applying the MSMAll registration. Tools implemented by HCP pipelines are mainly adapted from the FMRIB Software Library (FSL) and FreeSurfer<sup>94</sup>, to improve the spatiotemporal accuracy of MRI data, particularly with acquisition advancements such as multiband acceleration<sup>92,95,96</sup>.

In brief, anatomical T1w/T2w images were used to create MNI-aligned structural volumes in each participant’s native space. These images were corrected for gradient nonlinearities and magnetic field inhomogeneities and reconstructed into segmented brain structures. Folding-based surface registration to the standard FreeSurfer atlas (i.e., *fsaverage*) and to the high-resolution Conte69 atlas<sup>97</sup> was followed by downsampling to various spatial resolutions (2 mm used herein). fMRI volume processing steps further corrected for spatial distortions and implemented motion correction, bias field correction, and normalization. Motion correction was



implemented via FLIRT registration of individual frames to a single-band reference image. In HCP-style, we provide motion parameters in separate files to characterize x/y/z translation, rotation, and their derivatives, as well as demeaned and detrended versions of each (24 parameters total), which may be used for nuisance regression (see *fMRI denoising*). Echo planar distortions were corrected by FSL's "topup"<sup>98,99</sup> using spin echo field maps that were acquired in the opposite phase encoding directions of each scan.

fMRI surface processing steps transformed 4D volumetric timeseries into 2D surface-based timeseries that were registered to a standard set of grayordinates across all participants. This involved HCP's "partial volume weighted ribbon-constrained volume-to-surface mapping algorithm"<sup>92</sup>, which uses non-resampled images in each participant's native space to align surfaces along tissue contours. Surfaces were smoothed using the "geodesic Gaussian surface smoothing algorithm"<sup>92</sup> and additional 2 mm FWHM smoothing that enhances subcortical regularization. Following denoising (see *fMRI denoising* for full details), surface-based functional timeseries were aligned with MSMAll<sup>93</sup>. MSMAll improves inter-participant alignment by using areal features from multiple sources in the reference pipeline developed by Glasser et al.<sup>93</sup>, including cortical folding, sulcal depth, T1w/T2w myelin maps, resting-state network maps, and visuotopic maps. The HCP minimal processing pipelines are optimized for surface-based processing of high-resolution anatomical and functional MRI images. Thus, we used the resulting grayordinate timeseries from each of the seven functional runs to perform the quality assurance and preliminary analyses reported herein. This included cortical, subcortical, and cerebellar vertices (i.e., 91,282 "whole-brain" gray ordinates) that were regionally mapped according to their corresponding atlas schemes (see *Parcellating timeseries into brain regions and functional connectivity*).

### ***fMRI denoising***

To remove sources of noise such as movement, scanner drift, and physiological artifacts, we implemented the data-driven MELODIC independent component analysis-FMRIB ICA-based Xnoiseifier (ICA-FIX; <sup>100,101</sup>). ICA-FIX is a denoising approach performed on each functional timeseries for each participant. Given that we closely followed the HCP's acquisition protocols and minimal processing pipelines, we applied FIX classifiers pre-trained on HCP data (using the HCP pipeline default, "HCP\_hp2000"). To provide flexibility for the varied research questions addressable with the TCP dataset, we separately performed both "single-run" and "multi-run" ICA-FIX. Single-run ICA-FIX, which was used for benchmarking and quality control herein (see [Figure S1](#) for example quality control scenes provided by the HCP pipelines), was performed on each functional run independently, and multi-run ICA-FIX was performed on: 1) concatenated the four resting-state runs, and 2) three task runs functional timeseries. Consistent with the HCP processing pipeline, we used a high-pass temporal filter of 2000s FWHM during single-run ICA-FIX. While spatial ICA likely provides components with better signal-to-noise separation via multi-run FIX (given longer timeseries data), single-run FIX is likely optimal for research questions (or benchmarking) requiring statistical independence across functional runs.

We performed global signal regression (GSR) to further control for noise sources in fMRI timeseries data<sup>102-105</sup>. GSR has been shown to remove global sources of noise<sup>106-108</sup> and improve behavioral prediction models<sup>109</sup>. However, it has also been shown that the global signal can carry behaviorally-relevant information<sup>109-111</sup>. Given this ongoing debate surrounding the use of GSR<sup>104,105</sup>, we provide denoised derivative timeseries with and without GSR and evaluate the impact of GSR on fMRI data in the *Technical Validation* sections below. We performed GSR for each participant and each functional run by regressing the mean timeseries across all vertices from each vertex<sup>112</sup>.

### ***Parcellating timeseries into brain regions and functional connectivity***

We parcellated the dense (i.e., 91,282 vertices) CIFTI timeseries into 434 brain regions that covered the cortex, subcortex, and cerebellum, by averaging the functional timeseries of the vertices belonging to a given region together. We used a previously validated surface-based functional atlas to parcellate the cortex into 400 regions<sup>113</sup>. This “homotopic” cortical atlas is a recent update to the widely-used Schaefer atlas<sup>114</sup> that improves upon hemispheric lateralization in brain systems known to be asymmetric, such as language processing regions. This atlas is openly available via website links in Schaefer et al.<sup>114</sup>. Subcortical vertices were parcellated into 16 bilateral brain regions (32 total) that are part of the medial temporal lobe, the thalamus, and the striatum (including the pallidum)<sup>115</sup>. These 32 regions were yielded by the “scale II” resolution provided by Tian and colleagues, which we implemented based on the finding that anatomical boundaries are well-captured at this resolution while also providing functional subdivisions. This atlas is openly available via website links in Tian et al.<sup>115</sup>. Lastly, we parcellated the cerebellum into one region per hemisphere (2 total) using the atlas provided by Buckner et al.<sup>116</sup>. Following the best practices provided by Buckner and colleagues, we regressed neighboring (6 mm) cortical signals from cerebellar vertices before parcellation to account for potential spatial autocorrelation between these brain segments.

Functional connectivity matrices were derived for each participant and each functional scan at three different stages of the pipeline: after minimal processing (see *Human Connectome Project minimal processing pipeline*), after ICA-FIX denoising, and after GSR was applied to denoised data (see *Functional MRI denoising*). The pairwise product-moment correlation between regional timeseries was computed, resulting in a 434 by 434 functional connectivity matrix for each participant and fMRI run.

### ***Functional connectivity quality control and benchmarking***

Estimates of brain function derived from fMRI, such as functional connectivity, are sensitive to artifacts from multiple sources, including in-scanner head movement, respiratory motion, and scanner effects<sup>117</sup>. To assess the success of denoising procedures, residual relationships between functional connectivity and in-scanner head motion can be examined and compared at different stages of the processing pipeline<sup>107,118,119</sup>. Head motion during each fMRI scan was estimated using framewise displacement (FD), a summary measure of head movement from one volume to the next<sup>107</sup>. For each scan, FD was calculated according to the method described by Jenkinson et al.<sup>120</sup> and the resulting FD trace was band-stop filtered and down-sampled to account for the high sampling rate of the multiband fMRI acquisition<sup>121</sup>. Distributions of mean FD for each participant and each fMRI run are provided in [Figure S2](#).

#### *FD-FC correlations.*

For each rs-fMRI run, we computed the cross-participant Spearman correlation between FD and functional connectivity at each pair of regions after denoising ([Fig. 3A-B](#)). Similar to previous work<sup>107,119</sup>, before denoising (i.e., after minimal processing), we find widespread positive associations between functional connectivity and FD with a moderate effect size across most connections in all four runs ([Fig. 3A](#), upper triangles), indicating a strong and wide-spread effect of in-scanner head motion on functional connectivity estimates. The mean correlation over the brain ranges across each run from  $\rho = .12 - .16$  ([Fig. 3B](#)). ICA-based denoising consistently reduced these positive associations ( $\rho = .04 - .08$ ; [Fig. 3B](#)) and adding GSR brings the mean correlation to  $\rho = .00 - .02$  ([Fig. 3A](#), lower triangles; [Fig. 3B](#)). However, in some cases (Rest 1 AP and Rest 1 PA), both ICA-based denoising and GSR induced negative associations between FD and functional connectivity. Overall, denoising procedures substantially reduced FD-FC associations across the brain. A broadly similar pattern of results was evident across the three task-based fMRI runs ([Fig. 4A-B](#)), with mean correlations across each run ranging from  $\rho = .07 -$

.14 before denoising, from  $\rho = .00 - .04$  after denoising and  $\rho = .00 - .02$  after GSR, albeit with GSR having a less pronounced effect on reducing FD-FC correlations.

When examining the proportion of connections significantly correlated with FD, we find that before denoising, across rs-fMRI runs, 35% to 56% of connections met the threshold for significance ( $p_{\text{FDR}} < .05$ ; [Fig. 3D](#)). After ICA-based denoising, there was a substantial drop in motion-affected connections, reflecting 1% to 19% of connections, depending on the fMRI run ([Fig. 3D](#)). In all runs except Rest 1 PA, GSR further reduces the number of motion-affected connections. A similar pattern of results was seen for the task-fMRI run, except that GSR consistently increased the number of motion-affected connections across all three runs compared to ICA-based denoising alone ([Fig. 4D](#)).

#### *FD-FC distance dependence.*

For each rs-fMRI run, we examined how the FD-FC relationship varies as a function of the pairwise Euclidean distance between the centroid of regions, as head motion generally has a more pronounced effect on the FD-FC correlation for short-range connectivity<sup>117,118,122</sup>. Specifically, the presence of head motion can artifactually increase correlations between regions that are closer and decrease correlations between areas that are further apart. This pattern of distance-dependence motion contamination was present across all rs-fMRI runs before denoising and was substantially reduced after ICA-based denoising ([Fig. 3C](#)). The addition of GSR did not have a notable impact. Similar results were found for task-fMRI runs ([Fig. 4C](#)).

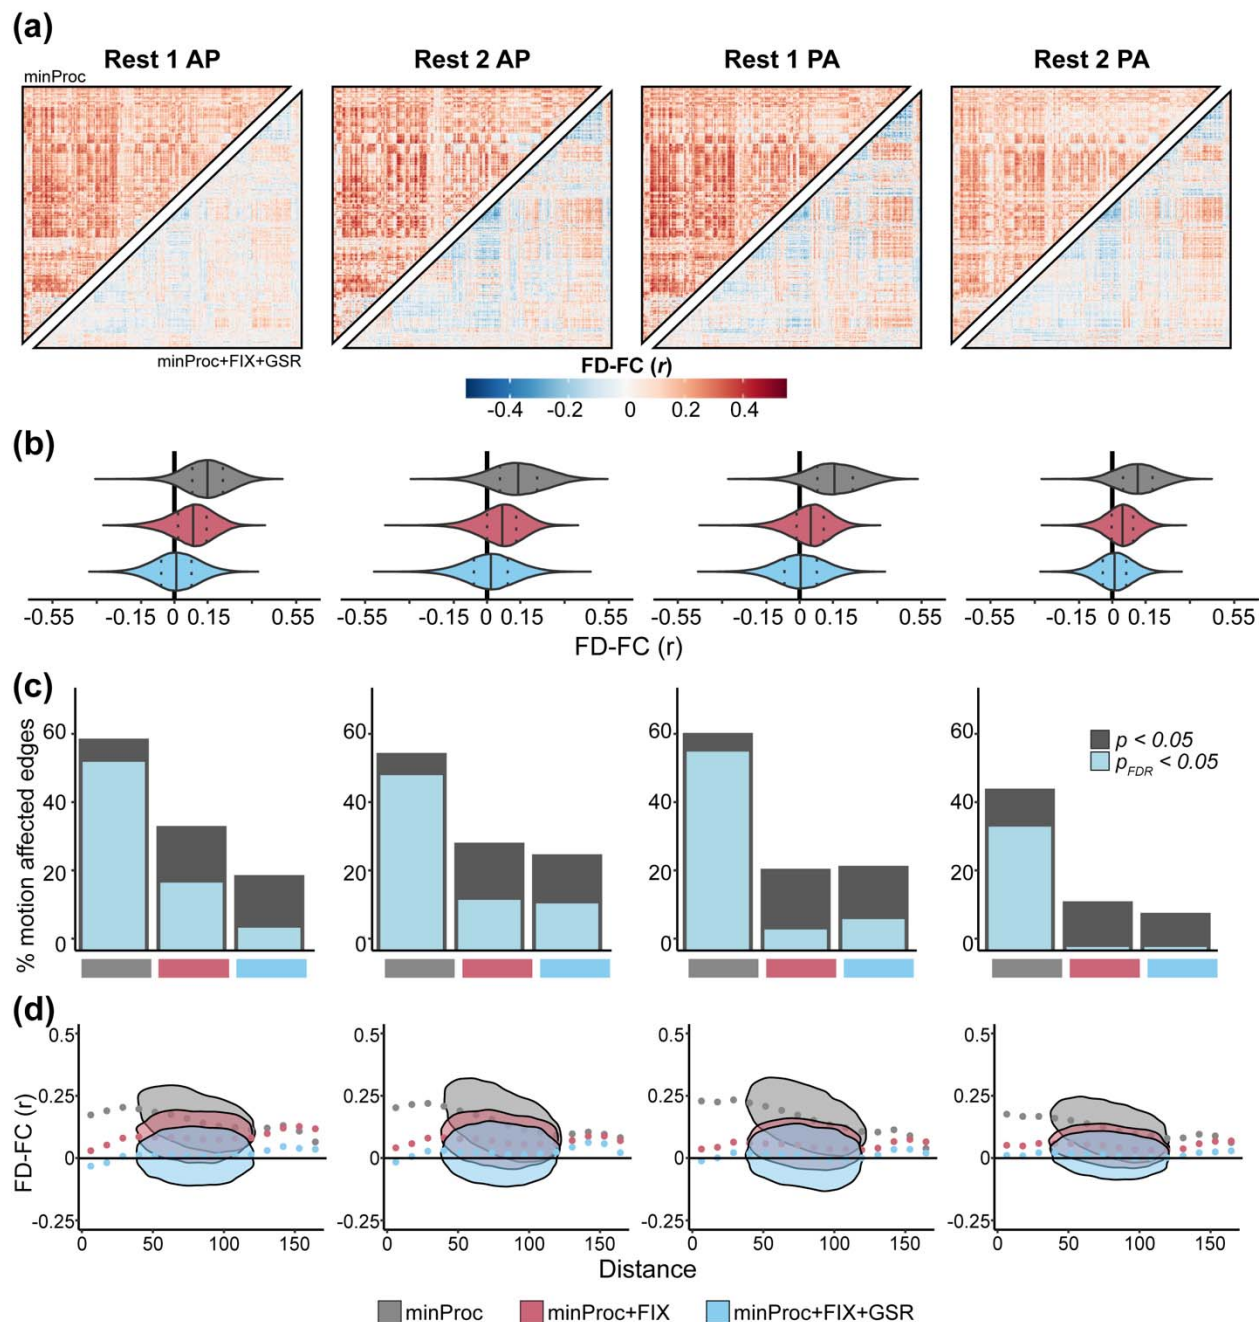

**Figure 3. Functional connectivity and head motion association across processing stages for resting-state fMRI runs.** (a) Inter-participant correlation between functional connectivity (FC) and mean framewise displacement (FD) at each of 93,961 connections for each resting-state fMRI run before denoising, i.e., after minimal processing (minProc; upper triangles) and after ICA-based denoising (FIX) and Global Signal Regression (GSR; lower triangles). (b) Distributions of FD-FC correlations for each run resting-state fMRI at three different processing stages: minProc, FIX, and GSR. (c) Percentage of connections significantly ( $p < 0.05$ , gray;  $p < 0.05_{FDR}$ , light blue) correlated with FD for each resting-state fMRI at each of the three processing stages. (d) Associations and density between FD-FC values and pairwise Euclidean distance between 432 regions for each resting-state fMRI run and processing stage.

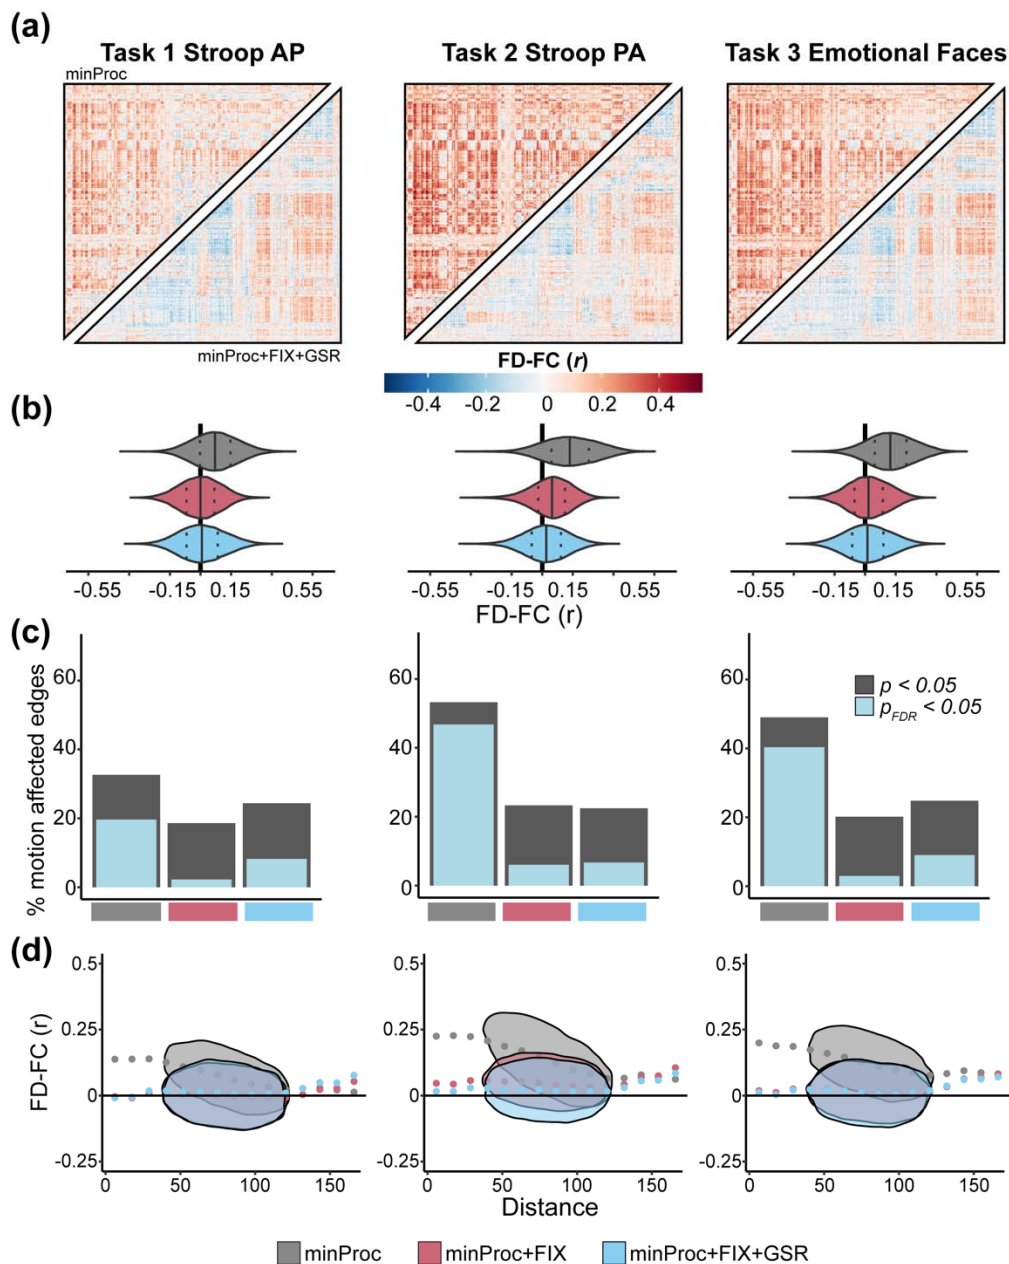

**Figure 4. Functional connectivity and head motion association across processing stages for task-based fMRI runs.** (a) Inter-participant correlation between functional connectivity (FC) and mean framewise displacement (FD) at each of 93,961 connections for each task-based fMRI run before denoising, i.e., after minimal processing (minProc; upper triangles) and after ICA-based denoising (FIX) and Global Signal Regression (GSR; lower triangles). (b) Distributions of FD-FC correlations for each run task-based fMRI at three different processing stages: minProc, FIX, and GSR. (c) The percentage of connections significantly ( $p < 0.05$ , gray;  $p < 0.05_{FDR}$ , light blue) correlated with FD for each task-based fMRI at the three processing stages. (d) Associations and density between FD-FC values and pairwise Euclidean distance between 432 regions for each task-based fMRI run and processing stage.

*Functional network structure.*

The regions in the cortical and subcortical atlases used are each provided with corresponding network assignments. We used the 17-network solution for cortical regions<sup>123</sup> and a 3-network anatomical solution for subcortical regions comprising the medial temporal lobe, striatum, and thalamus<sup>115</sup>. Lastly, we considered the two cerebellar regions as part of their own network, altogether resulting in 21 functional networks ([Fig. 5A-B](#)).

Functional connectivity estimated from rest and task fMRI typically exhibits a reliable and robust set of brain networks that encompass spatially discontinuous regions with temporally correlated activity. The topology and connectivity strengths of these networks are heritable<sup>124</sup> and linked with behavioral outcomes in both health<sup>125</sup> and illness<sup>126</sup>. To examine whether the expected functional network structure was present across each of the fMRI runs, functional connectivity matrices were Fisher z-transformed, averaged across participants, and then the group-average matrix was transformed back into product-moment correlations ([Fig. 5C](#), visualizing FC estimated from data with denoising and GSR). The columns and rows of each group average connectivity matrix were reordered according to the previously established 21-network scheme ([Fig. 5A-B](#)), revealing the expected pattern of pronounced within-network connectivity ([Fig. 5C](#), diagonal blocks), compared to reduced between-network connectivity ([Fig. 5C](#), off-diagonal blocks). We report group average functional connectivity matrices with and without ICA-based denoising and with and without GSR in [Figure S3](#).

Across the network neuroscience literature, there is strong evidence that functional network organization is highly similar across neurocognitive states, particularly across rest- and task-state connectivity estimates<sup>127-130</sup>. Rest-to-task changes in network connectivity patterns are typically limited in magnitude, small in extent (i.e., only a subset of regional pairs change), and tend to be decreases in connectivity<sup>131</sup>. It is worth noting, however, that prior work suggests these relatively subtle task-evoked changes likely carry important information for behavioral



and/or cognitive functioning<sup>130,132</sup>. In the present work, we report the similarity of connectivity patterns for each pair of functional runs (Fig. 5D), estimated with the nonparametric Mantel test<sup>133</sup>. As expected, stronger similarity patterns were generally observed across similar states, i.e., resting states (runs 1 AP/PA and 2 AP/PA), Stroop (AP/PA), and emotional faces task states.

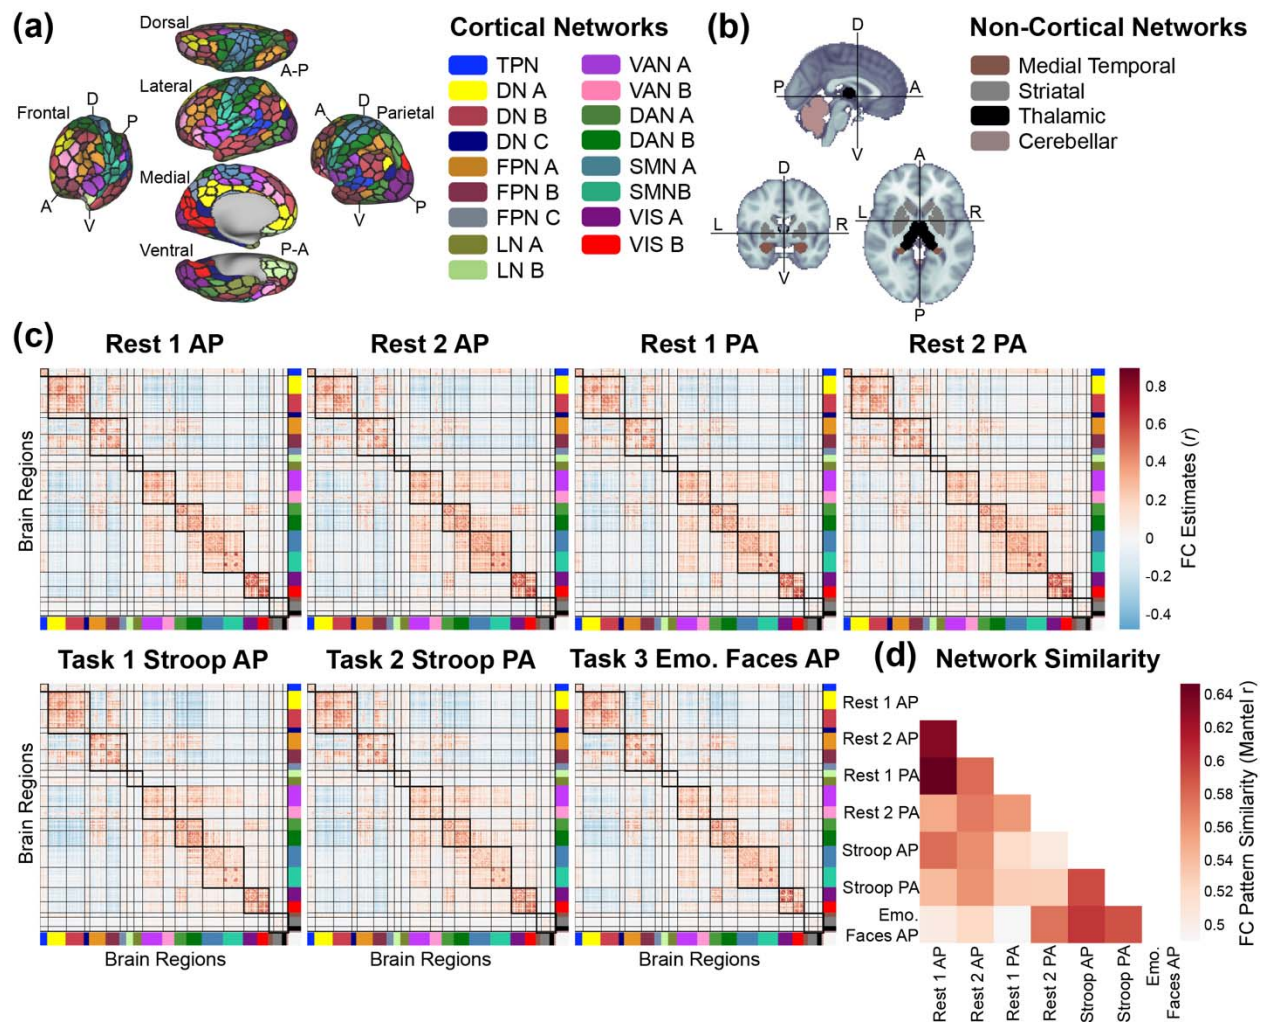

**Figure 5. Average functional network structure and similarity across each fMRI run. (a)** Whole-brain regional parcellation (black borders, 432 regions<sup>113,115,116</sup>) and network partition (filled in colors, 21 networks) across the cortex (a) and non-cortex (b) (see *Parcellating timeseries into brain regions and functional connectivity for full details*). TPN: temporal parietal network, DN: default network, FPN: frontoparietal network (sometimes referred to as cognitive control network), LN: limbic network, VAN: salience/ventral attention network, DAN: dorsal attention network, SMN: somatomotor network, VIS: visual network. The medial temporal network contains hippocampal and amygdalar regions; the striatal network contains caudate, nucleus accumbens, putamen, and globus pallidus regions. The thalamic and cerebellar networks contain only thalamus and cerebellum, respectively. **(c)** Functional connectivity (FC) estimates for 6 neurocognitive states (across-participant averages). Thick and thin black borders

delineate within- and between-network borders, respectively. **(d)** Similarity of functional connectivity patterns for each pair of neurocognitive states using the nonparametric Mantel test.

### ***Benchmarking functional network properties with graph-theoretic metrics***

A common approach in network neuroscience is to leverage graph theoretic tools to characterize the properties underlying brain connectivity patterns via neurobiologically relevant and computationally tractable metrics<sup>91,134-140</sup>, sometimes referred to as network diagnostics<sup>141</sup>. Given that the neuroimaging acquisition and processing protocols of the TCP dataset were optimized for functional network analysis, we aimed to demonstrate that well-established network properties are discoverable in TCP connectomes. To this end, we implemented the following network analyses: 1) clustering coefficient, 2) degree strength, and 3) betweenness centrality (Fig. 6). We used the Brain Connectivity Toolbox<sup>91</sup> (<http://www.brain-connectivity-toolbox.net>) adapted to Python (i.e., bctpy), which is openly available here: <https://pypi.org/project/bctpy/>. Each metric was applied to both pairwise regional functional connectivity estimates (i.e., “region level”) and subsequently averaged based on network assignment (i.e., “network level”). Given that we used product-moment correlation to estimate functional connectivity (see *Parcellating timeseries into brain regions and functional connectivity* and *Functional connectivity quality control and benchmarking*), we used the “weighted and undirected” variant<sup>91,142</sup> of these metrics. We used min-max normalization to average network metric scores across participants and scaled all results between 0 and 1. Min-max normalization was used to maintain the relative distribution of scores across participants while scaling possible values to a fixed, comparable range. However, we encourage future investigations to consider normalization techniques that account for potential extremes if appropriate for the research question and network metric.

The clustering coefficient is a metric for quantifying the extent that local connectivity patterns are segregated and is based on the average “intensity” or “abundance” of triangles that are present

around a given region<sup>142-144</sup>. Triangles refer to connectivity estimates adjacent to the given region, and their intensity is given by the relative extent (i.e., fraction) that those regions are also connected. Clustering can be thought of as the relative magnitude that a neighborhood of connections is “established” or “complete”. Therefore, a relatively large region-level score indicates clustered connectivity surrounding that region, and a large network-level score indicates that regions in that functional system tend to cluster together. A common inference for such clustering is that it supports local efficiency of information processing and community structure<sup>145</sup>. Across participants, we observed non-random clustering patterns across brain regions and functional networks ([Fig. 6A](#)), which is broadly consistent with prior work demonstrating that functional brain networks exhibit clustering and expected properties such as small worldness<sup>145</sup>. In resting-state connectivity matrices, high clustering was observed in all dorsal attention, somatomotor, temporoparietal, cerebellar, and visual network regions, as well as ventral attention A, frontoparietal B, and default A and B network regions. This resting-state pattern was slightly modified during Stroop and Emotional Faces task states. Stroop connectivity patterns exhibited reduced clustering within somatomotor, visual, cerebellar, and temporoparietal network regions. Emotional Faces connectivity patterns exhibited an overall similar pattern to resting-state, just reduced in magnitude.

The degree strength of a given brain region is a straightforward and commonly applied network metric that quantifies the relative magnitude of connectivity estimates for a given region<sup>91</sup>. This is similar to the degree – the number of connections for a given region – but more appropriate for fully connected networks. Regions with relatively large degree strength are thought to be more important in a given network, and the network-level degree strength is often interpreted as the wiring cost or density of that brain system<sup>91,146</sup>. This is an important consideration for research questions that are sensitive to heterogeneous metabolic demands across different brain systems, different participant groups, or both, given the association between the efficiency

of energy consumption and degree of connectivity patterns<sup>147</sup>. Here ([Fig. 6B](#)), resting-state functional connectivity patterns exhibited relatively higher degree strength in temporoparietal and somatomotor network regions, as well as ventral attention A, dorsal attention B, and default C network regions. This pattern was consistent but with reduced overall magnitude in all task states, suggesting that the network-level degree strength is a relatively stable metric across neurocognitive states. An interesting exception was the relative reduction of degree strength exhibited by default A and B network regions in Stroop task states, which is broadly consistent with the traditional view of the default network being less prominent during task engagement<sup>148</sup> (although see Spreng<sup>149</sup>).

Betweenness centrality is a metric that estimates the extent to which a given region interacts with other regions<sup>150,151</sup>. Such central areas are sometimes called “hubs” and are integral for integrated information flow across brain systems<sup>91,152,153</sup>. Multiple network metrics quantify different hub properties; however, betweenness centrality quantifies the fraction of shortest connectivity paths that contain the given region<sup>91</sup>. Therefore, a high betweenness centrality score indicates that the region participates in a relatively large number of short paths in the brain network and can be conceptualized as bridges in the system. Across all resting-state connectomes, regions in the frontoparietal, dorsal attention, visual, and cerebellar networks exhibited high betweenness centrality, as well as regions in the default A/B, and ventral attention B networks ([Fig. 6C](#)). This pattern was similar across Stroop task-state connectivity patterns, but with a relatively more pronounced centrality in frontoparietal B network regions, and relatively reduced centrality in visual and cerebellar network regions, which is broadly consistent with the theory that frontoparietal network interactions support cognitive control processes<sup>154,155</sup>. During the Emotional Faces task, connectivity patterns exhibited relatively more centrality in visual A and dorsal attention A network regions, which is expected given that this task requires participants to make judgements about the context of visual stimuli.

**(a) Clustering coefficient**

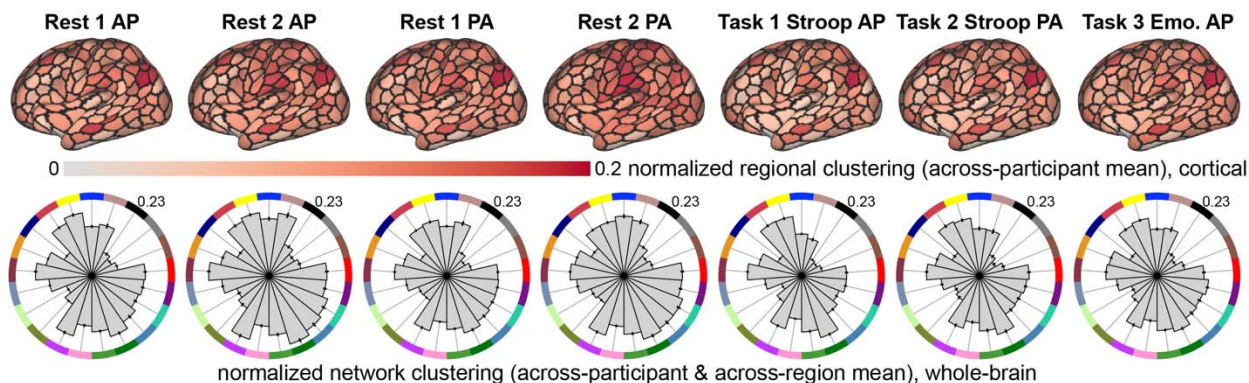

**(b) Degree strength**

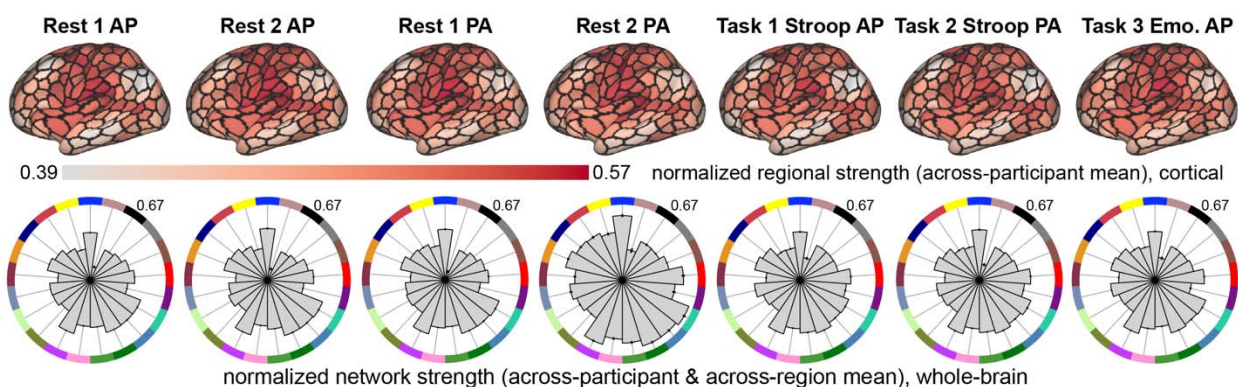

**(c) Betweenness centrality**

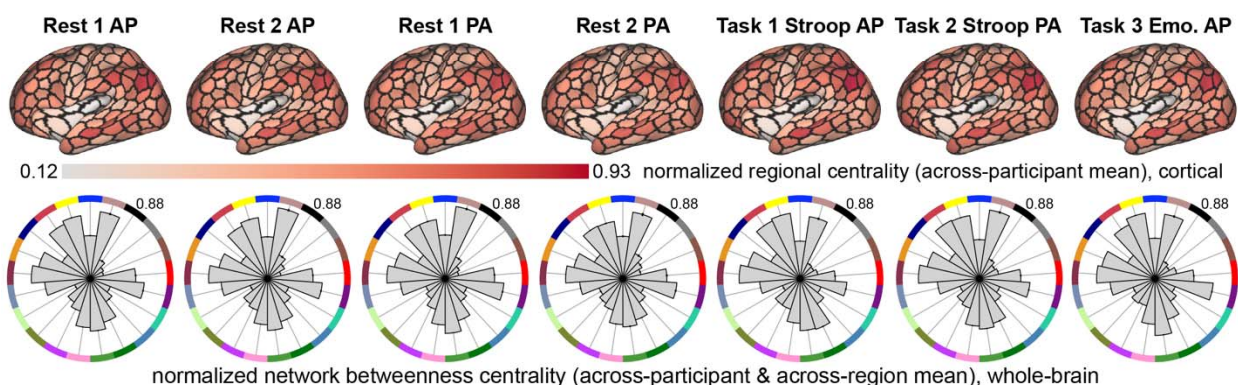

**(d) Functional network legend**

**Cortical Networks**

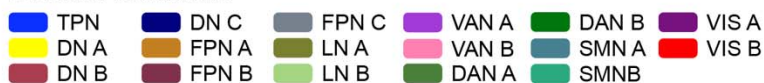

**Non-Cortical Networks**

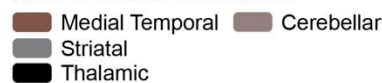

**Figure 6. Network properties for each fMRI run.** (a) The across-participant average (i.e., group-level) clustering coefficient scores at the region level (*top*: projected onto surface-based cortical brain schematics with black outlines delineating cortical regions given by Yan et al.<sup>113</sup>; showing the lateral view

of the right hemisphere only for ease of visualization) and at the network-level (*bottom*: polar plots organized by network assignment, which follows label colors in panel d, and the maximum value is listed on the top right of each plot). Before averaging, scores were normalized across the entire dataset using min-max feature scaling (between the values of 0 and 1). **(b)** The same as panel a, but for the metric of degree strength. **(c)** The same as panels a and b, but for the betweenness centrality metric. **(d)** Legend of colors used to indicate functional network assignment in polar plots, corresponding to Fig. 5.

### ***Inter-scale correlations and latent structure across measures of behavior***

To assess associations between 110 scales and subscale scores across participants (see [Table S1](#) for distributions and descriptive metrics), after z-scoring each scale, we computed product-moment correlations between each pair of measures using pairwise complete observations. This was done separately for individuals with ([Fig. 7A](#), lower triangle) and without a diagnosis ([Fig. 7A](#), upper triangle), with both groups showing a highly similar inter-scale correlation structure ( $r = .74$ ).

When examining select individual scales for consistency with previous findings ([Fig. 7B](#)), individuals with a mental health diagnosis, on average, had higher scores on measures of abuse on the Childhood Trauma Questionnaire<sup>71</sup> and neuroticism on the NEO Five-Factor Inventory<sup>75</sup>. These individuals also showed higher scores on measures of catastrophizing, blame, and rumination, as indexed by the Cognitive Emotional Regulation questionnaire<sup>58</sup>, and worse performance across a range of computerized measures of cognitive performance<sup>8</sup> from the Test My Brain battery.

In recent years, there has been a growing interest in exploring novel data-driven approaches to understanding psychopathological nosology by examining covariation among symptoms and maladaptive behaviors<sup>156</sup>. To examine latent dimensions of behavior that may be captured by the range of scales and subscale scores, we used Principal Component Analysis (PCA). Standard PCA cannot account for missing data and is biased by highly non-gaussian distributions, such as zero-inflated distributions often seen in clinical measures. Therefore, we

imputed missing data using a simulation-based multi-algorithm comparison framework (*missCompare*<sup>157</sup>).

Following best practice, prior to imputation, the number of participants and measures was reduced to minimize missingness<sup>157</sup>. An optimal threshold for removing participants and scales was found by visualizing the proportion of missing data as a function of removing an increasing number of participants and measures and finding inflection points. This led to removing participants with >20% and variables with >25% missing data. This resulted in 191 participants and 104 measures being entered into the imputation process. Following the *missCompare* framework, 50 simulated datasets matching multivariate characteristics of the original data were generated, and then missingness patterns from the original data were added to the simulated data. Then, the missing data in each simulated dataset were imputed using a curated list of 16 algorithms<sup>157</sup>, and finally, the computation time and imputation accuracy of each algorithm were assessed by calculating Root Mean Square Error (RMSE), Mean Absolute Error (MAE) and Kolmogorov-Smirnov (KS) values between the imputed and the simulated data points (see [Figure S4](#)). These metrics were compared under three conditions: Missing Completely At Random (MCAR), Missing At Random (MAR), and Missing Not At Random or Non-Ignorable (MNAR). The *missForest* algorithm<sup>158</sup>, an iterative imputation method based on a random forest, consistently performed the best compared to all other algorithms across all metrics evaluated and was therefore used to impute the missing values in the observed data. Finally, post-imputation diagnostics, including visual examination of data distributions and stability of correlation coefficients between measures, before and after imputation, were examined, with both checks showing minimal impact of imputation. Non-gaussian measures were transformed using an optimal normalizing transformations framework (*bestNormalize*<sup>159</sup>), where normalization efficacy is evaluated and compared across a suite of possible transformations and

evaluated for normality on goodness of fit statistics. Highly non-gaussian measures, such as those with zero inflation, were binarized.

The PCA analysis of the imputed and transformed behavioral data revealed that the first component, which accounted for 21% of the variance, represented a general functioning and well-being factor ([Fig. 7C-D](#)). This component exhibited high absolute loadings on a broad array of measures, and higher scores were associated with lower anxiety and depressive symptoms, neuroticism, impulsivity, stress, forgetfulness, fatigue, avoidance, and higher conscientiousness and self-directedness ([Fig. 7D](#)). The second, third, and fourth components were linked to internalizing, externalizing, and cognitive functioning, explaining 9%, 8%, and 6% of the variance, respectively ([Fig. 7C](#)). Higher scores on the second component were associated with lower childhood emotional and physical trauma, depressive traits and symptoms, general clinical functioning, perceived social support, neuroticism, suicidal ideation, stress, and tension ([Fig. 7D](#)). Elevated scores on the third component were related to higher extraversion, fun, novelty and pleasure-seeking, impulsiveness, social and recreational risk-taking, openness to experience and reward dependence, and lower harm avoidance, and autism traits, including rigidity and aloofness ([Fig. 7D](#)). Higher scores on the fourth component were associated with slower reaction times on multiple cognitive tasks, slower processing speed, worse abstract reasoning, memory and vocabulary, and higher concerns related to health, ethics, and recreation.



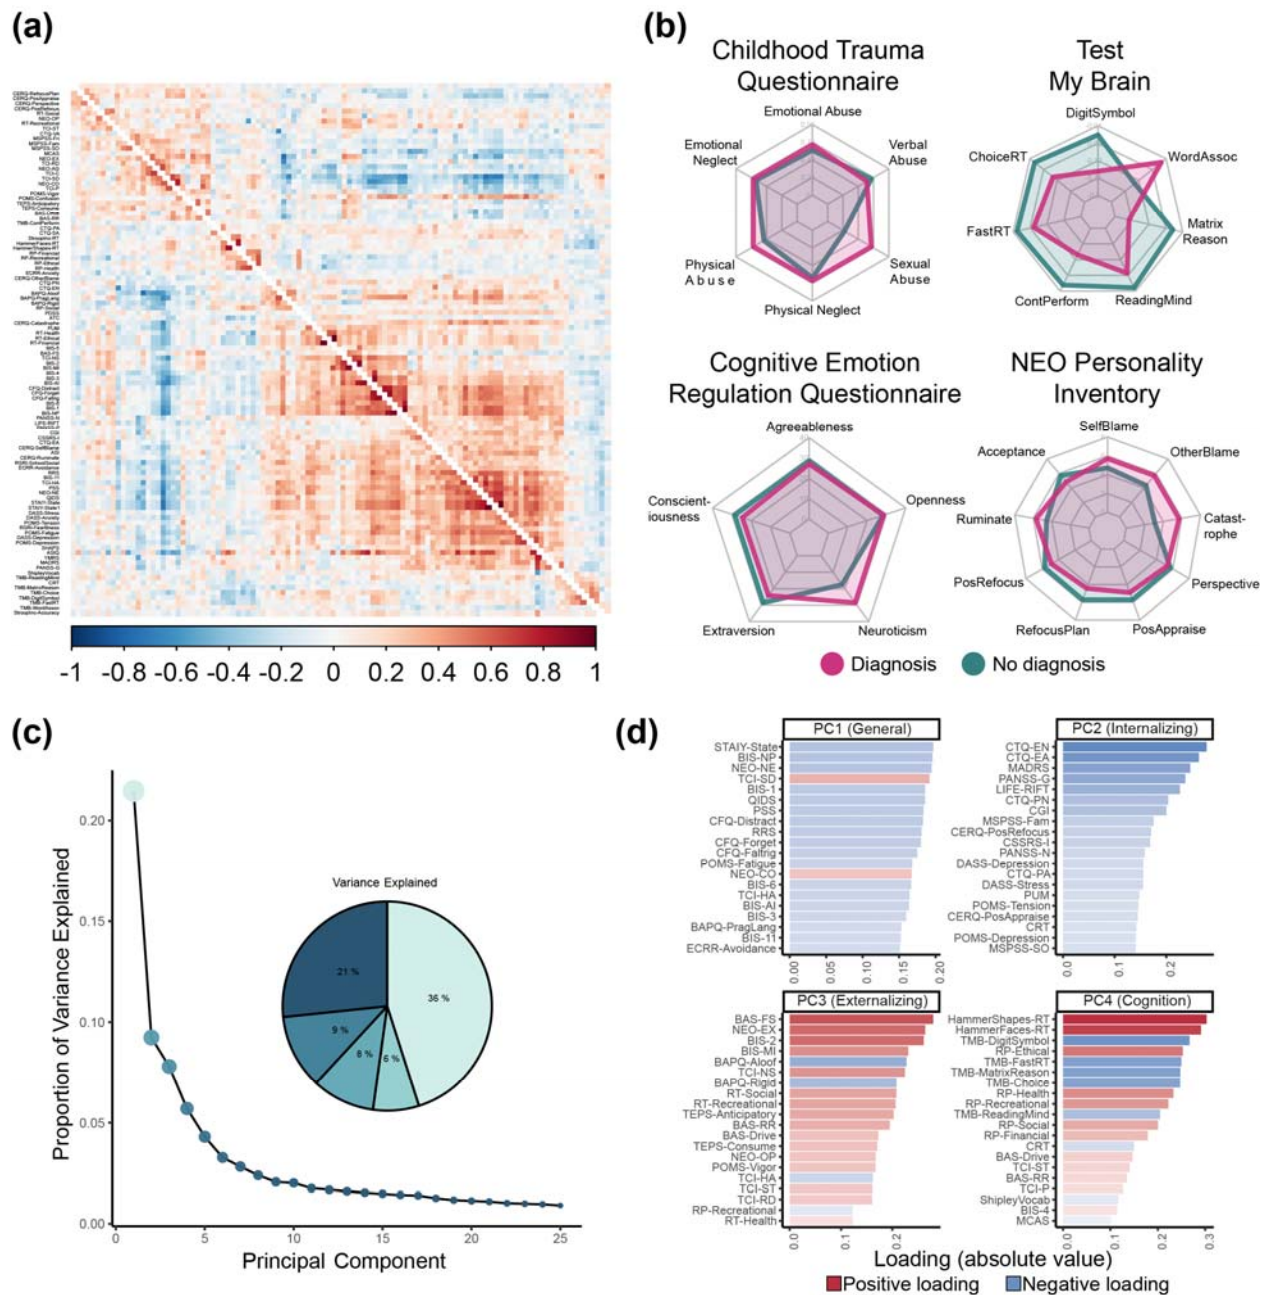

**Figure 7. Behavioral data associations and latent structure. (a)** Inter-participant correlation matrix between 110 scales and subscales for individuals with (top-triangle) and without (bottom-triangle) a diagnosis, with the rows and columns ordered using hierarchical clustering. **(b)** Radar plots showing scale score differences between individuals with (pink) and without (green) a diagnosis across select measures **(c)** Screeplot and pie chart of the variance explained by the first 25 components from a PCA conducted on imputed and transformed behavioral data across all participants. **(d)** Top 30 absolute positive (red) and negative (blue) loadings on the first four principal components.

**Task-based fMRI activation and behavioral outcomes**

Here, we report the performance data and brain activity estimates for the Stroop and Emotional Faces task fMRI paradigms to validate them against known effects in the literature. The Stroop task is a well-replicated assessment of inhibitory cognitive control<sup>12</sup>. In the Stroop task, participants must identify colors of printed words that are congruent or incongruent with the given text (see *Task fMRI paradigms* for further details). Thus, congruent trials are lower conflict and easier to identify, and incongruent trials are higher conflict and more difficult to identify. As expected, participants performed significantly better on congruent than incongruent trials both in terms of accuracy ( $t(225) = 7.59, p = 4.3 \times 10^{-13}$ ) and reaction time ( $t(225) = -29.32, p = 4.3 \times 10^{-79}$ ) (Fig. 8A-B). While these “Stroop effects” were statistically significant in both the diagnosis and no diagnosis groups, participants with psychiatric diagnoses exhibited less differentiated accuracy between congruent and incongruent trials (diagnoses:  $t(134) = 4.94, p = 1.2 \times 10^{-6}$ ; no diagnoses:  $t(90) = 6.14, p = 1.1 \times 10^{-8}$ ), but more differentiated reaction times between congruent and incongruent trials (diagnoses:  $t(134) = -23.5, p = 1.1 \times 10^{-49}$ ; no diagnoses:  $t(90) = -17.79, p = 1.6 \times 10^{-31}$ ). This suggests that participants with diagnoses required more time than those without diagnoses to exert inhibitory cognitive control during incongruent trials (with reference to performance on congruent trials).

Next, we performed task GLMs on the functional neuroimaging data acquired during these task states (Fig. 8C). For the Stroop GLM, we used the congruent and incongruent conditions as regressors, and for the Emotional Faces GLM, we used face and shape conditions as regressors. For each participant, task events were time-locked to the onset of each trial and convolved with a canonical hemodynamic response function (HRF<sup>160</sup>), as well as a parameter for the first temporal derivative of the HRF. In addition, 8 parameters accounting for potential low-frequency signals (i.e., drift; with a cutoff of 0.01 Hz) that used a discrete cosine transform were added, as well as a constant parameter. We examined correct trials only and specifically contrasted the aforementioned conditions of interest (e.g., incongruent > congruent) for each

vertex across the whole brain. The resulting individual-level statistical maps were compared using one-sample t-testing (versus 0) across participants to obtain group-level statistical maps (shown in [Fig. 8](#)). We used false discovery rate (FDR) correction for multiple comparisons<sup>161</sup> with a family-wise error rate of  $\alpha=0.05$ . Vertices that passed FDR correction are outlined in black borders in [Fig. 8](#).

As shown in prior work, brain regions in the cingulate gyrus and lateral prefrontal cortex were significantly more responsive to incongruent versus congruent trials during the Stroop task<sup>162,163</sup>. Additionally, regions distributed across functional systems were more responsive to incongruent trials, including the frontoparietal, dorsal/ventral attention, somatomotor, and visual networks. In the Emotional Faces task, subcortical vertices in the amygdala exhibited a robust and selective responsiveness to emotional faces versus shapes. This is consistent with the literature which reports that the Emotional Faces task reliably activates the amygdala in response to affective images of human faces<sup>10,164</sup>. These results validate that the Stroop and Emotional Faces task fMRI paradigms activate brain regions and systems previously shown to be involved with cognitive control and emotional reactivity, respectively. We performed these analyses across all participants, but we encourage future research with the TCP dataset to examine the extent to which brain activity and network interactions may be differentiable with diagnostic status.

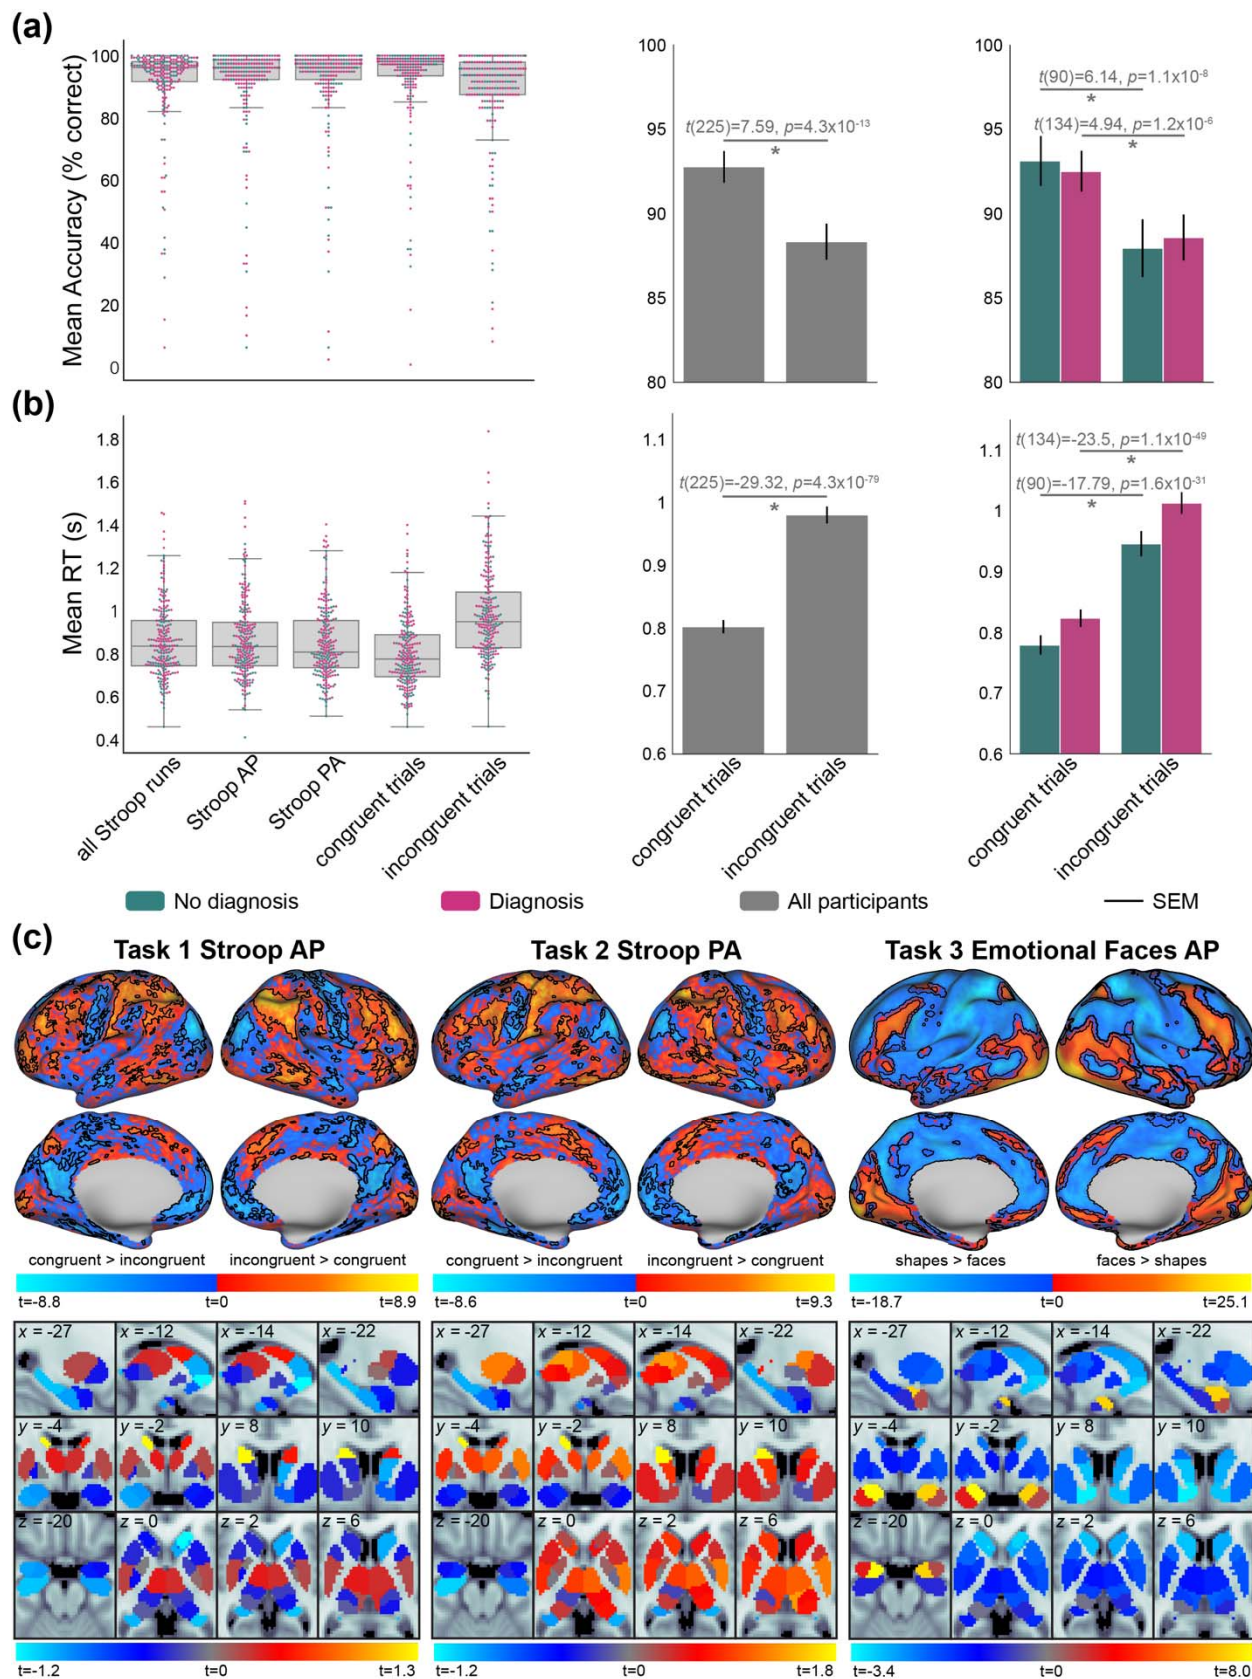

**Figure 8. Functional task-activation and behavioral data from Stroop and Emotional Faces tasks.** **(a)** Stroop task performance quantified via percentage of correct responses. *Left:* across-participant distribution of accuracy scores for all trials and runs, trials in each AP and PA functional run, and trials in each of the congruent and incongruent conditions. Lines inside boxplots indicate median performance, and dots indicate individual participant scores. For each figure, participants with diagnoses are coded with pink, and without diagnoses coded with turquoise, as applicable. *Middle:* Paired t-test of congruent versus incongruent accuracies across all participants. *Right:* The same as the middle panel, but for the diagnosis and no diagnosis groups. SEM: standard error of the mean. **(b)** Same as panel a, but for the performance metric of reaction time (seconds). **(c)** GLM-based planned contrasts for functional neuroimaging data for the Stroop (*left:* AP; *middle:* PA) and Emotional Faces (*right:*) tasks. Cool and warm color scales show complementary contrasts, overlaid together on one brain schematic. For example, for the two Stroop runs, brain activity that was greater for congruent versus incongruent trials in cool color scale, and incongruent greater than congruent trials in warm color scale. Results for cortical vertices are projected onto a surface-based brain schematic (black borders surround vertices whose contrasts passed FDR correction). Subcortical results are projected onto a standard MNI (2 mm) volume-based brain schematic, showing average contrast statistics for each of the 32 regions provided by Tian et al.<sup>115</sup>. Three slices are shown following the visualizations in Tian et al.<sup>115</sup>, plus an additional slice to highlight the amygdala ( $x=-27$ ,  $y=-4$ ,  $z=-20$ ). The group-level statistical activation maps are shown in all projections.

## Usage Notes

Transdiagnostic neuroimaging datasets with a broad range of behavioral measures are necessary to address complex questions regarding the relation between brain and behavior in psychiatry. The TCP release provided a curated collection of neuroimaging, behavioral, cognitive, and personality data from 241 individuals meeting diagnostic criteria for a broad range of disorders, as well as individuals who do not meet these diagnostic thresholds (i.e., healthy controls). The data collection provides both processed and analysis-ready neuroimaging data using HCP-validated processing pipelines, as well as raw and anonymized BIDS-formatted data to allow researchers to implement alternate processing. Raw neuroimaging data and all behavioral measures can be accessed via OpenNeuro (<https://openneuro.org/datasets/ds005237>). Raw and processed neuroimaging data, as well as all behavioral measures, can be openly accessed via the NDA ([https://nda.nih.gov/edit\\_collection.html?id=3552](https://nda.nih.gov/edit_collection.html?id=3552)) upon publication.

## Code Availability

The HCP processing pipelines are openly available here: <https://github.com/Washington-University/HCPpipelines>. All network metric code is available here:

<https://github.com/aestrivex/bctpy> (Python) and here: <https://sites.google.com/site/bctnet/> (MATLAB). All other code used for post-processing, FC estimation, and quality assurance analyses are available here: <https://github.com/HolmesLab/TransdiagnosticConnectomeProject>.

## References

- 1 Holmes, A. J. & Patrick, L. M. The Myth of Optimality in Clinical Neuroscience. *Trends in Cognitive Sciences* **22**, doi:10.1016/j.tics.2017.12.006 (2018).
- 2 Hyman, S. E. The Diagnosis of Mental Disorders: The Problem of Reification. *Annual review of clinical psychology* **6**, doi:10.1146/annurev.clinpsy.3.022806.091532 (2010).
- 3 Romero, C. *et al.* Exploring the genetic overlap between twelve psychiatric disorders. *Nature Genetics* **54**, doi:10.1038/s41588-022-01245-2 (2022).
- 4 Bycroft, C. *et al.* The UK Biobank resource with deep phenotyping and genomic data. *Nature* **562**, doi:10.1038/s41586-018-0579-z (2018).
- 5 Poldrack, R. A. *et al.* A phenome-wide examination of neural and cognitive function. *Scientific Data* **3**, doi:10.1038/sdata.2016.110 (2016).
- 6 Van Essen, D. C. *et al.* The WU-Minn Human Connectome Project: An Overview. *NeuroImage* **80**, doi:10.1016/j.neuroimage.2013.05.041 (2013).
- 7 Health, N. I. o. M. *Mental Illness*, <<https://www.nimh.nih.gov/health/statistics/mental-illness>> (2023).
- 8 Passell, E. *et al.* Digital Cognitive Assessment: Results from the TestMyBrain NIMH Research Domain Criteria (RDoC) Field Test Battery Report. *PsyArXiv*, doi:10.31234/osf.io/dcszr (2019).
- 9 Van Essen, D. C. *et al.* The Human Connectome Project: A data acquisition perspective. *NeuroImage* **4**, doi:10.1016/j.neuroimage.2012.02.018 (2012).
- 10 Hariri, A. R., Tessitore, A., Mattay, V. S., Fera, F. & Weinberger, D. R. The Amygdala Response to Emotional Stimuli: A Comparison of Faces and Scenes. *NeuroImage* **1**, doi:10.1006/nimg.2002.1179 (2002).
- 11 Peirce, J. W. PsychoPy—Psychophysics software in Python. *Journal of Neuroscience Methods* **162**, doi:10.1016/j.jneumeth.2006.11.017 (2007).
- 12 Stroop, J. R. Studies of interference in serial verbal reactions. *Journal of Experimental Psychology* **18**, 643-662, doi:<https://doi.org/10.1037/h0054651> (1935).
- 13 Comalli, P. E., Wapner, S. & Werner, H. Interference effects of Stroop Color-Word Test in childhood, adulthood, and aging. *The Journal of Genetic Psychology* **100**, 47-53 (1962).
- 14 Klein, G. S. Semantic Power Measured through the Interference of Words with Color-Naming. *The American Journal of Psychology* **77**, doi:10.2307/1420768 (1964).
- 15 Jensen, A. R. & Rohwer Jr., W. D. The stroop color-word test: A review. *Acta Psychologica* **25**, doi:10.1016/0001-6918(66)90004-7 (1966).
- 16 MacLeod, C. M. Half a century of research on the Stroop effect: An integrative review. *Psychological Bulletin* **109**, 163-203, doi:<https://doi.org/10.1037/0033-2909.109.2.163> (1991).
- 17 Scarpina, F. & Tagini, S. The Stroop Color and Word Test. *Frontiers in Psychology* **8**, doi:10.3389/fpsyg.2017.00557 (2017).

- 18 Cohen, J. D., Dunbar, K. & McClelland, J. L. On the control of automatic processes: A parallel distributed processing account of the Stroop effect. *Psychological Review* **97**, 332-361, doi:<https://doi.org/10.1037/0033-295X.97.3.332> (1990).
- 19 Wright, B. C. What Stroop tasks can tell us about selective attention from childhood to adulthood. *British Journal of Psychology* **108**, doi:10.1111/bjop.12230 (2017).
- 20 Algom, D. C., Eran. Reclaiming the Stroop Effect Back From Control to Input-Driven Attention and Perception. *Frontiers in Psychology* **10**, doi:10.3389/fpsyg.2019.01683 (2019).
- 21 Periañez, J. A., Lubrini, G., García-Gutiérrez, A. & Ríos-Lago, M. Construct Validity of the Stroop Color-Word Test: Influence of Speed of Visual Search, Verbal Fluency, Working Memory, Cognitive Flexibility, and Conflict Monitoring. *Archives of Clinical Neuropsychology* **36**, doi:10.1093/arclin/acia034 (2021).
- 22 Hepp, H. H., Maier, S., Hermle, L. & Spitzer, M. The Stroop effect in schizophrenic patients. *Schizophrenia Research* **22**, doi:10.1016/S0920-9964(96)00080-1 (1996).
- 23 Henik, A. & Salo, R. Schizophrenia and the Stroop Effect. *Behavioral and Cognitive Neuroscience Reviews* **3**, doi:10.1177/1534582304263252 (2004).
- 24 Barch, D. M., Braver, T. S., Carter, C. S., Poldrack, R. A. & Robbins, T. W. CNTRICS Final Task Selection: Executive Control. *Schizophrenia Bulletin* **35**, doi:10.1093/schbul/sbn154 (2009).
- 25 Lubrini, G. *et al.* Clinical Spanish Norms of the Stroop Test for Traumatic Brain Injury and Schizophrenia. *The Spanish Journal of Psychology* **17**, doi:10.1017/sjp.2014.90 (2014).
- 26 Young, S., Bramham, J., Tyson, C. & Morris, R. Inhibitory dysfunction on the Stroop in adults diagnosed with attention deficit hyperactivity disorder. *Personality and Individual Differences* **41**, doi:10.1016/j.paid.2006.01.010 (2006).
- 27 Lansbergen, M. M., Kenemans, J. L. & van Engeland, H. Stroop interference and attention-deficit/hyperactivity disorder: A review and meta-analysis. *Neuropsychology* **21**, doi:10.1037/0894-4105.21.2.251 (2007).
- 28 Vakil, E., Mass, M. & Schiff, R. Eye Movement Performance on the Stroop Test in Adults With ADHD. *Journal of Attention Disorders* **23**, doi:10.1177/1087054716642904 (2016).
- 29 Arán Filippetti, V. R., María Cristina; Krumm, Gabriela; Raimondi, Waldina. Cognitive and socioeconomic predictors of Stroop performance in children and developmental patterns according to socioeconomic status and ADHD subtype. *Psychology & Neuroscience* **14**, 183-206, doi:<https://doi.org/10.1037/pne0000224> (2021).
- 30 Wagner, G. *et al.* Cortical Inefficiency in Patients with Unipolar Depression: An Event-Related fMRI Study with the Stroop Task. *Biological Psychiatry* **59**, doi:10.1016/j.biopsych.2005.10.025 (2006).
- 31 Mitterschiffthaler, M. T. *et al.* Neural basis of the emotional Stroop interference effect in major depression. *Psychological Medicine* **38**, doi:10.1017/S0033291707001523 (2008).
- 32 Epp, A. M., Dobson, K. S., Dozois, D. J. A. & Frewen, P. A. A systematic meta-analysis of the Stroop task in depression. *Clinical Psychology Review* **4**, doi:10.1016/j.cpr.2012.02.005 (2012).
- 33 Carpenter, K. M., Schreiber, E., Church, S. & McDowell, D. Drug Stroop performance: relationships with primary substance of use and treatment outcome in a drug-dependent outpatient sample. *Addictive Behaviors* **31**, doi:10.1016/j.addbeh.2005.04.012 (2006).
- 34 Smith, D. G. & Ersche, K. D. Using a drug-word Stroop task to differentiate recreational from dependent drug use. *CNS Spectrums* **19**, doi:10.1017/S1092852914000133 (2014).
- 35 DeVito, E. E., Kiluk, B. D., Nich, C., Mouratidis, M. & Carroll, K. M. Drug Stroop: mechanisms of response to computerized cognitive behavioral therapy for cocaine dependence in a randomized clinical trial. *Drug and alcohol dependence* **183**, doi:10.1016/j.drugalcdep.2017.10.022 (2017).

- 36 McTeague, L. M., Goodkind, M. S. & Etkin, A. Transdiagnostic impairment of cognitive control in mental illness. *Journal of Psychiatric Research* **C**, doi:10.1016/j.jpsychires.2016.08.001 (2016).
- 37 Barch, D. M. The Neural Correlates of Transdiagnostic Dimensions of Psychopathology. *The American Journal of Psychiatry* **174**, doi:10.1176/appi.ajp.2017.17030289 (2017).
- 38 Smucny, J. *et al.* Levels of Cognitive Control: A Functional Magnetic Resonance Imaging-Based Test of an RDoC Domain Across Bipolar Disorder and Schizophrenia. *Neuropsychopharmacology* **43**, doi:10.1038/npp.2017.233 (2017).
- 39 Kubera, K. M., Hirjak, D., Wolf, N. D. & Wolf, R. C. Cognitive control in the research domain criteria system: clinical implications for auditory verbal hallucinations. *Der Nervenarzt* **92**, doi:10.1007/s00115-021-01175-0 (2021).
- 40 Tottenham, N. *et al.* The NimStim set of facial expressions: Judgments from untrained research participants. *Psychiatry Research* **168**, doi:10.1016/j.psychres.2008.05.006 (2009).
- 41 Kleinhans, N. M. *et al.* Reduced Neural Habituation in the Amygdala and Social Impairments in Autism Spectrum Disorders. *American Journal of Psychiatry* **166**, doi:10.1176/appi.ajp.2008.07101681 (2009).
- 42 Kamp-Becker, I. *et al.* Study protocol of the ASD-Net, the German research consortium for the study of Autism Spectrum Disorder across the lifespan: from a better etiological understanding, through valid diagnosis, to more effective health care. *BMC Psychiatry* **17**, doi:10.1186/s12888-017-1362-7 (2017).
- 43 Phan, K. L., Fitzgerald, D. A., Nathan, P. J. & Tancer, M. E. Association between Amygdala Hyperactivity to Harsh Faces and Severity of Social Anxiety in Generalized Social Phobia. *Biological Psychiatry* **59**, doi:10.1016/j.biopsych.2005.08.012 (2006).
- 44 Shin, L. M., Liberzon, I., Shin, L. M. & Liberzon, I. The Neurocircuitry of Fear, Stress, and Anxiety Disorders. *Neuropsychopharmacology* **35**, doi:10.1038/npp.2009.83 (2009).
- 45 Pitman, R. K. *et al.* Biological studies of post-traumatic stress disorder. *Nature Reviews Neuroscience* **13**, doi:10.1038/nrn3339 (2012).
- 46 Kanske, P., Schönfelder, S., Forneck, J. & Wessa, M. Impaired regulation of emotion: neural correlates of reappraisal and distraction in bipolar disorder and unaffected relatives. *Translational Psychiatry* **5**, doi:10.1038/tp.2014.137 (2015).
- 47 Contreras-Rodríguez, O. *et al.* Disrupted neural processing of emotional faces in psychopathy. *Social Cognitive and Affective Neuroscience* **9**, doi:10.1093/scan/nst014 (2014).
- 48 Stein, M. B., Goldin, P. R., Sareen, J., Eyler Zorrilla, L. T. & Brown, G. G. Increased Amygdala Activation to Angry and Contemptuous Faces in Generalized Social Phobia. *Archives of General Psychiatry* **59**, doi:10.1001/archpsyc.59.11.1027 (2002).
- 49 Davidson, J., Turnbull, C. D., Strickland, R., Miller, R. & Graves, K. The Montgomery-Åsberg Depression Scale: reliability and validity. *Acta Psychiatrica Scandinavica* **73**, doi:10.1111/j.1600-0447.1986.tb02723.x (1986).
- 50 Lovibond, P. F. & Lovibond, S. H. The structure of negative emotional states: Comparison of the Depression Anxiety Stress Scales (DASS) with the Beck Depression and Anxiety Inventories. *Behaviour Research and Therapy* **33**, doi:10.1016/0005-7967(94)00075-U (1995).
- 51 Kay, S. R., Fiszbein, A. & Opler, L. A. The Positive and Negative Syndrome Scale (PANSS) for Schizophrenia. *Schizophrenia Bulletin* **13**, doi:10.1093/schbul/13.2.261 (1987).
- 52 Young, R. C., Biggs, J. T., Ziegler, V. E. & Meyer, D. A. A Rating Scale for Mania: Reliability, Validity and Sensitivity. *The British Journal of Psychiatry* **133**, doi:10.1192/bjp.133.5.429 (1978).
- 53 Cloninger, C. R. A Systematic Method for Clinical Description and Classification of Personality Variants. *Archives of General Psychiatry* **44**, doi:10.1001/archpsyc.1987.01800180093014 (1987).



- 54 Gard, D. E., Germans Gard, M., Kring, A. M. & John, O. P. Anticipatory and consummatory components of the experience of pleasure: A scale development study. *Journal of Research in Personality* **40**, doi:10.1016/j.jrp.2005.11.001 (2006).
- 55 Brennan, K. A., Clark, C. L. & Shaver, P. R. in *Attachment theory and close relationships* (eds J. A. Simpson & W. S. Rholes) 46-76 (The Guilford Press, 1998).
- 56 Cyders, M. A. *et al.* Integration of impulsivity and positive mood to predict risky behavior: Development and validation of a measure of positive urgency. *Psychological Assessment* **19**, doi:10.1037/1040-3590.19.1.107 (2007).
- 57 Shipley, W. C. Shipley institute of living scale. *The Journal of Psychology: Interdisciplinary and Applied* (1986).
- 58 Garnefski, N. & Kraaij, V. The Cognitive Emotion Regulation Questionnaire. *European Journal of Psychological Assessment* **23**, doi:10.1027/1015-5759.23.3.141 (2007).
- 59 Broadbent, D. E., Cooper, P. F., FitzGerald, P. & Parkes, K. R. The Cognitive Failures Questionnaire (CFQ) and its correlates. *British Journal of Clinical Psychology* **21**, doi:10.1111/j.2044-8260.1982.tb01421.x (1982).
- 60 Frederick, S. Cognitive Reflection and Decision Making. *Journal of Economic Perspectives* **19**, doi:10.1257/089533005775196732 (2005).
- 61 First, M. B., Williams, J. B. W., Karg, R. S. & Spitzer, R. L. *Structured Clinical Interview for DSM-5 Research Version SCID-5-RV*. (American Psychiatric Association, 2015).
- 62 Busner, J. & Targum, S. D. The clinical global impressions scale: applying a research tool in clinical practice. *Psychiatry (edgmont)* **4**, 28 (2007).
- 63 Posner, K. *et al.* The Columbia–Suicide Severity Rating Scale: Initial Validity and Internal Consistency Findings From Three Multisite Studies With Adolescents and Adults. *American Journal of Psychiatry*, doi:10.1176/appi.ajp.2011.10111704 (2011).
- 64 Leon, A. C. *et al.* The Range of Impaired Functioning Tool (LIFE–RIFT): a brief measure of functional impairment. *Psychological Medicine* **29**, doi:10.1017/S0033291799008570 (1999).
- 65 Hendryx, M., Dyck, D. G., McBride, D. & Whitbeck, J. A Test of the Reliability and Validity of the Multnomah Community Ability Scale. *Community Mental Health Journal* **37**, doi:10.1023/A:1002713816110 (2001).
- 66 Shear, M. K. *et al.* Multicenter Collaborative Panic Disorder Severity Scale. *American Journal of Psychiatry* **154**, doi:10.1176/ajp.154.11.1571 (2006).
- 67 Istvan, J. & Matarazzo, D. Tobacco, alcohol, and caffeine use: A review of their interrelationships. *Psychological Bulletin* **95**, doi:10.1037/0033-2909.95.2.301 (1984).
- 68 Hurley, R. S. E., Losh, M., Parlier, M., Reznick, J. S. & Piven, J. The Broad Autism Phenotype Questionnaire. *Journal of Autism and Developmental Disorders* **37**, doi:10.1007/s10803-006-0299-3 (2006).
- 69 Patton, J. H., Stanford, M. S. & Barratt, E. S. Factor structure of the barratt impulsiveness scale. *Journal of Clinical Psychology* **51**, doi:10.1002/1097-4679(199511)51:6<768::AID-JCLP2270510607>3.0.CO;2-1 (1995).
- 70 Carver, C. S. & White, T. L. Behavioral inhibition, behavioral activation, and affective responses to impending reward and punishment: The BIS/BAS Scales. *Journal of Personality and Social Psychology* **67**, doi:10.1037/0022-3514.67.2.319 (1994).
- 71 Pennebaker, J. W. & Susman, J. R. Disclosure of traumas and psychosomatic processes. *Social Science & Medicine* **26**, doi:10.1016/0277-9536(88)90397-8 (1988).

- 72 Weber, E. U., Blais, A.-R. & Betz, N. E. A domain-specific risk-attitude scale: measuring risk perceptions and risk behaviors. *Journal of Behavioral Decision Making* **15**, doi:10.1002/bdm.414 (2002).
- 73 Radzius, A. *et al.* A factor analysis of the Fagerström Test for Nicotine Dependence (FTND). *Nicotine & Tobacco Research* **5**, doi:10.1080/1462220031000073289 (2003).
- 74 Zimet, G. D., Dahlem, N. W., Zimet, S. G. & Farley, G. K. The Multidimensional Scale of Perceived Social Support. *Journal of Personality Assessment*, doi:10.1207/s15327752jpa5201\_2 (1988).
- 75 Costa, P. T. & McCrae, R. R. *NEO-FFI NEO Five-Factor Inventory Test Booklet-Form S (Adult)*. (Psychological Assessment Resources, Inc., 2003).
- 76 Rush, A. J. *et al.* The 16-Item quick inventory of depressive symptomatology (QIDS), clinician rating (QIDS-C), and self-report (QIDS-SR): a psychometric evaluation in patients with chronic major depression. *Biological Psychiatry* **5**, doi:10.1016/S0006-3223(02)01866-8 (2003).
- 77 Spielberger, C. D. State-Trait Anxiety Inventory for Adults. *APA PsycTests*, doi:<https://doi.org/10.1037/t06496-000> (1983).
- 78 Reiss, S., Peterson, R. A., Gursky, D. M. & McNally, R. J. Anxiety sensitivity, anxiety frequency and the prediction of fearfulness. *Behaviour Research and Therapy* **24**, doi:10.1016/0005-7967(86)90143-9 (1986).
- 79 McNair, D. M., Lorr, M. & Droppleman, L. F. Profile of mood states. *Educational & Industrial Testing Service* (1981).
- 80 Cohen, S., Kamarck, T. & Mermelstein, R. A Global Measure of Perceived Stress. *Journal of Health and Social Behavior* **24**, doi:10.2307/2136404 (1983).
- 81 Shipley, W. C. *Shipley Institute of Living Scale Administration Form*. (Western Psychological Services, 1967).
- 82 DeKosky, S. T., Heilman, K. M., Bowers, D. & Valenstein, E. Recognition and discrimination of emotional faces and pictures. *Brain and Language* **9**, doi:10.1016/0093-934X(80)90141-8 (1980).
- 83 Treynor, W., Gonzalez, R. & Nolen-Hoeksema, S. Rumination Reconsidered: A Psychometric Analysis. *Cognitive Therapy and Research* **27**, doi:10.1023/A:1023910315561 (2003).
- 84 Reznick, J. S. & Snidman, N. C. Retrospective Self-Report in inhibited and uninhibited children. *Hokkaido University Collection of Scholarly and Academic Papers (HUSCAP)* (1991).
- 85 Snaith, R. P. *et al.* A scale for the assessment of hedonic tone the Snaith–Hamilton Pleasure Scale. *The British Journal of Psychiatry* **167**, 99-103, doi:<https://doi.org/10.1192/bjp.167.1.99> (1995).
- 86 Li, X., Morgan, P. S., Ashburner, J., Smith, J. & Rorden, C. The first step for neuroimaging data analysis: DICOM to NIfTI conversion. *Journal of Neuroscience Methods* **264**, doi:10.1016/j.jneumeth.2016.03.001 (2016).
- 87 Gorgolewski, K. J. *et al.* The brain imaging data structure, a format for organizing and describing outputs of neuroimaging experiments. *Scientific Data* **3**, doi:10.1038/sdata.2016.44 (2016).
- 88 Muschelli, J., Sweeney, E., Lindquist, M. & Crainiceanu, C. fsLR: Connecting the FSL Software with R. *The R Journal* **7**, 163-175 (2015).
- 89 Jenkinson, M., Beckmann, C. F., Behrens, T. E., Woolrich, M. W. & Smith, S. M. FSL. *NeuroImage* **62**, doi:10.1016/j.neuroimage.2011.09.015 (2012).
- 90 Gulban, O. F. *et al.* poldracklab/pydeface: PyDeface v2.0.2. doi:10.5281/zenodo.6856482 (2022).
- 91 Rubinov, M. & Sporns, O. Complex network measures of brain connectivity: Uses and interpretations. *NeuroImage* **3**, doi:10.1016/j.neuroimage.2009.10.003 (2010).

- 92 Glasser, M. F. *et al.* The minimal preprocessing pipelines for the Human Connectome Project. *NeuroImage Complete*, doi:10.1016/j.neuroimage.2013.04.127 (2013).
- 93 Glasser, M. F. *et al.* A multi-modal parcellation of human cerebral cortex. *Nature* **536**, doi:10.1038/nature18933 (2016).
- 94 Fischl, B. FreeSurfer. *NeuroImage* **62**, doi:10.1016/j.neuroimage.2012.01.021 (2012).
- 95 Moeller, S. *et al.* Multiband multislice GE-EPI at 7 tesla, with 16-fold acceleration using partial parallel imaging with application to high spatial and temporal whole-brain fMRI. *Magnetic resonance in medicine* **63**, doi:10.1002/mrm.22361 (2010).
- 96 Risk, B. B. *et al.* Which multiband factor should you choose for your resting-state fMRI study? *NeuroImage* **234**, doi:10.1016/j.neuroimage.2021.117965 (2021).
- 97 Van Essen, D. C., Glasser, M. F., Dierker, D. L., Harwell, J. & Coalson, T. Parcellations and Hemispheric Asymmetries of Human Cerebral Cortex Analyzed on Surface-Based Atlases. *Cerebral Cortex* **22**, doi:10.1093/cercor/bhr291 (2012).
- 98 Andersson, J. L. R., Skare, S. & Ashburner, J. How to correct susceptibility distortions in spin-echo echo-planar images: application to diffusion tensor imaging. *NeuroImage* **20**, doi:10.1016/S1053-8119(03)00336-7 (2003).
- 99 Smith, S. M. *et al.* Advances in functional and structural MR image analysis and implementation as FSL. *NeuroImage* **23 Suppl 1**, doi:10.1016/j.neuroimage.2004.07.051 (2004).
- 100 Salimi-Khorshidi, G. *et al.* Automatic denoising of functional MRI data: Combining independent component analysis and hierarchical fusion of classifiers. *NeuroImage* **90**, doi:10.1016/j.neuroimage.2013.11.046 (2014).
- 101 Griffanti, L. *et al.* ICA-based artefact removal and accelerated fMRI acquisition for improved resting state network imaging. *NeuroImage Complete*, doi:10.1016/j.neuroimage.2014.03.034 (2014).
- 102 Aguirre, G. K., Zarahn, E. & D'Esposito, M. The inferential impact of global signal covariates in functional neuroimaging analyses. *NeuroImage* **8**, doi:10.1006/nimg.1998.0367 (1998).
- 103 Macey, P. M., Macey, K. E., Kumar, R. & Harper, R. M. A method for removal of global effects from fMRI time series. *NeuroImage* **22**, doi:10.1016/j.neuroimage.2003.12.042 (2004).
- 104 Murphy, K. & Fox, M. D. Towards a consensus regarding global signal regression for resting state functional connectivity MRI. *NeuroImage* **154**, doi:10.1016/j.neuroimage.2016.11.052 (2017).
- 105 Liu, T. T., Nalci, A. & Falahpour, M. The global signal in fMRI: Nuisance or Information? *NeuroImage* **150**, doi:10.1016/j.neuroimage.2017.02.036 (2017).
- 106 Power, J. D. *et al.* Methods to detect, characterize, and remove motion artifact in resting state fMRI. *NeuroImage Complete*, doi:10.1016/j.neuroimage.2013.08.048 (2014).
- 107 Parkes, L., Fulcher, B., Yucel, M. & Foniato, A. An evaluation of the efficacy, reliability, and sensitivity of motion correction strategies for resting-state functional MRI. *NeuroImage* **171**, doi:10.1016/j.neuroimage.2017.12.073 (2018).
- 108 Aquino, K. M., Fulcher, B. D., Parkes, L., Sabaroeidin, K. & Fornito, A. Identifying and removing widespread signal deflections from fMRI data: Rethinking the global signal regression problem. *NeuroImage* **212**, doi:10.1016/j.neuroimage.2020.116614 (2020).
- 109 Li, J. *et al.* Topography and behavioral relevance of the global signal in the human brain. *Scientific Reports* **9**, doi:10.1038/s41598-019-50750-8 (2019).
- 110 Uddin, L. Q. Mixed Signals: On Separating Brain Signal from Noise. *Trends in Cognitive Sciences* **21**, doi:10.1016/j.tics.2017.04.002 (2017).
- 111 Uddin, L. Q. Bring the Noise: Reconceptualizing Spontaneous Neural Activity. *Trends in Cognitive Sciences* **24**, doi:10.1016/j.tics.2020.06.003 (2020).

- 112 Burgess, G. C. *et al.* Evaluation of Denoising Strategies to Address Motion-Related Artifacts in Resting-State Functional Magnetic Resonance Imaging Data from the Human Connectome Project. *Brain Connectivity*, doi:10.1089/brain.2016.0435 (2016).
- 113 Yan, X. *et al.* Homotopic local-global parcellation of the human cerebral cortex from resting-state functional connectivity. *NeuroImage* **273**, doi:10.1016/j.neuroimage.2023.120010 (2023).
- 114 Schaefer, A. *et al.* Local-Global Parcellation of the Human Cerebral Cortex from Intrinsic Functional Connectivity MRI. *Cerebral Cortex* **28**, doi:10.1093/cercor/bhx179 (2018).
- 115 Tian, Y. *et al.* Topographic organization of the human subcortex unveiled with functional connectivity gradients. *Nature Neuroscience* **23**, doi:10.1038/s41593-020-00711-6 (2020).
- 116 Buckner, R. L., Krienen, F. M., Castellanos, A., Diaz, J. C. & Yeo, B. T. T. The organization of the human cerebellum estimated by intrinsic functional connectivity. *Journal of Neurophysiology* **106**, doi:10.1152/jn.00339.2011 (2011).
- 117 Van Dijk, K. R. A., Sabuncu, M. R. & Buckner, R. L. The Influence of Head Motion on Intrinsic Functional Connectivity MRI. *NeuroImage* **59**, doi:10.1016/j.neuroimage.2011.07.044 (2012).
- 118 Power, J. D., Barnes, K. A., Snyder, A. Z., Schlaggar, B. L. & Petersen, S. E. Spurious but systematic correlations in functional connectivity MRI networks arise from subject motion. *NeuroImage* **59**, doi:10.1016/j.neuroimage.2011.10.018 (2012).
- 119 Ciric, R. *et al.* Mitigating head motion artifact in functional connectivity MRI. *Nature Protocols* **13**, doi:10.1038/s41596-018-0065-y (2018).
- 120 Jenkinson, M., Bannister, P., Brady, M. & Smith, S. Improved Optimization for the Robust and Accurate Linear Registration and Motion Correction of Brain Images. *NeuroImage* **17**, doi:10.1006/nimg.2002.1132 (2002).
- 121 Power, J. D. *et al.* Distinctions among real and apparent respiratory motions in human fMRI data. *NeuroImage* **201**, doi:10.1016/j.neuroimage.2019.116041 (2019).
- 122 Power, J. D., Schlaggar, B. L. & Petersen, S. E. Recent progress and outstanding issues in motion correction in resting state fMRI. *NeuroImage* **0**, doi:10.1016/j.neuroimage.2014.10.044 (2015).
- 123 Yeo, B. T. T. *et al.* The organization of the human cerebral cortex estimated by intrinsic functional connectivity. *Journal of Neurophysiology* **106**, doi:10.1152/jn.00338.2011 (2011).
- 124 Anderson, K. M. *et al.* Heritability of individualized cortical network topography. *Proceedings of the National Academy of Sciences* **118**, doi:10.1073/pnas.2016271118 (2021).
- 125 Kong, R. *et al.* Spatial Topography of Individual-Specific Cortical Networks Predicts Human Cognition, Personality, and Emotion. *Cerebral Cortex* **29**, doi:10.1093/cercor/bhy123 (2019).
- 126 Reinen, J. M. *et al.* The human cortex possesses a reconfigurable dynamic network architecture that is disrupted in psychosis. *Nature Communications* **2018** 9:1 **9**, doi:10.1038/s41467-018-03462-y (2018).
- 127 Fair, D. A. *et al.* A method for using blocked and event-related fMRI data to study "resting state" functional connectivity. *NeuroImage* **35**, doi:10.1016/j.neuroimage.2006.11.051 (2007).
- 128 Cole, Michael W., Bassett, Danielle S., Power, Jonathan D., Braver, Todd S. & Petersen, Steven E. Intrinsic and Task-Evoked Network Architectures of the Human Brain. *Neuron* **83**, doi:10.1016/j.neuron.2014.05.014 (2014).
- 129 Krienen, F. M., Yeo, B. T. T. & Buckner, R. L. Reconfigurable task-dependent functional coupling modes cluster around a core functional architecture. *Philosophical Transactions of the Royal Society B: Biological Sciences*, doi:10.1098/rstb.2013.0526 (2014).
- 130 Gratton, C. *et al.* Functional Brain Networks Are Dominated by Stable Group and Individual Factors, Not Cognitive or Daily Variation. *Neuron* **98**, doi:10.1016/j.neuron.2018.03.035 (2018).

- 131 Cole, M. W., Ito, T., Cocuzza, C. V. & Sanchez-Romero, R. The Functional Relevance of Task-State Functional Connectivity. *Journal of Neuroscience* **41**, doi:10.1523/JNEUROSCI.1713-20.2021 (2021).
- 132 Ito, T. *et al.* Task-evoked activity quenches neural correlations and variability across cortical areas. *PLOS Computational Biology* **16**, doi:10.1371/journal.pcbi.1007983 (2020).
- 133 Mantel, N. The Detection of Disease Clustering and a Generalized Regression Approach. *Cancer Research* **27**, 209-220 (1967).
- 134 Wang, J., Zuo, X. N. & Yong, H. Graph-based network analysis of resting-state functional MRI. *Frontiers in systems neuroscience* **4**, doi:10.3389/fnsys.2010.00016 (2010).
- 135 Fornito, A., Zalesky, A. & Breakspear, M. Graph analysis of the human connectome: promise, progress, and pitfalls. *NeuroImage* **80**, doi:10.1016/j.neuroimage.2013.04.087 (2013).
- 136 Telesford, Q., Burdette, J. H. & Laurienti, P. J. An exploration of graph metric reproducibility in complex brain networks. *Frontiers in neuroscience* **7**, doi:10.3389/fnins.2013.00067 (2013).
- 137 Fornito, A., Zalesky, A. & Bullmore, E. T. Fundamentals of Brain Network Analysis. *Fundamentals of Brain Network Analysis*, doi:10.1016/B978-0-12-407908-3.09999-4 (2016).
- 138 Bassett, D. S. & Sporns, O. Network neuroscience. *Nature Neuroscience* **20**, doi:10.1038/nn.4502 (2017).
- 139 Medaglia, J. D. Graph Theoretic Analysis of Resting State Functional MR Imaging. *Neuroimaging Clinics* **27**, doi:10.1016/j.nic.2017.06.008 (2017).
- 140 Wills, P. & Meyer, F. G. Metrics for graph comparison: A practitioner's guide. *PLOS ONE* **15**, doi:10.1371/journal.pone.0228728 (2020).
- 141 Bassett, D. S. *et al.* Robust detection of dynamic community structure in networks. *Chaos: An Interdisciplinary Journal of Nonlinear Science* **23**, doi:10.1063/1.4790830 (2013).
- 142 Onnela, J.-P., Saramäki, J., Kertész, J. & Kaski, K. Intensity and coherence of motifs in weighted complex networks. *Physical Review E* **71**, doi:10.1103/PhysRevE.71.065103 (2005).
- 143 Watts, D. J. & Strogatz, S. H. Collective dynamics of 'small-world' networks. *Nature* **393**, doi:10.1038/30918 (1998).
- 144 Muldoon, S. F., Bridgeford, E. W. & Bassett, D. S. Small-World Propensity and Weighted Brain Networks. *Scientific Reports* **6**, doi:10.1038/srep22057 (2016).
- 145 Masuda, N., Sakaki, M., Ezaki, T. & Watanabe, T. Clustering Coefficients for Correlation Networks. *Frontiers in Neuroinformatics* **12**, doi:10.3389/fninf.2018.00007 (2018).
- 146 Raj, A. & Chen, Y.-h. The Wiring Economy Principle: Connectivity Determines Anatomy in the Human Brain. *PLOS ONE* **6**, doi:10.1371/journal.pone.0014832 (2011).
- 147 Tomasi, D., Wang, G.-J. & Volkow, N. D. Energetic cost of brain functional connectivity. *Proceedings of the National Academy of Sciences* **110**, doi:10.1073/pnas.1303346110 (2013).
- 148 Fox, M. D. *et al.* The human brain is intrinsically organized into dynamic, anticorrelated functional networks. *Proceedings of the National Academy of Sciences* **102**, doi:10.1073/pnas.0504136102 (2005).
- 149 Spreng, R. N. The Fallacy of a "Task-Negative" Network. *Frontiers in Psychology* **3**, doi:10.3389/fpsyg.2012.00145 (2012).
- 150 Wasserman, S. & Faust, K. Social network analysis: Methods and applications. *Cambridge University Press*, doi:<https://doi.org/10.1017/CBO9780511815478> (1994).
- 151 Brandes, U. A faster algorithm for betweenness centrality. *Journal of Mathematical Sociology* **25**, doi:10.1080/0022250X.2001.9990249 (2001).

- 152 Boccaletti, S., Latora, V., Moreno, Y., Chavez, M. & Hwang, D.-U. Complex networks: Structure and dynamics. *Physics Reports* **424**, doi:10.1016/j.physrep.2005.10.009 (2006).
- 153 Zuo, X.-N. *et al.* Network Centrality in the Human Functional Connectome. *Cerebral Cortex* **22**, doi:10.1093/cercor/bhr269 (2012).
- 154 Dosenbach, N. U. *et al.* A Core System for the Implementation of Task Sets. *Neuron* **50**, doi:10.1016/j.neuron.2006.04.031 (2006).
- 155 Marek, S. & Dosenbach, N. U. F. The frontoparietal network: function, electrophysiology, and importance of individual precision mapping. *Dialogues in Clinical Neuroscience* **20**, doi:10.31887/DCNS.2018.20.2/smarek (2018).
- 156 Kotov, R. *et al.* The hierarchical taxonomy of psychopathology (HiTOP): A dimensional alternative to traditional nosologies. *Journal of abnormal psychology* **126**, doi:10.1037/abn0000258 (2017).
- 157 Varga, T. V. & Westergaard, D. *missCompare: Intuitive Missing Data Imputation Framework*, <<https://CRAN.R-project.org/package=missCompare>> (2020).
- 158 Stekhoven, D. J. & Bühlmann, P. MissForest—non-parametric missing value imputation for mixed-type data. *Bioinformatics* **28**, doi:10.1093/bioinformatics/btr597 (2012).
- 159 Peterson, R. Finding Optimal Normalizing Transformations via best Normalize. *R Journal* **13** (2021).
- 160 Lindquist, M. A., Loh, J. M., Atlas, L. Y. & Wager, T. D. Modeling the hemodynamic response function in fMRI: Efficiency, bias and mis-modeling. *NeuroImage* **45**, doi:10.1016/j.neuroimage.2008.10.065 (2009).
- 161 Benjamini, Y. & Hochberg, Y. Controlling the False Discovery Rate: A Practical and Powerful Approach to Multiple Testing. *Journal of the Royal Statistical Society: Series B (Methodological)* **57**, doi:10.1111/j.2517-6161.1995.tb02031.x (1995).
- 162 MacLeod, C. M. & MacDonald, P. A. Interdimensional interference in the Stroop effect: uncovering the cognitive and neural anatomy of attention. *Trends in Cognitive Sciences* **4**, doi:10.1016/S1364-6613(00)01530-8 (2000).
- 163 Littman, R., Keha, E. & Kalanthroff, E. Task Conflict and Task Control: A Mini-Review. *Frontiers in Psychology* **10**, doi:10.3389/fpsyg.2019.01598 (2019).
- 164 Preckel, K. *et al.* Neural mechanisms of affective matching across faces and scenes. *Scientific Reports* **9**, doi:10.1038/s41598-018-37163-9 (2019).

## Acknowledgments

This work was supported by the National Institute of Mental Health (R01MH123245 to AJH and R01MH120080 to AJH and BTTY). BTTY is also supported by the NUS Yong Loo Lin School of Medicine (NUHSRO/2020/124/TMR/LOA), the Singapore National Medical Research Council (NMRC) LCG (OFLCG19May-0035), NMRC CTG-IIT (CTGIIT23jan-0001), NMRC STaR (STaR20nov-0003), Singapore Ministry of Health (MOH) Centre Grant (CG21APR1009), the Temasek Foundation (TF2223-IMH-01), and the United States National Institutes of Health (R01MH120080). Any opinions, findings and conclusions or recommendations expressed in this

material are those of the authors and do not reflect the views of the grantors. SC is supported by an American Australian Association Graduate Education Fund Scholarship. JAR is supported by the Stanford University Knight-Hennessy Scholars Program, and the National Academies of Sciences, Engineering, and Medicine's Ford Foundation Predoctoral Fellowship. LMP is supported by a T32 Fellowship from the National Institute of Mental Health (T32MH019112-32).

## Supplementary information

**Table S1. Summary metrics for scales and subscales.**

| Variable         | Missing (%) | Median | Mean   | Min   | Max      |
|------------------|-------------|--------|--------|-------|----------|
| ASC              | 58.70       | 251.00 | 434.01 | 0.00  | 2,050.00 |
| ASI              | 10.12       | 15.50  | 17.53  | 0.00  | 59.00    |
| ATC              | 9.72        | 10.00  | 9.96   | 3.00  | 24.00    |
| BAPQ-Aloof       | 14.57       | 2.75   | 2.83   | 1.17  | 5.92     |
| BAPQ-PragLang    | 14.57       | 2.67   | 2.76   | 1.17  | 4.17     |
| BAPQ-Rigid       | 14.57       | 3.00   | 3.02   | 1.42  | 4.75     |
| BAS-Drive        | 9.31        | 11.00  | 10.83  | 4.00  | 16.00    |
| BAS-FS           | 9.31        | 11.00  | 11.27  | 5.00  | 16.00    |
| BAS-RR           | 9.31        | 17.00  | 16.93  | 8.00  | 20.00    |
| BIS-1            | 16.19       | 9.00   | 9.82   | 5.00  | 20.00    |
| BIS-11           | 9.31        | 21.00  | 20.74  | 7.00  | 28.00    |
| BIS-2            | 16.19       | 13.00  | 13.94  | 7.00  | 25.00    |
| BIS-3            | 16.19       | 11.00  | 11.61  | 6.00  | 21.00    |
| BIS-4            | 16.19       | 10.00  | 10.41  | 5.00  | 17.00    |
| BIS-5            | 16.19       | 7.00   | 7.37   | 4.00  | 14.00    |
| BIS-6            | 16.19       | 5.00   | 5.80   | 3.00  | 11.00    |
| BIS-AI           | 16.19       | 22.00  | 22.01  | 12.00 | 35.00    |
| BIS-MI           | 16.19       | 21.00  | 21.31  | 13.00 | 34.00    |
| BIS-NP           | 16.19       | 15.00  | 15.62  | 8.00  | 30.00    |
| CERQ-Acceptance  | 9.31        | 8.00   | 7.25   | 2.00  | 10.00    |
| CERQ-Catastrophe | 9.31        | 5.00   | 5.02   | 2.00  | 10.00    |
| CERQ-OtherBlame  | 9.31        | 4.00   | 4.12   | 2.00  | 9.00     |
| CERQ-Perspective | 9.31        | 7.00   | 6.69   | 2.00  | 10.00    |
| CERQ-PosAppraise | 9.31        | 8.00   | 7.63   | 2.00  | 10.00    |
| CERQ-PosRefocus  | 9.31        | 5.00   | 5.14   | 2.00  | 10.00    |
| CERQ-RefocusPlan | 9.31        | 8.00   | 7.65   | 2.00  | 10.00    |
| CERQ-Ruminate    | 9.31        | 7.00   | 6.64   | 2.00  | 10.00    |
| CERQ-SelfBlame   | 9.31        | 7.00   | 6.47   | 2.00  | 10.00    |
| CFQ-Distract     | 8.10        | 13.00  | 12.86  | 0.00  | 30.00    |
| CFQ-Faltrig      | 8.10        | 9.00   | 9.73   | 0.00  | 27.00    |
| CFQ-Forget       | 8.10        | 13.00  | 14.21  | 0.00  | 31.00    |
| CGI              | 7.29        | 1.00   | 1.13   | 0.50  | 3.50     |
| CRT              | 5.26        | 1.00   | 1.26   | 0.00  | 3.00     |
| CSSRS-I          | 4.05        | 0.00   | 5.98   | 0.00  | 24.00    |
| CTQ-EA           | 20.65       | 8.88   | 9.95   | 5.00  | 25.00    |
| CTQ-EN           | 20.65       | 10.00  | 10.70  | 5.00  | 25.00    |
| CTQ-PA           | 20.65       | 5.00   | 7.07   | 5.00  | 23.00    |
| CTQ-PN           | 20.65       | 6.00   | 7.43   | 5.00  | 20.00    |
| CTQ-SA           | 20.65       | 5.00   | 7.04   | 5.00  | 25.00    |
| CTQ-VA           | 20.65       | 0.00   | 0.40   | 0.00  | 3.00     |



|                   |       |        |        |        |          |
|-------------------|-------|--------|--------|--------|----------|
| DASS-Anxiety      | 6.48  | 3.00   | 5.36   | 0.00   | 32.00    |
| DASS-Depression   | 6.48  | 3.00   | 7.97   | 0.00   | 40.00    |
| DASS-Stress       | 6.48  | 6.00   | 8.75   | 0.00   | 39.00    |
| ECRR-Anxiety      | 9.72  | 3.82   | 3.83   | 2.61   | 5.12     |
| ECRR-Avoidance    | 9.72  | 3.83   | 3.87   | 1.67   | 5.78     |
| FTND              | 6.07  | 0.00   | 0.25   | 0.00   | 7.00     |
| HammerFaces-RT    | 9.72  | 828.27 | 837.08 | 520.35 | 1,619.70 |
| HammerShapes-RT   | 9.72  | 733.32 | 748.47 | 458.36 | 1,468.65 |
| LIFE-RIFT         | 14.98 | 6.00   | 6.99   | 4.00   | 19.00    |
| MADRS             | 6.07  | 3.00   | 7.15   | 0.00   | 39.00    |
| MCAS              | 7.69  | 84.00  | 81.96  | 59.00  | 89.00    |
| MSPSS-Fam         | 12.15 | 5.50   | 5.22   | 1.00   | 7.00     |
| MSPSS-Fri         | 12.15 | 6.00   | 5.61   | 1.00   | 7.00     |
| MSPSS-SO          | 12.15 | 6.00   | 5.44   | 1.00   | 7.00     |
| NEO-AG            | 17.00 | 35.00  | 34.18  | 17.00  | 48.00    |
| NEO-CO            | 17.00 | 33.00  | 32.80  | 6.00   | 48.00    |
| NEO-EX            | 17.00 | 27.00  | 27.40  | 3.00   | 45.00    |
| NEO-NE            | 18.22 | 22.00  | 22.62  | 1.00   | 45.00    |
| NEO-OP            | 17.00 | 32.00  | 30.87  | 12.00  | 45.00    |
| PANSS-G           | 7.29  | 19.00  | 21.10  | 16.00  | 47.00    |
| PANSS-N           | 6.88  | 7.00   | 9.22   | 7.00   | 28.00    |
| PANSS-P           | 7.29  | 7.00   | 8.21   | 7.00   | 30.00    |
| PDSS              | 12.15 | 0.00   | 0.23   | 0.00   | 6.00     |
| POMS-Confusion    | 10.12 | 40.00  | 41.52  | 33.00  | 67.00    |
| POMS-Depression   | 10.12 | 38.00  | 39.79  | 32.00  | 67.00    |
| POMS-Fatigue      | 10.12 | 41.00  | 45.21  | 30.00  | 76.00    |
| POMS-Tension      | 10.12 | 36.00  | 38.33  | 30.00  | 61.00    |
| POMS-Vigor        | 10.12 | 52.00  | 53.17  | 36.00  | 80.00    |
| PSS               | 5.67  | 15.00  | 15.86  | 0.00   | 37.00    |
| PUM               | 10.53 | 19.00  | 22.14  | 14.00  | 56.00    |
| QIDS              | 19.03 | 4.00   | 5.32   | 0.00   | 22.00    |
| RP-Ethical        | 24.70 | 37.00  | 36.66  | 18.00  | 56.00    |
| RP-Financial      | 24.70 | 39.00  | 38.58  | 8.00   | 56.00    |
| RP-Health         | 24.70 | 39.00  | 38.98  | 13.00  | 56.00    |
| RP-Recreational   | 24.70 | 35.50  | 35.01  | 8.00   | 53.00    |
| RP-Social         | 24.70 | 23.00  | 23.68  | 8.00   | 53.00    |
| RRS               | 9.72  | 46.00  | 47.45  | 22.00  | 86.00    |
| RSRI-FearIllness  | 8.91  | 1.83   | 1.95   | 1.00   | 3.67     |
| RSRI-SchoolSocial | 8.91  | 2.50   | 2.44   | 1.08   | 4.42     |
| RT-Ethical        | 24.70 | 18.00  | 18.58  | 8.00   | 37.00    |
| RT-Financial      | 24.70 | 18.00  | 18.58  | 8.00   | 37.00    |
| RT-Health         | 24.70 | 22.00  | 23.15  | 8.00   | 51.00    |
| RT-Recreational   | 24.70 | 27.00  | 27.63  | 8.00   | 56.00    |
| RT-Social         | 24.70 | 39.00  | 38.06  | 14.00  | 56.00    |
| SHAPS             | 12.55 | 0.00   | 1.27   | 0.00   | 12.00    |

|                    |       |        |        |        |          |
|--------------------|-------|--------|--------|--------|----------|
| STAIY-State        | 7.69  | 38.00  | 39.68  | 20.00  | 73.00    |
| STAIY-State1       | 7.69  | 38.00  | 39.68  | 20.00  | 73.00    |
| ShipleyVocab       | 4.45  | 57.00  | 55.97  | 30.00  | 71.00    |
| StroopInc-Accuracy | 25.91 | 46.00  | 44.10  | 18.00  | 48.00    |
| StroopInc-RT       | 25.91 | 901.59 | 913.59 | 500.32 | 1,524.47 |
| TCI-C              | 24.29 | 81.00  | 79.67  | 44.00  | 98.00    |
| TCI-HA             | 24.29 | 57.00  | 57.51  | 24.00  | 95.00    |
| TCI-NS             | 24.29 | 53.00  | 53.90  | 30.00  | 86.00    |
| TCI-P              | 24.29 | 72.00  | 71.24  | 25.00  | 96.00    |
| TCI-RD             | 24.29 | 69.00  | 69.14  | 41.00  | 96.00    |
| TCI-SD             | 24.29 | 76.00  | 74.58  | 46.00  | 98.00    |
| TCI-ST             | 24.29 | 39.00  | 39.96  | 17.00  | 75.00    |
| TEPS-Anticipatory  | 6.88  | 44.00  | 43.29  | 11.00  | 59.00    |
| TEPS-Consume       | 6.88  | 39.00  | 38.10  | 8.00   | 48.00    |
| TMB-Choice         | 12.15 | 11.63  | 11.94  | 3.50   | 47.60    |
| TMB-ContPerform    | 9.72  | 71.87  | 68.20  | 6.25   | 96.87    |
| TMB-DigitSymbol    | 12.55 | 49.00  | 49.02  | 17.00  | 147.00   |
| TMB-FastRT         | 12.15 | 33.16  | 33.00  | 18.45  | 49.45    |
| TMB-MatrixReason   | 11.74 | 24.00  | 22.26  | 4.00   | 34.00    |
| TMB-ReadingMind    | 12.96 | 25.00  | 24.07  | 8.00   | 34.00    |
| TMB-WordAssoc      | 12.96 | 48.00  | 57.69  | 13.00  | 100.00   |
| YMRS               | 7.29  | 0.00   | 1.12   | 0.00   | 34.00    |

**(a) Participant with relatively high mean FD, rest 1 AP**

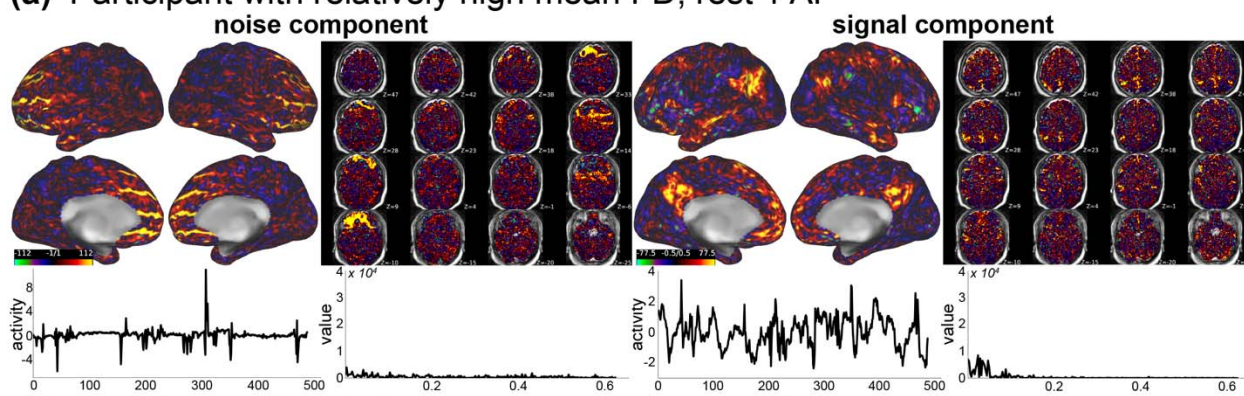

**(b) Participant with relatively low mean FD, rest 1 AP**

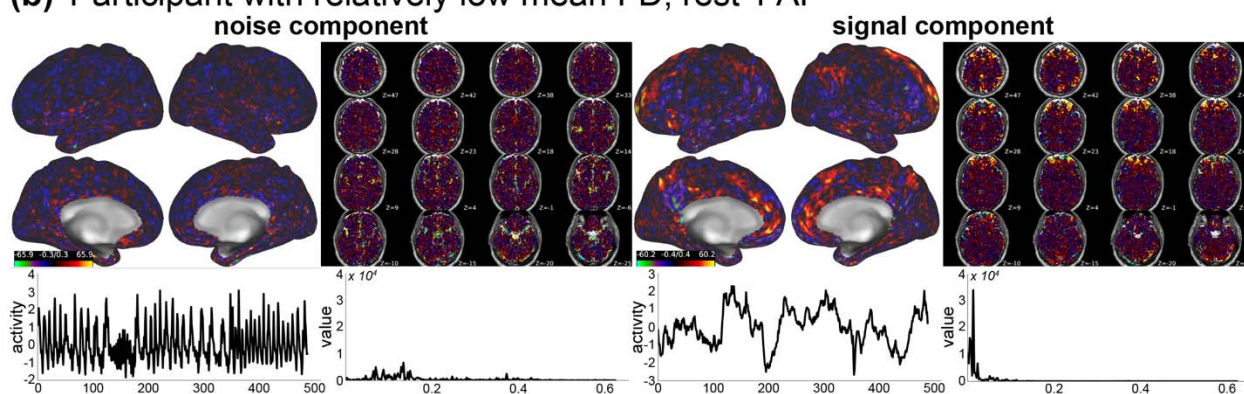

**(c) Participant with relatively high mean FD, task 3 emotional faces AP**

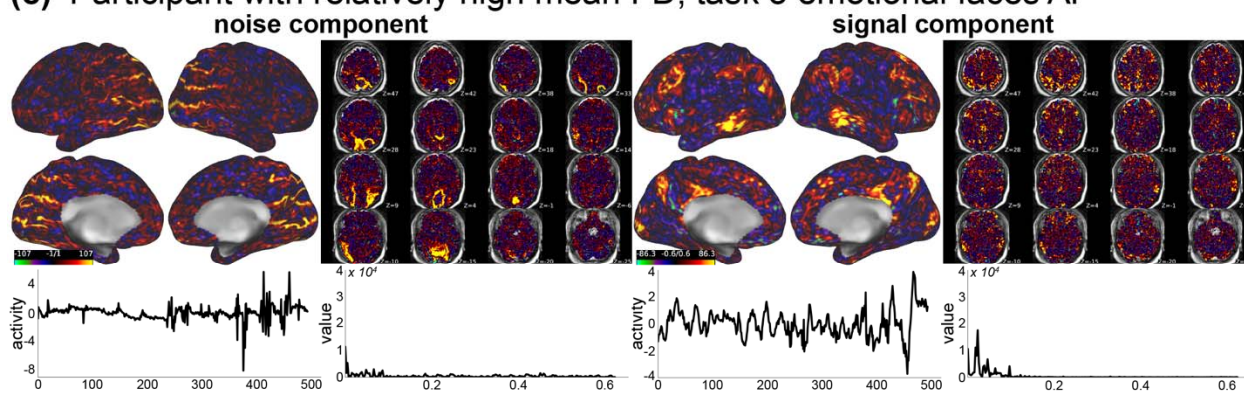

**(d) Participant with relatively low mean FD, task 3 emotional faces AP**

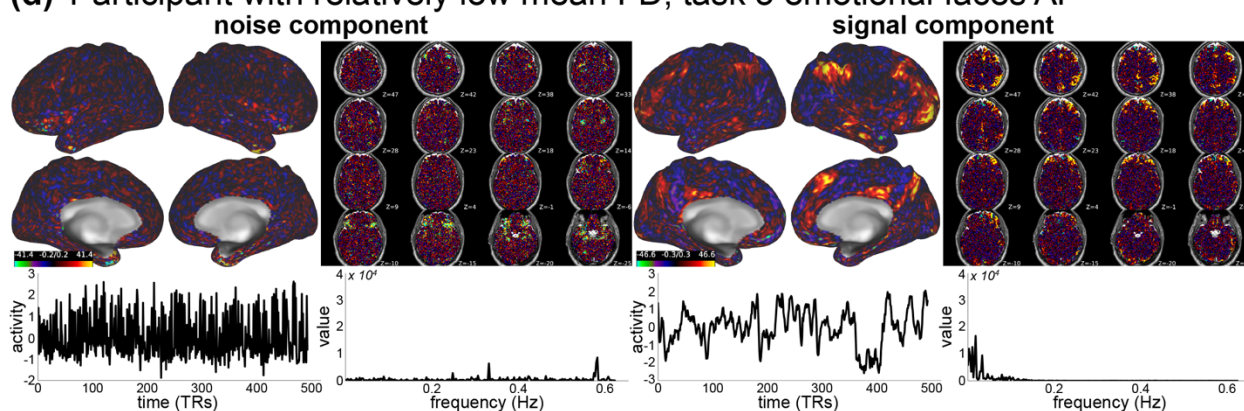

**Figure S1. Example quality assurance of ICA-FIX. (a)** Example connectome workbench scenes provided by the HCP processing step “PostFix”, which allows researchers to perform quality checks on the classification given by ICA-FIX denoising. This panel shows one example participant who exhibited relatively high FD across resting-state run 1 AP TRs. *Left panel:* example noise component; *right panel:* example signal component. In each of these panels the top left and right show montages of this component on the surface and across various axial volume slices, respectively. The bottom left is the component across the timeseries, and the bottom right is the corresponding power spectrum. **(b)** The same as panel a, but for a participant who exhibited relatively low FD across resting-state run 1 AP. **(c)** and **(d)** are the same as panels a and b, respectively, but for the Emotional Faces fMRI task. In each case, signal components show prototypical timeseries with power spectrum mainly exhibited in low frequencies, while noise components either contain “spikes” with respect to the timeseries (as in panel a, left), or exhibit waveforms with classical random “noisiness” (as in panel d, left). The noise components for panels a and c are also clearly evident on the surface via unusual banding patterns across select portions of cortex, whereas signal components appear to map onto functional systems more smoothly.

**(a) All participants**

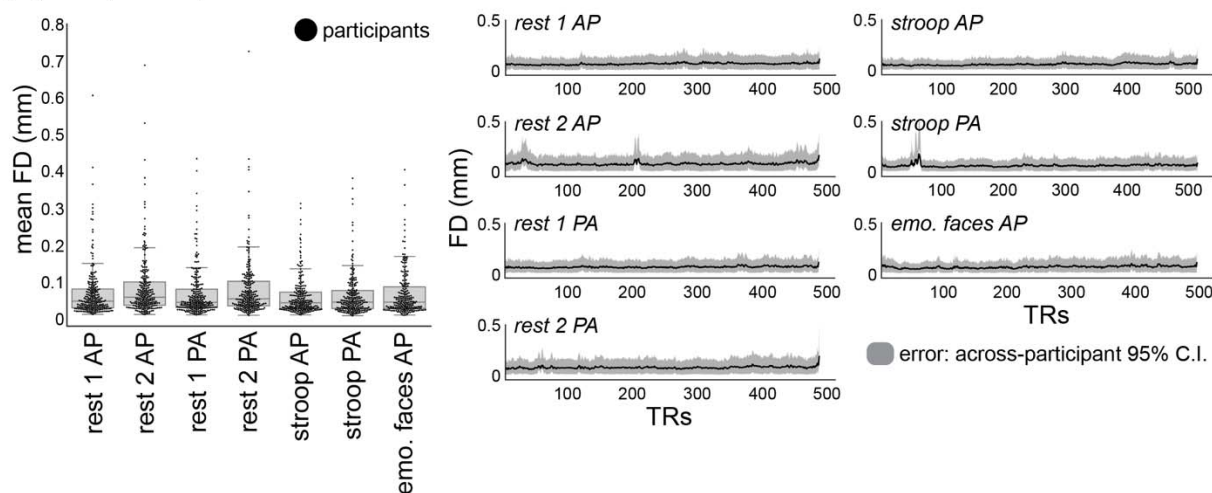

**(b) Grouped by psychiatric diagnosis**

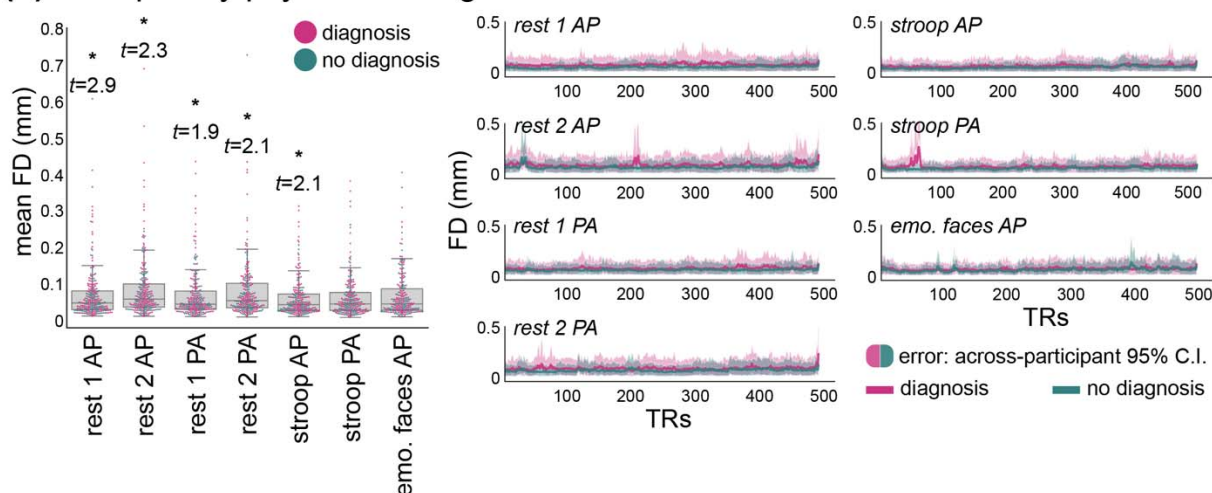

**Figure S2. Mean-filtered and down-sampled framewise displacement (FD) for each fMRI run. (a)** *Left:* boxplots of the FD (in mm) indicate across-region and across-run averages exhibited by each participant (black dots). *Right:* FD traces across the entire functional timeseries (in TRs) for each run. Black lines indicate across-participant averages; shaded gray portions indicate across-participant confidence intervals (95%). Panel a shows all TCP participants. **(b)** Same as panel a but grouping TCP participants by those with a psychiatric diagnosis (magenta) and those without a psychiatric diagnosis (turquoise). Asterisks on the left-most boxplots indicate that those with diagnoses exhibited significantly higher FD than those without diagnoses for that functional run, as given by Welch's t-test for independent samples with unequal variances. The statistics for all comparisons were as follows: (1) rest AP, run 1:  $t(223.16) = 2.89, p = 0.002$ ; (2) rest AP, run 2:  $t(227.74) = 2.32, p = 0.011$ ; (3) rest PA, run 1:  $t(236.69) = 1.92, p = 0.028$ ; (4) rest PA, run 2:  $t(230.6) = 2.05, p = 0.021$ ; (5) task 1, Stroop AP:  $t(222.65) = 2.12, p = 0.018$ ; (6) task 3, Stroop PA:  $t(143.09) = 1.47, p = 0.072$ ; (7) task 3, Emotional Faces AP:  $t(217.59) = 1.2, p = 0.116$ . While the impact of motion was well-controlled for all participants, those exhibiting the largest FD were participants with diagnoses (refer to outlier dots on the left and t-test results, as well as relatively more magenta “spikes” on right FD traces), consistent with the literature. All panels show FD of timeseries data that was denoised with ICA-FIX and had GSR applied.

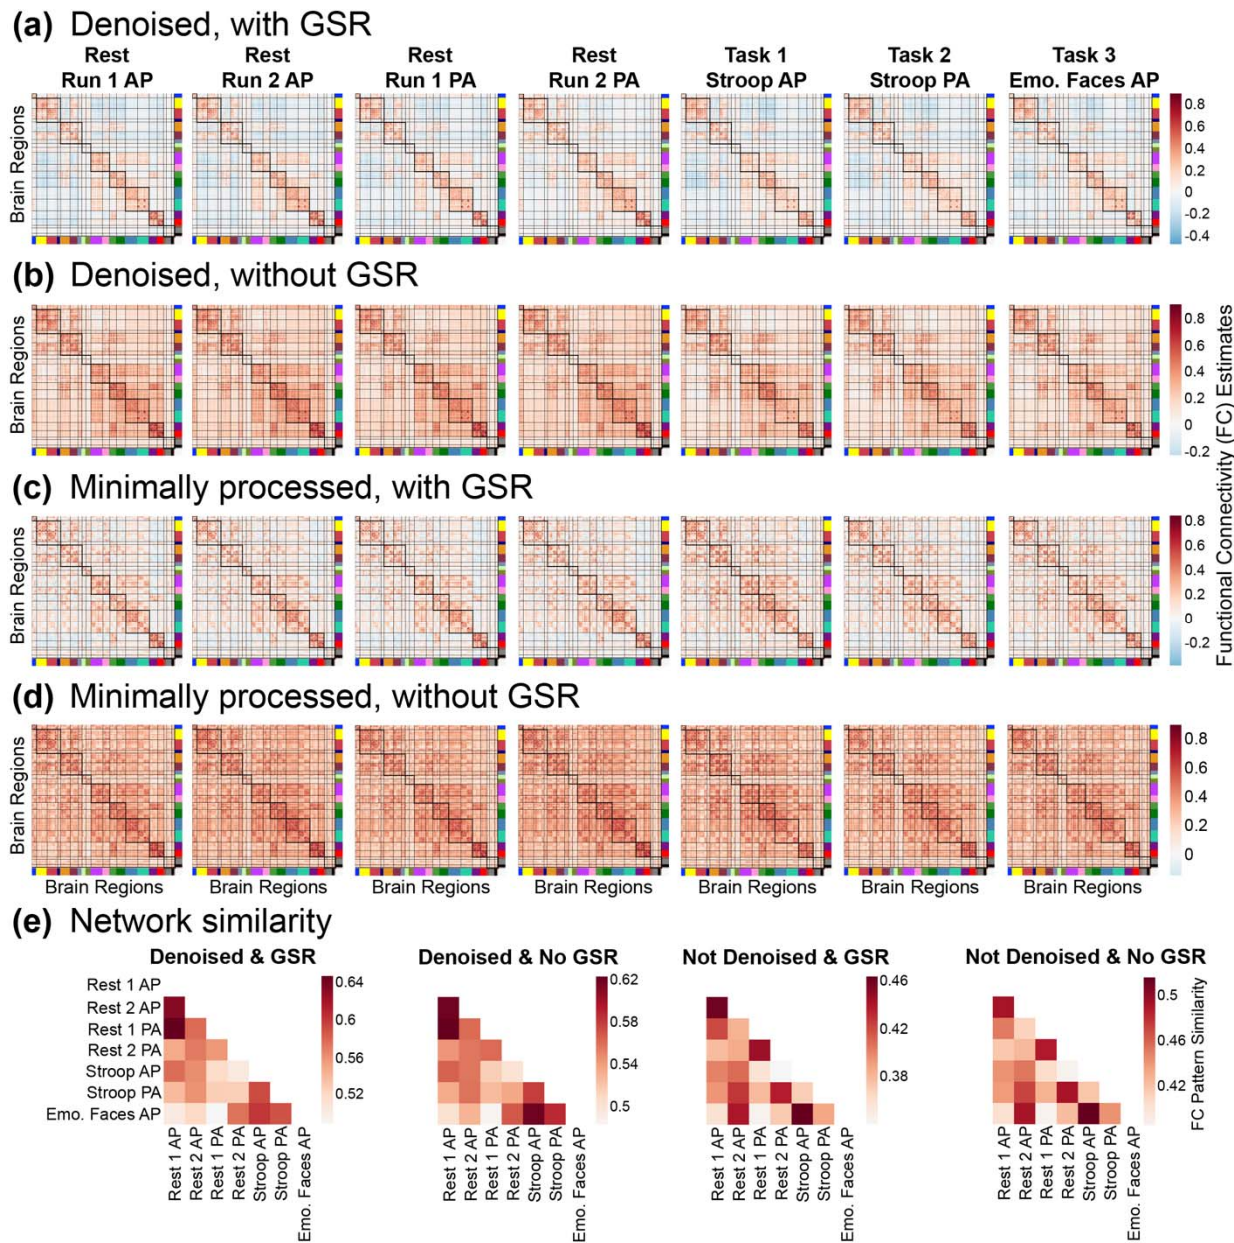

**Figure S3. Group-average functional connectivity matrices at different stages of processing. (a)**

The same connectomes shown in Fig. 5; timeseries data was denoised with ICA-FIX and GSR was applied. **(b)** Timeseries data was denoised, but no GSR was applied. Note the global consistency in network structure to panel a, but a shifted range for connectivity estimates. As shown in prior work, GSR improved the separation of within-network versus between-network connectivity patterns. **(c)** Timeseries data were minimally processed with the HCP pipelines, but denoising steps were not performed. Here, GSR was applied. **(d)** Timeseries did not have denoising nor GSR applied. Note that while the gross network structure was still apparent, the absence of denoising (panels c and d) introduced mini-clusters of connectivity patterns dispersed throughout the network; these are likely spurious. **(e)** The same network similarity (given by Mantel  $r$ ) results shown in Fig. 5, but for all four processing variants in panels a through d. The pattern of network similarity results was consistent for the approaches with denoising, with and without GSR. However, the absence of denoising (two right-most heatmaps) yielded some inconsistencies. Resting-state 2 AP exhibited increased similarity with the Emotional Faces task and

Resting-state 2 PA exhibited increased similarity with the Stroop AP task; these increases are also likely spurious. Taken together, we recommend use of functional connectivity estimates with denoising, and with or without GSR depending on the research question (i.e., panel a or b).

### 1. Determining missing data as a function of removing subjects and variables

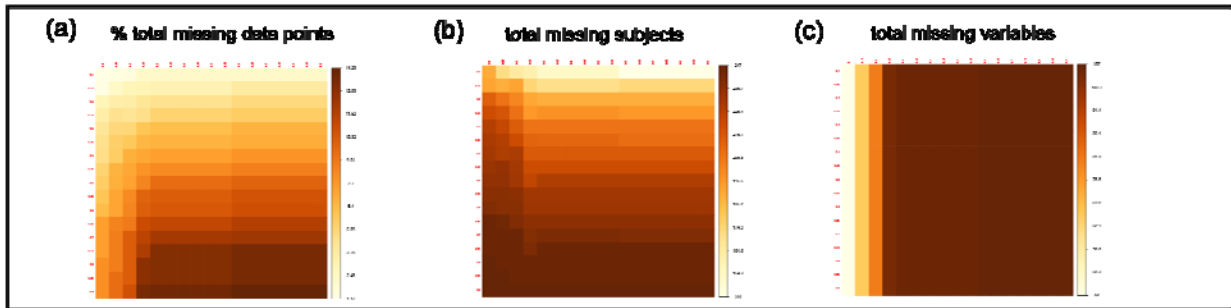

### 2. Apply thresholds to reduce observed data

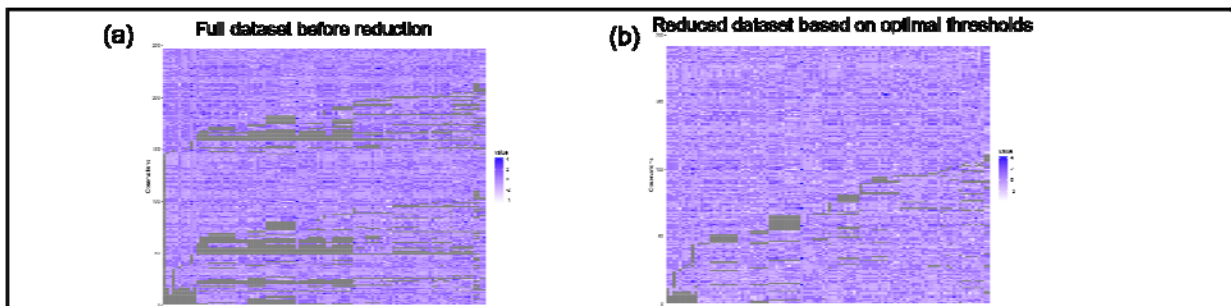

### 3. Compare the performance of multiple pipelines on simulated data

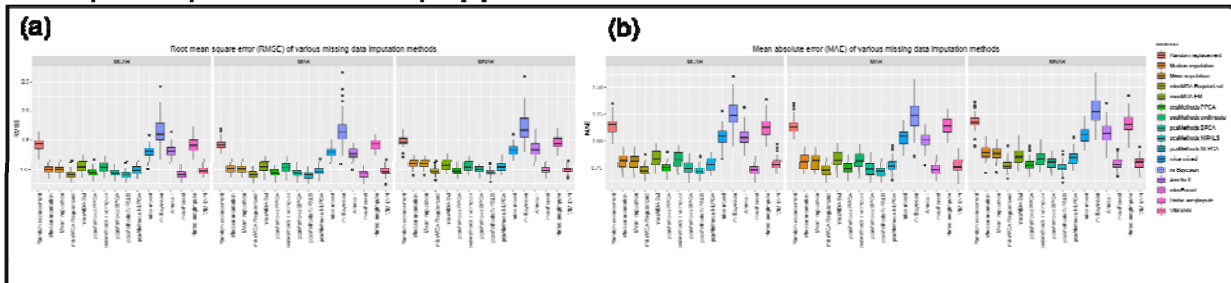

### 4. Apply and evaluate the performing pipeline on reduced observed data

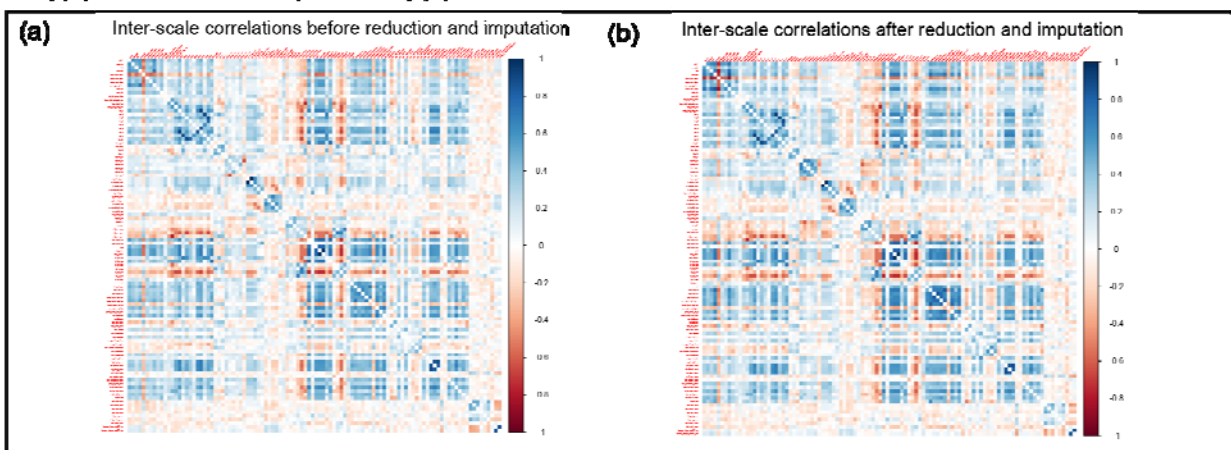

**Figure S4. Imputation pipeline for behavioral data prior to dimensionality reduction.** **1)** Optimal thresholds for removing participants and variables with excessive missing data prior to imputation were computed based on inflection points that retained the most data across total data points, participants, and variables, while reducing overall missingness. **2)** This resulted removing participants with >20% and variables with >25% missing data. This resulted in 191 participants and 104 measures entering the imputation process. **3)** Using the missCompare package, we compared the performance of 16 different imputation pipelines on 50 simulated version of the observed data under three conditions: Missing Completely At Random (MCAR), Missing At Random (MAR) and Missing Not At Random or Non-Ignorable (MNAR). **4)** The missForrest pipeline showed the best performance and was used to impute data in the reduced observed dataset. Distributions and correlations between scales were compared before and after imputation to ensure imputation quality.
