# Supplementary material for: The Transdiagnostic Connectome Project: a richly phenotyped open dataset for advancing the study of brain-behavior relationships in psychiatry
Source: bioRxiv or medRxiv preprint supplement (doi:10.1101/2024.06.18.24309054), 2024-06-21
Supplement: Supplementary file [file media-1.zip]

|                          |
|--------------------------|
| <b>Table of contents</b> |
|--------------------------|

|            |
|------------|
| \\Research |
|------------|

|               |
|---------------|
| Investigators |
|---------------|

|       |
|-------|
| Baker |
|-------|

|                                         |
|-----------------------------------------|
| Holmes_Yale_McLean_Dec2019_NOEXPIRATION |
|-----------------------------------------|

|                                                                                                                                                                                                                                                                                                                                                                                                                                                                                                                                                                                                                                                                                                                                        |
|----------------------------------------------------------------------------------------------------------------------------------------------------------------------------------------------------------------------------------------------------------------------------------------------------------------------------------------------------------------------------------------------------------------------------------------------------------------------------------------------------------------------------------------------------------------------------------------------------------------------------------------------------------------------------------------------------------------------------------------|
| <a href="#">Localizer</a><br><a href="#">AAHScout</a><br><a href="#">Localizer_aligned</a><br><a href="#">T1_vNav_setter</a><br><a href="#">T1_MEMPRAGE_GSP_vNavTrk</a><br><a href="#">T2_vNav_setter</a><br><a href="#">T2_SPACE_GSP_vNavTrk</a><br><a href="#">SpinEchoFieldMap_AP</a><br><a href="#">SpinEchoFieldMap_PA</a><br><a href="#">rfMRI_REST_AP</a><br><a href="#">rfMRI_REST_PA</a><br><a href="#">Stroop_BI1_AP</a><br><a href="#">Stroop_BI2_PA</a><br><a href="#">Hammer_BI1_AP</a><br><a href="#">rfMRI_REST_AP</a><br><a href="#">rfMRI_REST_PA</a><br><a href="#">T1_MEMPRAGE_64ch</a><br><a href="#">t2_tse_dark-fluid_tra</a><br><a href="#">pd+t2_tse_tra</a><br><a href="#">resolve_4scan_trace_tra_p2_192</a> |
|----------------------------------------------------------------------------------------------------------------------------------------------------------------------------------------------------------------------------------------------------------------------------------------------------------------------------------------------------------------------------------------------------------------------------------------------------------------------------------------------------------------------------------------------------------------------------------------------------------------------------------------------------------------------------------------------------------------------------------------|

\\Research\\Investigators\\Baker\\Holmes\_Yale\_McLean\_Dec2019\_NOEXPIRATION\\Localizer

TA: 9.2 s PM: REF Voxel size: 1.2×1.2×5.0 mmPAT: Off Rel. SNR: 1.00 : fl

**Properties**

|                                               |                    |
|-----------------------------------------------|--------------------|
| Prio recon                                    | On                 |
| Load images to viewer                         | Off                |
| Inline movie                                  | Off                |
| Auto store images                             | On                 |
| Load images to stamp segments                 | On                 |
| Load images to graphic segments               | On                 |
| Auto open inline display                      | Off                |
| Auto close inline display                     | Off                |
| Start measurement without further preparation | On                 |
| Wait for user to start                        | On                 |
| Start measurements                            | Single measurement |

**Routine**

|                    |                                         |
|--------------------|-----------------------------------------|
| Slice group        | 1                                       |
| Slices             | 1                                       |
| Dist. factor       | 20 %                                    |
| Position           | L0.0 A20.0 H0.0 mm                      |
| Orientation        | Transversal                             |
| Phase enc. dir.    | A >> P                                  |
| Slice group        | 2                                       |
| Slices             | 1                                       |
| Dist. factor       | 20 %                                    |
| Position           | L0.0 A20.0 H0.0 mm                      |
| Orientation        | Sagittal                                |
| Phase enc. dir.    | A >> P                                  |
| Slice group        | 3                                       |
| Slices             | 1                                       |
| Dist. factor       | 20 %                                    |
| Position           | L0.0 A20.0 H0.0 mm                      |
| Orientation        | Coronal                                 |
| Phase enc. dir.    | R >> L                                  |
| AutoAlign          | ---                                     |
| Phase oversampling | 0 %                                     |
| FoV read           | 300 mm                                  |
| FoV phase          | 100.0 %                                 |
| Slice thickness    | 5.0 mm                                  |
| TR                 | 40.0 ms                                 |
| TE                 | 3.00 ms                                 |
| Averages           | 1                                       |
| Concatenations     | 1                                       |
| Filter             | Prescan Normalize,<br>Elliptical filter |
| Coil elements      | HC1-7;NC1,2                             |

**Contrast - Common**

|                   |         |
|-------------------|---------|
| TR                | 40.0 ms |
| TE                | 3.00 ms |
| MTC               | Off     |
| Magn. preparation | None    |
| Flip angle        | 15 deg  |
| Fat suppr.        | None    |
| Water suppr.      | None    |
| SWI               | Off     |

**Contrast - Dynamic**

|                 |            |
|-----------------|------------|
| Averages        | 1          |
| Averaging mode  | Short term |
| Reconstruction  | Magnitude  |
| Measurements    | 1          |
| Multiple series | Off        |

**Resolution - Common**

|                       |         |
|-----------------------|---------|
| FoV read              | 300 mm  |
| FoV phase             | 100.0 % |
| Slice thickness       | 5.0 mm  |
| Base resolution       | 256     |
| Phase resolution      | 75 %    |
| Phase partial Fourier | Off     |
| Interpolation         | Off     |

**Resolution - iPAT**

|          |      |
|----------|------|
| PAT mode | None |
|----------|------|

**Resolution - Filter Image**

|                   |     |
|-------------------|-----|
| Image Filter      | Off |
| Distortion Corr.  | Off |
| Prescan Normalize | On  |
| Unfiltered images | Off |
| Normalize         | Off |
| B1 filter         | Off |

**Resolution - Filter Rawdata**

|                   |     |
|-------------------|-----|
| Raw filter        | Off |
| Elliptical filter | On  |

**Geometry - Common**

|                  |                    |
|------------------|--------------------|
| Slice group      | 1                  |
| Slices           | 1                  |
| Dist. factor     | 20 %               |
| Position         | L0.0 A20.0 H0.0 mm |
| Orientation      | Transversal        |
| Phase enc. dir.  | A >> P             |
| Slice group      | 2                  |
| Slices           | 1                  |
| Dist. factor     | 20 %               |
| Position         | L0.0 A20.0 H0.0 mm |
| Orientation      | Sagittal           |
| Phase enc. dir.  | A >> P             |
| Slice group      | 3                  |
| Slices           | 1                  |
| Dist. factor     | 20 %               |
| Position         | L0.0 A20.0 H0.0 mm |
| Orientation      | Coronal            |
| Phase enc. dir.  | R >> L             |
| FoV read         | 300 mm             |
| FoV phase        | 100.0 %            |
| Slice thickness  | 5.0 mm             |
| TR               | 40.0 ms            |
| Multi-slice mode | Interleaved        |
| Series           | Interleaved        |
| Concatenations   | 1                  |

**Geometry - AutoAlign**

|                 |                    |
|-----------------|--------------------|
| Slice group     | 1                  |
| Position        | L0.0 A20.0 H0.0 mm |
| Orientation     | Transversal        |
| Phase enc. dir. | A >> P             |
| Slice group     | 2                  |
| Position        | L0.0 A20.0 H0.0 mm |
| Orientation     | Sagittal           |
| Phase enc. dir. | A >> P             |
| Slice group     | 3                  |

**Geometry - AutoAlign**

|                     |                    |
|---------------------|--------------------|
| Position            | L0.0 A20.0 H0.0 mm |
| Orientation         | Coronal            |
| Phase enc. dir.     | R >> L             |
| AutoAlign           | ---                |
| Initial Position    | L0.0 A20.0 H0.0    |
| L                   | 0.0 mm             |
| A                   | 20.0 mm            |
| H                   | 0.0 mm             |
| Initial Rotation    | 0.00 deg           |
| Initial Orientation | Transversal        |

**Geometry - Saturation**

|                 |          |
|-----------------|----------|
| Saturation mode | Standard |
| Fat suppr.      | None     |
| Water suppr.    | None     |
| Special sat.    | None     |

**System - Miscellaneous**

|                     |                |
|---------------------|----------------|
| Positioning mode    | REF            |
| Table position      | H              |
| Table position      | 0 mm           |
| MSMA                | S - C - T      |
| Sagittal            | R >> L         |
| Coronal             | A >> P         |
| Transversal         | F >> H         |
| Coil Combine Mode   | Sum of Squares |
| Save uncombined     | Off            |
| Matrix Optimization | Off            |
| AutoAlign           | ---            |
| Coil Select Mode    | Off - All      |

**System - Adjustments**

|                          |          |
|--------------------------|----------|
| B0 Shim mode             | Tune up  |
| B1 Shim mode             | TrueForm |
| Adjust with body coil    | On       |
| Confirm freq. adjustment | Off      |
| Assume Dominant Fat      | Off      |
| Assume Silicone          | Off      |
| Adjustment Tolerance     | Auto     |

**System - Adjust Volume**

|             |             |
|-------------|-------------|
| Position    | Isocenter   |
| Orientation | Transversal |
| Rotation    | 0.00 deg    |
| A >> P      | 263 mm      |
| R >> L      | 350 mm      |
| F >> H      | 350 mm      |
| Reset       | Off         |

**System - pTx Volumes**

|              |            |
|--------------|------------|
| B1 Shim mode | TrueForm   |
| Excitation   | Slice-sel. |

**System - Tx/Rx**

|                     |                |
|---------------------|----------------|
| Frequency 1H        | 123.261582 MHz |
| Correction factor   | 1              |
| Gain                | High           |
| Img. Scale Cor.     | 1.000          |
| Reset               | Off            |
| ? Ref. amplitude 1H | 0.000 V        |

**Physio - Signal1**

|                 |      |
|-----------------|------|
| 1st Signal/Mode | None |
|-----------------|------|

**Physio - Signal1**

|                |         |
|----------------|---------|
| TR             | 40.0 ms |
| Concatenations | 1       |
| Segments       | 1       |

**Physio - Cardiac**

|                   |         |
|-------------------|---------|
| Magn. preparation | None    |
| Fat suppr.        | None    |
| Dark blood        | Off     |
| FoV read          | 300 mm  |
| FoV phase         | 100.0 % |
| Phase resolution  | 75 %    |

**Physio - PACE**

|                |     |
|----------------|-----|
| Resp. control  | Off |
| Concatenations | 1   |

**Inline - Common**

|                      |     |
|----------------------|-----|
| Subtract             | Off |
| Measurements         | 1   |
| StdDev               | Off |
| Liver registration   | Off |
| Save original images | On  |

**Inline - MIP**

|                      |     |
|----------------------|-----|
| MIP-Sag              | Off |
| MIP-Cor              | Off |
| MIP-Tra              | Off |
| MIP-Time             | Off |
| Save original images | On  |

**Inline - Soft Tissue**

|              |     |
|--------------|-----|
| Wash - In    | Off |
| Wash - Out   | Off |
| TTP          | Off |
| PEI          | Off |
| MIP - time   | Off |
| Measurements | 1   |

**Inline - Composing**

|                  |     |
|------------------|-----|
| Distortion Corr. | Off |
|------------------|-----|

**Sequence - Part 1**

|                     |             |
|---------------------|-------------|
| Introduction        | On          |
| Dimension           | 2D          |
| Phase stabilisation | Off         |
| Asymmetric echo     | Allowed     |
| Contrasts           | 1           |
| Flow comp.          | No          |
| Multi-slice mode    | Interleaved |
| Bandwidth           | 260 Hz/Px   |

**Sequence - Part 2**

|                          |            |
|--------------------------|------------|
| Segments                 | 1          |
| Acoustic noise reduction | None       |
| RF pulse type            | Normal     |
| Gradient mode            | Fast       |
| Excitation               | Slice-sel. |
| RF spoiling              | On         |

**Sequence - Assistant**

|               |     |
|---------------|-----|
| Mode          | Off |
| Allowed delay | 0 s |

\\Research\\Investigators\\Baker\\Holmes\_Yale\_McLean\_Dec2019\_NOEXPIRATION\\AAHScout

TA: 0:14 PM: REF Voxel size: 1.6×1.6×1.6 mmPAT: 3 Rel. SNR: 1.00 : fl

**Properties**

|                                               |                    |
|-----------------------------------------------|--------------------|
| Prio recon                                    | On                 |
| Load images to viewer                         | On                 |
| Inline movie                                  | Off                |
| Auto store images                             | On                 |
| Load images to stamp segments                 | Off                |
| Load images to graphic segments               | Off                |
| Auto open inline display                      | Off                |
| Auto close inline display                     | Off                |
| Start measurement without further preparation | On                 |
| Wait for user to start                        | Off                |
| Start measurements                            | Single measurement |

**Routine**

|                    |                    |
|--------------------|--------------------|
| Slab group         | 1                  |
| Slabs              | 1                  |
| Dist. factor       | 20 %               |
| Position           | L0.0 A20.0 H0.0 mm |
| Orientation        | Sagittal           |
| Phase enc. dir.    | A >> P             |
| Phase oversampling | 0 %                |
| Slice oversampling | 0.0 %              |
| Slices per slab    | 128                |
| FoV read           | 260 mm             |
| FoV phase          | 100.0 %            |
| Slice thickness    | 1.6 mm             |
| TR                 | 3.15 ms            |
| TE                 | 1.37 ms            |
| Averages           | 1                  |
| Concatenations     | 1                  |
| Filter             | Prescan Normalize  |
| Coil elements      | HC1-7;NC1,2        |

**Contrast - Common**

|            |         |
|------------|---------|
| TR         | 3.15 ms |
| TE         | 1.37 ms |
| Flip angle | 8 deg   |

**Contrast - Dynamic**

|                |            |
|----------------|------------|
| Averages       | 1          |
| Averaging mode | Short term |
| Reconstruction | Magnitude  |
| Measurements   | 1          |

**Resolution - Common**

|                       |           |
|-----------------------|-----------|
| FoV read              | 260 mm    |
| FoV phase             | 100.0 %   |
| Slice thickness       | 1.6 mm    |
| Base resolution       | 160       |
| Phase resolution      | 100 %     |
| Slice resolution      | 69 %      |
| Phase partial Fourier | 6/8       |
| Slice partial Fourier | 6/8       |
| Trajectory            | Cartesian |

**Resolution - iPAT**

|                  |        |
|------------------|--------|
| PAT mode         | GRAPPA |
| Accel. factor PE | 3      |
| Ref. lines PE    | 24     |
| Accel. factor 3D | 1      |

**Resolution - iPAT**

|                     |            |
|---------------------|------------|
| Reference scan mode | Integrated |
|---------------------|------------|

**Resolution - Filter Image**

|                   |     |
|-------------------|-----|
| Image Filter      | Off |
| Distortion Corr.  | Off |
| Prescan Normalize | On  |
| Unfiltered images | Off |
| Normalize         | Off |
| B1 filter         | Off |

**Resolution - Filter Rawdata**

|                   |     |
|-------------------|-----|
| Raw filter        | Off |
| Elliptical filter | Off |

**Geometry - Common**

|                    |                    |
|--------------------|--------------------|
| Slab group         | 1                  |
| Slabs              | 1                  |
| Dist. factor       | 20 %               |
| Position           | L0.0 A20.0 H0.0 mm |
| Orientation        | Sagittal           |
| Phase enc. dir.    | A >> P             |
| Slice oversampling | 0.0 %              |
| Slices per slab    | 128                |
| FoV read           | 260 mm             |
| FoV phase          | 100.0 %            |
| Slice thickness    | 1.6 mm             |
| TR                 | 3.15 ms            |
| Multi-slice mode   | Sequential         |
| Series             | Ascending          |
| Concatenations     | 1                  |

**Geometry - AutoAlign**

|                     |                    |
|---------------------|--------------------|
| Slab group          | 1                  |
| Position            | L0.0 A20.0 H0.0 mm |
| Orientation         | Sagittal           |
| Phase enc. dir.     | A >> P             |
| Initial Position    | Isocenter          |
| L                   | 0.0 mm             |
| P                   | 0.0 mm             |
| H                   | 0.0 mm             |
| Initial Rotation    | 0.00 deg           |
| Initial Orientation | Transversal        |

**System - Miscellaneous**

|                     |                  |
|---------------------|------------------|
| Positioning mode    | REF              |
| Table position      | H                |
| Table position      | 0 mm             |
| MSMA                | S - C - T        |
| Sagittal            | R >> L           |
| Coronal             | A >> P           |
| Transversal         | F >> H           |
| Coil Combine Mode   | Adaptive Combine |
| Save uncombined     | Off              |
| Matrix Optimization | Off              |
| Coil Select Mode    | Off - All        |

**System - Adjustments**

|                       |          |
|-----------------------|----------|
| B0 Shim mode          | Tune up  |
| B1 Shim mode          | TrueForm |
| Adjust with body coil | On       |

**System - Adjustments**

|                          |      |
|--------------------------|------|
| Confirm freq. adjustment | Off  |
| Assume Dominant Fat      | Off  |
| Assume Silicone          | Off  |
| Adjustment Tolerance     | Auto |

**Sequence - Part 2**

|             |    |
|-------------|----|
| RF spoiling | On |
|-------------|----|

**Sequence - Assistant**

|      |     |
|------|-----|
| Mode | Off |
|------|-----|

**System - Adjust Volume**

|             |             |
|-------------|-------------|
| Position    | Isocenter   |
| Orientation | Transversal |
| Rotation    | 0.00 deg    |
| A >> P      | 263 mm      |
| R >> L      | 350 mm      |
| F >> H      | 350 mm      |
| Reset       | Off         |

**System - pTx Volumes**

|              |          |
|--------------|----------|
| B1 Shim mode | TrueForm |
| Excitation   | Non-sel. |

**System - Tx/Rx**

|                     |                |
|---------------------|----------------|
| Frequency 1H        | 123.261582 MHz |
| Correction factor   | 1              |
| Gain                | Low            |
| Img. Scale Cor.     | 1.000          |
| Reset               | Off            |
| ? Ref. amplitude 1H | 0.000 V        |

**Physio - PACE**

|                |     |
|----------------|-----|
| Resp. control  | Off |
| Concatenations | 1   |

**Inline - Common**

|                |       |
|----------------|-------|
| Flip angle     | 8 deg |
| Measurements   | 1     |
| Time to center | 6.2 s |

**Inline - Inline**

|                      |     |
|----------------------|-----|
| Subtract             | Off |
| Measurements         | 1   |
| StdDev               | Off |
| Save original images | On  |

**Inline - MIP**

|                      |     |
|----------------------|-----|
| MIP-Sag              | Off |
| MIP-Cor              | Off |
| MIP-Tra              | Off |
| MIP-Time             | Off |
| Save original images | On  |

**Inline - Composing**

|                  |     |
|------------------|-----|
| Distortion Corr. | Off |
|------------------|-----|

**Sequence - Part 1**

|                  |            |
|------------------|------------|
| Introduction     | On         |
| Dimension        | 3D         |
| Asymmetric echo  | Weak       |
| Contrasts        | 1          |
| Multi-slice mode | Sequential |
| Bandwidth        | 540 Hz/Px  |

**Sequence - Part 2**

|               |          |
|---------------|----------|
| RF pulse type | Fast     |
| Gradient mode | Normal   |
| Excitation    | Non-sel. |

\\Research\\Investigators\\Baker\\Holmes\_Yale\_McLean\_Dec2019\_NOEXPIRATION\\Localizer\_aligned

TA: 0:21 PM: REF Voxel size: 1.2×1.2×5.0 mmPAT: Off Rel. SNR: 1.00 : fl

**Properties**

|                                               |                    |
|-----------------------------------------------|--------------------|
| Prio recon                                    | On                 |
| Load images to viewer                         | On                 |
| Inline movie                                  | Off                |
| Auto store images                             | On                 |
| Load images to stamp segments                 | On                 |
| Load images to graphic segments               | On                 |
| Auto open inline display                      | Off                |
| Auto close inline display                     | Off                |
| Start measurement without further preparation | On                 |
| Wait for user to start                        | Off                |
| Start measurements                            | Single measurement |

**Routine**

|                    |                                      |
|--------------------|--------------------------------------|
| Slice group        | 1                                    |
| Slices             | 1                                    |
| Dist. factor       | 20 %                                 |
| Position           | Isocenter                            |
| Orientation        | Transversal                          |
| Phase enc. dir.    | A >> P                               |
| Slice group        | 2                                    |
| Slices             | 7                                    |
| Dist. factor       | 200 %                                |
| Position           | Isocenter                            |
| Orientation        | Sagittal                             |
| Phase enc. dir.    | A >> P                               |
| Slice group        | 3                                    |
| Slices             | 1                                    |
| Dist. factor       | 20 %                                 |
| Position           | Isocenter                            |
| Orientation        | Coronal                              |
| Phase enc. dir.    | R >> L                               |
| AutoAlign          | Head > Brain                         |
| Phase oversampling | 0 %                                  |
| FoV read           | 300 mm                               |
| FoV phase          | 100.0 %                              |
| Slice thickness    | 5.0 mm                               |
| TR                 | 104.0 ms                             |
| TE                 | 3.00 ms                              |
| Averages           | 1                                    |
| Concatenations     | 1                                    |
| Filter             | Prescan Normalize, Elliptical filter |
| Coil elements      | HC1-7;NC1,2                          |

**Contrast - Common**

|                   |          |
|-------------------|----------|
| TR                | 104.0 ms |
| TE                | 3.00 ms  |
| MTC               | Off      |
| Magn. preparation | None     |
| Flip angle        | 15 deg   |
| Fat suppr.        | None     |
| Water suppr.      | None     |
| SWI               | Off      |

**Contrast - Dynamic**

|                 |            |
|-----------------|------------|
| Averages        | 1          |
| Averaging mode  | Short term |
| Reconstruction  | Magnitude  |
| Measurements    | 1          |
| Multiple series | Off        |

**Resolution - Common**

|                       |         |
|-----------------------|---------|
| FoV read              | 300 mm  |
| FoV phase             | 100.0 % |
| Slice thickness       | 5.0 mm  |
| Base resolution       | 256     |
| Phase resolution      | 75 %    |
| Phase partial Fourier | Off     |
| Interpolation         | Off     |

**Resolution - iPAT**

|          |      |
|----------|------|
| PAT mode | None |
|----------|------|

**Resolution - Filter Image**

|                   |     |
|-------------------|-----|
| Image Filter      | Off |
| Distortion Corr.  | Off |
| Prescan Normalize | On  |
| Unfiltered images | Off |
| Normalize         | Off |
| B1 filter         | Off |

**Resolution - Filter Rawdata**

|                   |     |
|-------------------|-----|
| Raw filter        | Off |
| Elliptical filter | On  |

**Geometry - Common**

|                  |             |
|------------------|-------------|
| Slice group      | 1           |
| Slices           | 1           |
| Dist. factor     | 20 %        |
| Position         | Isocenter   |
| Orientation      | Transversal |
| Phase enc. dir.  | A >> P      |
| Slice group      | 2           |
| Slices           | 7           |
| Dist. factor     | 200 %       |
| Position         | Isocenter   |
| Orientation      | Sagittal    |
| Phase enc. dir.  | A >> P      |
| Slice group      | 3           |
| Slices           | 1           |
| Dist. factor     | 20 %        |
| Position         | Isocenter   |
| Orientation      | Coronal     |
| Phase enc. dir.  | R >> L      |
| FoV read         | 300 mm      |
| FoV phase        | 100.0 %     |
| Slice thickness  | 5.0 mm      |
| TR               | 104.0 ms    |
| Multi-slice mode | Interleaved |
| Series           | Interleaved |
| Concatenations   | 1           |

**Geometry - AutoAlign**

|                 |             |
|-----------------|-------------|
| Slice group     | 1           |
| Position        | Isocenter   |
| Orientation     | Transversal |
| Phase enc. dir. | A >> P      |
| Slice group     | 2           |
| Position        | Isocenter   |
| Orientation     | Sagittal    |
| Phase enc. dir. | A >> P      |
| Slice group     | 3           |

**Geometry - AutoAlign**

|                     |              |
|---------------------|--------------|
| Position            | Isocenter    |
| Orientation         | Coronal      |
| Phase enc. dir.     | R >> L       |
| AutoAlign           | Head > Brain |
| Initial Position    | Isocenter    |
| L                   | 0.0 mm       |
| P                   | 0.0 mm       |
| H                   | 0.0 mm       |
| Initial Rotation    | 0.00 deg     |
| Initial Orientation | Transversal  |

**Geometry - Saturation**

|                 |          |
|-----------------|----------|
| Saturation mode | Standard |
| Fat suppr.      | None     |
| Water suppr.    | None     |
| Special sat.    | None     |

**System - Miscellaneous**

|                     |                |
|---------------------|----------------|
| Positioning mode    | REF            |
| Table position      | H              |
| Table position      | 0 mm           |
| MSMA                | S - C - T      |
| Sagittal            | R >> L         |
| Coronal             | A >> P         |
| Transversal         | F >> H         |
| Coil Combine Mode   | Sum of Squares |
| Save uncombined     | Off            |
| Matrix Optimization | Off            |
| AutoAlign           | Head > Brain   |
| Coil Select Mode    | Off - All      |

**System - Adjustments**

|                          |          |
|--------------------------|----------|
| B0 Shim mode             | Tune up  |
| B1 Shim mode             | TrueForm |
| Adjust with body coil    | On       |
| Confirm freq. adjustment | Off      |
| Assume Dominant Fat      | Off      |
| Assume Silicone          | Off      |
| Adjustment Tolerance     | Auto     |

**System - Adjust Volume**

|             |             |
|-------------|-------------|
| Position    | Isocenter   |
| Orientation | Transversal |
| Rotation    | 0.00 deg    |
| A >> P      | 263 mm      |
| R >> L      | 350 mm      |
| F >> H      | 350 mm      |
| Reset       | Off         |

**System - pTx Volumes**

|              |            |
|--------------|------------|
| B1 Shim mode | TrueForm   |
| Excitation   | Slice-sel. |

**System - Tx/Rx**

|                     |                |
|---------------------|----------------|
| Frequency 1H        | 123.261582 MHz |
| Correction factor   | 1              |
| Gain                | High           |
| Img. Scale Cor.     | 1.000          |
| Reset               | Off            |
| ? Ref. amplitude 1H | 0.000 V        |

**Physio - Signal1**

|                 |      |
|-----------------|------|
| 1st Signal/Mode | None |
|-----------------|------|

**Physio - Signal1**

|                |          |
|----------------|----------|
| TR             | 104.0 ms |
| Concatenations | 1        |
| Segments       | 1        |

**Physio - Cardiac**

|                   |         |
|-------------------|---------|
| Magn. preparation | None    |
| Fat suppr.        | None    |
| Dark blood        | Off     |
| FoV read          | 300 mm  |
| FoV phase         | 100.0 % |
| Phase resolution  | 75 %    |

**Physio - PACE**

|                |     |
|----------------|-----|
| Resp. control  | Off |
| Concatenations | 1   |

**Inline - Common**

|                      |     |
|----------------------|-----|
| Subtract             | Off |
| Measurements         | 1   |
| StdDev               | Off |
| Liver registration   | Off |
| Save original images | On  |

**Inline - MIP**

|                      |     |
|----------------------|-----|
| MIP-Sag              | Off |
| MIP-Cor              | Off |
| MIP-Tra              | Off |
| MIP-Time             | Off |
| Save original images | On  |

**Inline - Soft Tissue**

|              |     |
|--------------|-----|
| Wash - In    | Off |
| Wash - Out   | Off |
| TTP          | Off |
| PEI          | Off |
| MIP - time   | Off |
| Measurements | 1   |

**Inline - Composing**

|                  |     |
|------------------|-----|
| Distortion Corr. | Off |
|------------------|-----|

**Sequence - Part 1**

|                     |             |
|---------------------|-------------|
| Introduction        | On          |
| Dimension           | 2D          |
| Phase stabilisation | Off         |
| Asymmetric echo     | Allowed     |
| Contrasts           | 1           |
| Flow comp.          | No          |
| Multi-slice mode    | Interleaved |
| Bandwidth           | 260 Hz/Px   |

**Sequence - Part 2**

|                          |            |
|--------------------------|------------|
| Segments                 | 1          |
| Acoustic noise reduction | None       |
| RF pulse type            | Normal     |
| Gradient mode            | Fast       |
| Excitation               | Slice-sel. |
| RF spoiling              | On         |

**Sequence - Assistant**

|               |     |
|---------------|-----|
| Mode          | Off |
| Allowed delay | 0 s |

\\Research\\Investigators\\Baker\\Holmes\_Yale\_McLean\_Dec2019\_NOEXPIRATION\\T1\_vNav\_setter

TA: 0.3 s PM: FIX Voxel size: 8.0×8.0×8.0 mmRel. SNR: 1.00 : ABCD

**Properties**

|                                               |                    |
|-----------------------------------------------|--------------------|
| Prio recon                                    | Off                |
| Load images to viewer                         | On                 |
| Inline movie                                  | Off                |
| Auto store images                             | On                 |
| Load images to stamp segments                 | Off                |
| Load images to graphic segments               | Off                |
| Auto open inline display                      | Off                |
| Auto close inline display                     | Off                |
| Start measurement without further preparation | On                 |
| Wait for user to start                        | On                 |
| Start measurements                            | Single measurement |

**Routine**

|                    |                    |
|--------------------|--------------------|
| Slab group         | 1                  |
| Slabs              | 1                  |
| Dist. factor       | 50 %               |
| Position           | L0.0 P0.0 H50.0 mm |
| Orientation        | Sagittal           |
| Phase enc. dir.    | A >> P             |
| AutoAlign          | Head > Brain       |
| Phase oversampling | 0 %                |
| Slice oversampling | 0.0 %              |
| Slices per slab    | 32                 |
| FoV read           | 256 mm             |
| FoV phase          | 100.0 %            |
| Slice thickness    | 8.00 mm            |
| TR                 | 11.0 ms            |
| TE                 | 4.8 ms             |
| Averages           | 1                  |
| Concatenations     | 1                  |
| Filter             | None               |
| Coil elements      | BC                 |

**Contrast - Common**

|            |         |
|------------|---------|
| TR         | 11.0 ms |
| TE         | 4.8 ms  |
| MTC        | Off     |
| Flip angle | 2 deg   |
| Fat suppr. | None    |

**Contrast - Dynamic**

|                 |                  |
|-----------------|------------------|
| Averages        | 1                |
| Averaging mode  | Long term        |
| Reconstruction  | Magnitude        |
| Measurements    | 1                |
| Multiple series | Each measurement |

**Resolution - Common**

|                       |         |
|-----------------------|---------|
| FoV read              | 256 mm  |
| FoV phase             | 100.0 % |
| Slice thickness       | 8.00 mm |
| Base resolution       | 32      |
| Phase resolution      | 100 %   |
| Slice resolution      | 100 %   |
| Phase partial Fourier | Off     |
| Slice partial Fourier | 6/8     |
| Interpolation         | Off     |

**Resolution - Filter Image**

|                   |     |
|-------------------|-----|
| Distortion Corr.  | Off |
| Prescan Normalize | Off |

**Resolution - Filter Rawdata**

|                   |     |
|-------------------|-----|
| Raw filter        | Off |
| Elliptical filter | Off |
| Hamming           | Off |

**Geometry - Common**

|                    |                    |
|--------------------|--------------------|
| Slab group         | 1                  |
| Slabs              | 1                  |
| Dist. factor       | 50 %               |
| Position           | L0.0 P0.0 H50.0 mm |
| Orientation        | Sagittal           |
| Phase enc. dir.    | A >> P             |
| Slice oversampling | 0.0 %              |
| Slices per slab    | 32                 |
| FoV read           | 256 mm             |
| FoV phase          | 100.0 %            |
| Slice thickness    | 8.00 mm            |
| TR                 | 11.0 ms            |
| Multi-slice mode   | Interleaved        |
| Series             | Interleaved        |
| Concatenations     | 1                  |

**Geometry - AutoAlign**

|                     |                    |
|---------------------|--------------------|
| Slab group          | 1                  |
| Position            | L0.0 P0.0 H50.0 mm |
| Orientation         | Sagittal           |
| Phase enc. dir.     | A >> P             |
| AutoAlign           | Head > Brain       |
| Initial Position    | L0.0 P0.0 H50.0    |
| R                   | 0.0 mm             |
| A                   | 0.0 mm             |
| H                   | 50.0 mm            |
| Initial Rotation    | 0.00 deg           |
| Initial Orientation | Sagittal           |

**Geometry - Saturation**

|              |      |
|--------------|------|
| Fat suppr.   | None |
| Special sat. | None |

**System - Miscellaneous**

|                     |                |
|---------------------|----------------|
| Positioning mode    | FIX            |
| Table position      | H              |
| Table position      | 0 mm           |
| MSMA                | S - C - T      |
| Sagittal            | R >> L         |
| Coronal             | A >> P         |
| Transversal         | F >> H         |
| Coil Combine Mode   | Sum of Squares |
| Save uncombined     | Off            |
| Matrix Optimization | Off            |
| AutoAlign           | Head > Brain   |
| Coil Select Mode    | Off - All      |

**System - Adjustments**

|                       |          |
|-----------------------|----------|
| B0 Shim mode          | Tune up  |
| B1 Shim mode          | TrueForm |
| Adjust with body coil | On       |



**System - Adjustments**

|                          |      |
|--------------------------|------|
| Confirm freq. adjustment | Off  |
| Assume Dominant Fat      | Off  |
| Assume Silicone          | Off  |
| Adjustment Tolerance     | Auto |

**System - Adjust Volume**

|             |             |
|-------------|-------------|
| Position    | Isocenter   |
| Orientation | Transversal |
| Rotation    | 0.00 deg    |
| A >> P      | 263 mm      |
| R >> L      | 350 mm      |
| F >> H      | 350 mm      |
| Reset       | Off         |

**System - pTx Volumes**

|              |          |
|--------------|----------|
| B1 Shim mode | TrueForm |
| Excitation   | Non-sel. |

**System - Tx/Rx**

|                     |                |
|---------------------|----------------|
| Frequency 1H        | 123.261582 MHz |
| Correction factor   | 1              |
| Gain                | Low            |
| Img. Scale Cor.     | 50.000         |
| Reset               | Off            |
| ? Ref. amplitude 1H | 0.000 V        |

**Physio - Signal1**

|                 |         |
|-----------------|---------|
| 1st Signal/Mode | None    |
| TR              | 11.0 ms |
| Concatenations  | 1       |

**Sequence - Part 1**

|                   |             |
|-------------------|-------------|
| Introduction      | Off         |
| Dimension         | 3D          |
| Contrasts         | 1           |
| Multi-slice mode  | Interleaved |
| Free echo spacing | Off         |
| Echo spacing      | 0.27 ms     |
| Bandwidth         | 4882 Hz/Px  |

**Sequence - Part 2**

|               |          |
|---------------|----------|
| EPI factor    | 32       |
| RF pulse type | Normal   |
| Gradient mode | Fast     |
| Excitation    | Non-sel. |
| RF spoiling   | On       |

**Sequence - Special**

|                   |        |
|-------------------|--------|
| Protocol filename | MPRAGE |
|-------------------|--------|

\\Research\Investigators\Baker\Holmes\_Yale\_McLean\_Dec2019\_NOEXPIRATION\T1\_MEMPRAGE\_  
GSP\_vNavTrk

TA: 2:23 PM: FIX Voxel size: 1.2×1.2×1.2 mmPAT: 4 Rel. SNR: 1.00 : tfl

### Properties

|                                               |                    |
|-----------------------------------------------|--------------------|
| Prio recon                                    | Off                |
| Load images to viewer                         | On                 |
| Inline movie                                  | Off                |
| Auto store images                             | On                 |
| Load images to stamp segments                 | Off                |
| Load images to graphic segments               | On                 |
| Auto open inline display                      | Off                |
| Auto close inline display                     | Off                |
| Start measurement without further preparation | On                 |
| Wait for user to start                        | Off                |
| Start measurements                            | Single measurement |

### Routine

|                    |                   |
|--------------------|-------------------|
| Slab group         | 1                 |
| Slabs              | 1                 |
| Dist. factor       | 50 %              |
| Position           | Isocenter         |
| Orientation        | Sagittal          |
| Phase enc. dir.    | A >> P            |
| AutoAlign          | Head > Brain      |
| Phase oversampling | 0 %               |
| Slice oversampling | 0.0 %             |
| Slices per slab    | 144               |
| FoV read           | 230 mm            |
| FoV phase          | 100.0 %           |
| Slice thickness    | 1.20 mm           |
| TR                 | 2200.0 ms         |
| TE 1               | 1.57 ms           |
| TE 2               | 3.39 ms           |
| TE 3               | 5.21 ms           |
| TE 4               | 7.03 ms           |
| Averages           | 1                 |
| Concatenations     | 1                 |
| Filter             | Prescan Normalize |
| Coil elements      | HC1-7;NC1,2       |

### Contrast - Common

|                   |             |
|-------------------|-------------|
| TR                | 2200.0 ms   |
| TE 1              | 1.57 ms     |
| TE 2              | 3.39 ms     |
| TE 3              | 5.21 ms     |
| TE 4              | 7.03 ms     |
| Magn. preparation | Non-sel. IR |
| TI                | 1100 ms     |
| Flip angle        | 7.0 deg     |
| Fat suppr.        | None        |
| Water suppr.      | None        |

### Contrast - Dynamic

|                 |                  |
|-----------------|------------------|
| Averages        | 1                |
| Averaging mode  | Long term        |
| Reconstruction  | Magnitude        |
| Measurements    | 1                |
| Multiple series | Each measurement |

### Resolution - Common

|           |         |
|-----------|---------|
| FoV read  | 230 mm  |
| FoV phase | 100.0 % |

### Resolution - Common

|                       |         |
|-----------------------|---------|
| Slice thickness       | 1.20 mm |
| Base resolution       | 192     |
| Phase resolution      | 100 %   |
| Slice resolution      | 100 %   |
| Phase partial Fourier | 6/8     |
| Slice partial Fourier | Off     |
| Interpolation         | Off     |

### Resolution - iPAT

|                     |            |
|---------------------|------------|
| PAT mode            | GRAPPA     |
| Accel. factor PE    | 4          |
| Ref. lines PE       | 32         |
| Accel. factor 3D    | 1          |
| Reference scan mode | Integrated |

### Resolution - Filter Image

|                   |     |
|-------------------|-----|
| Image Filter      | Off |
| Distortion Corr.  | Off |
| Prescan Normalize | On  |
| Unfiltered images | On  |
| Normalize         | Off |
| B1 filter         | Off |

### Resolution - Filter Rawdata

|                   |     |
|-------------------|-----|
| Raw filter        | Off |
| Elliptical filter | Off |

### Geometry - Common

|                    |             |
|--------------------|-------------|
| Slab group         | 1           |
| Slabs              | 1           |
| Dist. factor       | 50 %        |
| Position           | Isocenter   |
| Orientation        | Sagittal    |
| Phase enc. dir.    | A >> P      |
| Slice oversampling | 0.0 %       |
| Slices per slab    | 144         |
| FoV read           | 230 mm      |
| FoV phase          | 100.0 %     |
| Slice thickness    | 1.20 mm     |
| TR                 | 2200.0 ms   |
| Multi-slice mode   | Single shot |
| Series             | Interleaved |
| Concatenations     | 1           |

### Geometry - AutoAlign

|                     |              |
|---------------------|--------------|
| Slab group          | 1            |
| Position            | Isocenter    |
| Orientation         | Sagittal     |
| Phase enc. dir.     | A >> P       |
| AutoAlign           | Head > Brain |
| Initial Position    | Isocenter    |
| L                   | 0.0 mm       |
| P                   | 0.0 mm       |
| H                   | 0.0 mm       |
| Initial Rotation    | 16.00 deg    |
| Initial Orientation | Sagittal     |

### System - Miscellaneous

|                  |     |
|------------------|-----|
| Positioning mode | FIX |
|------------------|-----|

**System - Miscellaneous**

|                     |                  |
|---------------------|------------------|
| Table position      | H                |
| Table position      | 0 mm             |
| MSMA                | S - C - T        |
| Sagittal            | R >> L           |
| Coronal             | A >> P           |
| Transversal         | F >> H           |
| Coil Combine Mode   | Adaptive Combine |
| Save uncombined     | Off              |
| Matrix Optimization | Off              |
| AutoAlign           | Head > Brain     |
| Coil Select Mode    | Off - All        |

**System - Adjustments**

|                          |          |
|--------------------------|----------|
| B0 Shim mode             | Standard |
| B1 Shim mode             | TrueForm |
| Adjust with body coil    | On       |
| Confirm freq. adjustment | Off      |
| Assume Dominant Fat      | Off      |
| Assume Silicone          | Off      |
| Adjustment Tolerance     | Auto     |

**System - Adjust Volume**

|               |                   |
|---------------|-------------------|
| ! Position    | L0.0 P0.0 H6.0 mm |
| ! Orientation | T > C-16.0        |
| ! Rotation    | 0.00 deg          |
| ! A >> P      | 208 mm            |
| ! R >> L      | 208 mm            |
| ! F >> H      | 144 mm            |
| Reset         | Off               |

**System - pTx Volumes**

|              |          |
|--------------|----------|
| B1 Shim mode | TrueForm |
| Excitation   | Non-sel. |

**System - Tx/Rx**

|                     |                |
|---------------------|----------------|
| Frequency 1H        | 123.261582 MHz |
| Correction factor   | 1              |
| Gain                | Low            |
| Img. Scale Cor.     | 1.000          |
| Reset               | Off            |
| ? Ref. amplitude 1H | 0.000 V        |

**Physio - Signal1**

|                 |           |
|-----------------|-----------|
| 1st Signal/Mode | None      |
| TR              | 2200.0 ms |
| Concatenations  | 1         |

**Physio - Cardiac**

|                   |             |
|-------------------|-------------|
| Magn. preparation | Non-sel. IR |
| TI                | 1100 ms     |
| Fat suppr.        | None        |
| Dark blood        | Off         |
| FoV read          | 230 mm      |
| FoV phase         | 100.0 %     |
| Phase resolution  | 100 %       |

**Inline - Common**

|                      |     |
|----------------------|-----|
| Subtract             | Off |
| Measurements         | 1   |
| StdDev               | Off |
| Save original images | On  |

**Inline - MIP**

|                      |     |
|----------------------|-----|
| MIP-Sag              | Off |
| MIP-Cor              | Off |
| MIP-Tra              | Off |
| MIP-Time             | Off |
| Save original images | On  |

**Inline - Composing**

|                  |     |
|------------------|-----|
| Distortion Corr. | Off |
|------------------|-----|

**Sequence - Part 1**

|                     |             |
|---------------------|-------------|
| Introduction        | Off         |
| Dimension           | 3D          |
| Elliptical scanning | Off         |
| Reordering          | Linear      |
| Asymmetric echo     | Off         |
| Contrasts           | 4           |
| Flow comp. 1        | No          |
| Multi-slice mode    | Single shot |
| Echo spacing        | 9.4 ms      |
| Bandwidth 1         | 650 Hz/Px   |
| Bandwidth 2         | 650 Hz/Px   |
| Bandwidth 3         | 650 Hz/Px   |
| Bandwidth 4         | 650 Hz/Px   |

**Sequence - Part 2**

|               |          |
|---------------|----------|
| RF pulse type | Fast     |
| Gradient mode | Fast     |
| Excitation    | Non-sel. |
| RF spoiling   | On       |
| Turbo factor  | 144      |

**Sequence - Special**

|                   |                |
|-------------------|----------------|
| Readout polarity  | Positive       |
| Nav. location     | Before         |
| Apply moco to     | nav only       |
| Remeasure         | 0 TRs          |
| Reacq. threshold  | 0.50           |
| Feedback delay    | 80 ms          |
| Moco ref. image   | Use Temp Ref   |
| K-space streaming | None           |
| ABCD navigator    | On             |
| Add. grad time    | 0.0 ms         |
| Apply freq to     | parent and nav |
| Averaging         | RMS            |

**Sequence - Assistant**

|      |     |
|------|-----|
| Mode | Off |
|------|-----|

\\Research\\Investigators\\Baker\\Holmes\_Yale\_McLean\_Dec2019\_NOEXPIRATION\\T2\_vNav\_setter

TA: 0.3 s PM: FIX Voxel size: 8.0×8.0×8.0 mmRel. SNR: 1.00 : ABCD

**Properties**

|                                               |                    |
|-----------------------------------------------|--------------------|
| Prio recon                                    | Off                |
| Load images to viewer                         | On                 |
| Inline movie                                  | Off                |
| Auto store images                             | On                 |
| Load images to stamp segments                 | Off                |
| Load images to graphic segments               | Off                |
| Auto open inline display                      | Off                |
| Auto close inline display                     | Off                |
| Start measurement without further preparation | On                 |
| Wait for user to start                        | Off                |
| Start measurements                            | Single measurement |

**Routine**

|                    |                    |
|--------------------|--------------------|
| Slab group         | 1                  |
| Slabs              | 1                  |
| Dist. factor       | 50 %               |
| Position           | L0.0 P0.0 H50.0 mm |
| Orientation        | Sagittal           |
| Phase enc. dir.    | A >> P             |
| AutoAlign          | Head > Brain       |
| Phase oversampling | 0 %                |
| Slice oversampling | 0.0 %              |
| Slices per slab    | 32                 |
| FoV read           | 256 mm             |
| FoV phase          | 100.0 %            |
| Slice thickness    | 8.00 mm            |
| TR                 | 13.0 ms            |
| TE                 | 6.1 ms             |
| Averages           | 1                  |
| Concatenations     | 1                  |
| Filter             | None               |
| Coil elements      | BC                 |

**Contrast - Common**

|            |                     |
|------------|---------------------|
| TR         | 13.0 ms             |
| TE         | 6.1 ms              |
| MTC        | Off                 |
| Flip angle | 2 deg               |
| Fat suppr. | Water excit. normal |

**Contrast - Dynamic**

|                 |                  |
|-----------------|------------------|
| Averages        | 1                |
| Averaging mode  | Long term        |
| Reconstruction  | Magnitude        |
| Measurements    | 1                |
| Multiple series | Each measurement |

**Resolution - Common**

|                       |         |
|-----------------------|---------|
| FoV read              | 256 mm  |
| FoV phase             | 100.0 % |
| Slice thickness       | 8.00 mm |
| Base resolution       | 32      |
| Phase resolution      | 100 %   |
| Slice resolution      | 100 %   |
| Phase partial Fourier | Off     |
| Slice partial Fourier | 6/8     |
| Interpolation         | Off     |

**Resolution - Filter Image**

|                   |     |
|-------------------|-----|
| Distortion Corr.  | Off |
| Prescan Normalize | Off |

**Resolution - Filter Rawdata**

|                   |     |
|-------------------|-----|
| Raw filter        | Off |
| Elliptical filter | Off |
| Hamming           | Off |

**Geometry - Common**

|                    |                    |
|--------------------|--------------------|
| Slab group         | 1                  |
| Slabs              | 1                  |
| Dist. factor       | 50 %               |
| Position           | L0.0 P0.0 H50.0 mm |
| Orientation        | Sagittal           |
| Phase enc. dir.    | A >> P             |
| Slice oversampling | 0.0 %              |
| Slices per slab    | 32                 |
| FoV read           | 256 mm             |
| FoV phase          | 100.0 %            |
| Slice thickness    | 8.00 mm            |
| TR                 | 13.0 ms            |
| Multi-slice mode   | Interleaved        |
| Series             | Interleaved        |
| Concatenations     | 1                  |

**Geometry - AutoAlign**

|                     |                    |
|---------------------|--------------------|
| Slab group          | 1                  |
| Position            | L0.0 P0.0 H50.0 mm |
| Orientation         | Sagittal           |
| Phase enc. dir.     | A >> P             |
| AutoAlign           | Head > Brain       |
| Initial Position    | L0.0 P0.0 H50.0    |
| R                   | 0.0 mm             |
| A                   | 0.0 mm             |
| H                   | 50.0 mm            |
| Initial Rotation    | 0.00 deg           |
| Initial Orientation | Sagittal           |

**Geometry - Saturation**

|              |                     |
|--------------|---------------------|
| Fat suppr.   | Water excit. normal |
| Special sat. | None                |

**System - Miscellaneous**

|                     |                |
|---------------------|----------------|
| Positioning mode    | FIX            |
| Table position      | H              |
| Table position      | 0 mm           |
| MSMA                | S - C - T      |
| Sagittal            | R >> L         |
| Coronal             | A >> P         |
| Transversal         | F >> H         |
| Coil Combine Mode   | Sum of Squares |
| Save uncombined     | Off            |
| Matrix Optimization | Off            |
| AutoAlign           | Head > Brain   |
| Coil Select Mode    | Off - All      |

**System - Adjustments**

|                       |          |
|-----------------------|----------|
| B0 Shim mode          | Tune up  |
| B1 Shim mode          | TrueForm |
| Adjust with body coil | On       |

**System - Adjustments**

|                          |      |
|--------------------------|------|
| Confirm freq. adjustment | Off  |
| Assume Dominant Fat      | Off  |
| Assume Silicone          | Off  |
| Adjustment Tolerance     | Auto |

**System - Adjust Volume**

|             |             |
|-------------|-------------|
| Position    | Isocenter   |
| Orientation | Transversal |
| Rotation    | 0.00 deg    |
| A >> P      | 263 mm      |
| R >> L      | 350 mm      |
| F >> H      | 350 mm      |
| Reset       | Off         |

**System - pTx Volumes**

|              |          |
|--------------|----------|
| B1 Shim mode | TrueForm |
| Excitation   | Non-sel. |

**System - Tx/Rx**

|                     |                |
|---------------------|----------------|
| Frequency 1H        | 123.261582 MHz |
| Correction factor   | 1              |
| Gain                | Low            |
| Img. Scale Cor.     | 5.000          |
| Reset               | Off            |
| ? Ref. amplitude 1H | 0.000 V        |

**Physio - Signal1**

|                 |         |
|-----------------|---------|
| 1st Signal/Mode | None    |
| TR              | 13.0 ms |
| Concatenations  | 1       |

**Sequence - Part 1**

|                   |             |
|-------------------|-------------|
| Introduction      | Off         |
| Dimension         | 3D          |
| Contrasts         | 1           |
| Multi-slice mode  | Interleaved |
| Free echo spacing | Off         |
| Echo spacing      | 0.27 ms     |
| Bandwidth         | 4882 Hz/Px  |

**Sequence - Part 2**

|               |          |
|---------------|----------|
| EPI factor    | 32       |
| RF pulse type | Normal   |
| Gradient mode | Fast     |
| Excitation    | Non-sel. |
| RF spoiling   | On       |

**Sequence - Special**

|                   |          |
|-------------------|----------|
| Protocol filename | T2-SPACE |
|-------------------|----------|

\\Research\\Investigators\\Baker\\Holmes\_Yale\_McLean\_Dec2019\_NOEXPIRATION\\T2\_SPACE\_GSP\_vNavTrk

TA: 2:37 PM: FIX Voxel size: 1.2×1.2×1.2 mmPAT: 2 Rel. SNR: 1.00 : spc

### Properties

|                                               |                    |
|-----------------------------------------------|--------------------|
| Prio recon                                    | Off                |
| Load images to viewer                         | On                 |
| Inline movie                                  | Off                |
| Auto store images                             | On                 |
| Load images to stamp segments                 | Off                |
| Load images to graphic segments               | Off                |
| Auto open inline display                      | Off                |
| Auto close inline display                     | Off                |
| Start measurement without further preparation | On                 |
| Wait for user to start                        | Off                |
| Start measurements                            | Single measurement |

### Routine

|                    |                                  |
|--------------------|----------------------------------|
| Slab group         | 1                                |
| Slabs              | 1                                |
| Position           | Isocenter                        |
| Orientation        | Sagittal                         |
| Phase enc. dir.    | A >> P                           |
| AutoAlign          | Head > Brain                     |
| Phase oversampling | 0 %                              |
| Slice oversampling | 0.0 %                            |
| Slices per slab    | 144                              |
| FoV read           | 230 mm                           |
| FoV phase          | 100.0 %                          |
| Slice thickness    | 1.20 mm                          |
| TR                 | 2800 ms                          |
| TE                 | 326 ms                           |
| Averages           | 1.0                              |
| Concatenations     | 1                                |
| Filter             | Raw filter, Prescan<br>Normalize |
| Coil elements      | HC1-7;NC1,2                      |

### Contrast - Common

|                   |         |
|-------------------|---------|
| TR                | 2800 ms |
| TE                | 326 ms  |
| MTC               | Off     |
| Magn. preparation | None    |
| Fat suppr.        | None    |
| Blood suppr.      | Off     |
| Restore magn.     | Off     |

### Contrast - Dynamic

|                 |                  |
|-----------------|------------------|
| Averages        | 1.0              |
| Reconstruction  | Magnitude        |
| Measurements    | 1                |
| Multiple series | Each measurement |

### Resolution - Common

|                       |         |
|-----------------------|---------|
| FoV read              | 230 mm  |
| FoV phase             | 100.0 % |
| Slice thickness       | 1.20 mm |
| Base resolution       | 192     |
| Phase resolution      | 100 %   |
| Slice resolution      | 100 %   |
| Phase partial Fourier | Allowed |
| Slice partial Fourier | 6/8     |
| Interpolation         | Off     |

### Resolution - iPAT

|                     |            |
|---------------------|------------|
| PAT mode            | GRAPPA     |
| Accel. factor PE    | 2          |
| Ref. lines PE       | 24         |
| Accel. factor 3D    | 1          |
| Reference scan mode | Integrated |

### Resolution - Filter Image

|                   |     |
|-------------------|-----|
| Image Filter      | Off |
| Distortion Corr.  | Off |
| Prescan Normalize | On  |
| Unfiltered images | On  |
| Normalize         | Off |
| B1 filter         | Off |

### Resolution - Filter Rawdata

|                   |     |
|-------------------|-----|
| Raw filter        | On  |
| Elliptical filter | Off |

### Geometry - Common

|                    |           |
|--------------------|-----------|
| Slab group         | 1         |
| Slabs              | 1         |
| Position           | Isocenter |
| Orientation        | Sagittal  |
| Phase enc. dir.    | A >> P    |
| Slice oversampling | 0.0 %     |
| Slices per slab    | 144       |
| FoV read           | 230 mm    |
| FoV phase          | 100.0 %   |
| Slice thickness    | 1.20 mm   |
| TR                 | 2800 ms   |
| Concatenations     | 1         |

### Geometry - AutoAlign

|                     |              |
|---------------------|--------------|
| Slab group          | 1            |
| Position            | Isocenter    |
| Orientation         | Sagittal     |
| Phase enc. dir.     | A >> P       |
| AutoAlign           | Head > Brain |
| Initial Position    | Isocenter    |
| L                   | 0.0 mm       |
| P                   | 0.0 mm       |
| H                   | 0.0 mm       |
| Initial Rotation    | 16.00 deg    |
| Initial Orientation | Sagittal     |

### Geometry - Saturation

|               |      |
|---------------|------|
| Fat suppr.    | None |
| Restore magn. | Off  |
| Special sat.  | None |

### System - Miscellaneous

|                   |                  |
|-------------------|------------------|
| Positioning mode  | FIX              |
| Table position    | H                |
| Table position    | 0 mm             |
| MSMA              | S - C - T        |
| Sagittal          | R >> L           |
| Coronal           | A >> P           |
| Transversal       | F >> H           |
| Coil Combine Mode | Adaptive Combine |

**System - Miscellaneous**

|                     |              |
|---------------------|--------------|
| Save uncombined     | Off          |
| Matrix Optimization | Off          |
| AutoAlign           | Head > Brain |
| Coil Select Mode    | Off - All    |

**System - Adjustments**

|                          |          |
|--------------------------|----------|
| B0 Shim mode             | Standard |
| B1 Shim mode             | TrueForm |
| Adjust with body coil    | On       |
| Confirm freq. adjustment | Off      |
| Assume Dominant Fat      | Off      |
| Assume Silicone          | Off      |
| Adjustment Tolerance     | Auto     |

**System - Adjust Volume**

|               |                   |
|---------------|-------------------|
| ! Position    | L0.0 P0.0 H6.0 mm |
| ! Orientation | T > C-16.0        |
| ! Rotation    | 0.00 deg          |
| ! A >> P      | 208 mm            |
| ! R >> L      | 208 mm            |
| ! F >> H      | 144 mm            |
| Reset         | Off               |

**System - pTx Volumes**

|              |          |
|--------------|----------|
| B1 Shim mode | TrueForm |
| Excitation   | Non-sel. |

**System - Tx/Rx**

|                     |                |
|---------------------|----------------|
| Frequency 1H        | 123.261582 MHz |
| Correction factor   | 1              |
| Gain                | High           |
| Img. Scale Cor.     | 1.000          |
| Reset               | Off            |
| ? Ref. amplitude 1H | 0.000 V        |

**Physio - Signal1**

|                 |         |
|-----------------|---------|
| 1st Signal/Mode | None    |
| Trigger delay   | 0 ms    |
| TR              | 2800 ms |
| Concatenations  | 1       |

**Physio - Cardiac**

|                   |         |
|-------------------|---------|
| Magn. preparation | None    |
| Fat suppr.        | None    |
| Dark blood        | Off     |
| FoV read          | 230 mm  |
| FoV phase         | 100.0 % |
| Phase resolution  | 100 %   |

**Inline - Common**

|                      |     |
|----------------------|-----|
| Subtract             | Off |
| Measurements         | 1   |
| StdDev               | Off |
| Save original images | On  |

**Inline - MIP**

|                      |     |
|----------------------|-----|
| MIP-Sag              | Off |
| MIP-Cor              | Off |
| MIP-Tra              | Off |
| MIP-Time             | Off |
| Save original images | On  |

**Inline - Composing**

|                  |     |
|------------------|-----|
| Distortion Corr. | Off |
|------------------|-----|

**Sequence - Part 1**

|                     |           |
|---------------------|-----------|
| Introduction        | Off       |
| Dimension           | 3D        |
| Elliptical scanning | Off       |
| Reordering          | Linear    |
| Flow comp.          | No        |
| Echo spacing        | 3.5 ms    |
| Adiabatic-mode      | Off       |
| Bandwidth           | 651 Hz/Px |

**Sequence - Part 2**

|                     |          |
|---------------------|----------|
| Echo train duration | 693 ms   |
| RF pulse type       | Normal   |
| Gradient mode       | Fast     |
| Excitation          | Non-sel. |
| Flip angle mode     | T2 var   |
| Turbo factor        | 212      |

**Sequence - Special**

|                   |                |
|-------------------|----------------|
| Include nav.      | On             |
| Apply moco to     | nav only       |
| Remeasure         | 0 TRs          |
| Reacq. threshold  | 0.50           |
| Feedback delay    | 80 ms          |
| Moco ref. image   | Use Temp Ref   |
| K-space streaming | None           |
| ABCD navigator    | On             |
| Apply freq to     | parent and nav |

**Sequence - Assistant**

|               |     |
|---------------|-----|
| Allowed delay | 0 s |
|---------------|-----|

\\Research\\Investigators\\Baker\\Holmes\_Yale\_McLean\_Dec2019\_NOEXPIRATION\\SpinEchoFieldMap\_AP

TA: 8.0 s PM: REF Voxel size: 2.0×2.0×2.0 mmPAT: Off Rel. SNR: 1.00 : epse

### Properties

|                                               |                    |
|-----------------------------------------------|--------------------|
| Prio recon                                    | Off                |
| Load images to viewer                         | On                 |
| Inline movie                                  | Off                |
| Auto store images                             | On                 |
| Load images to stamp segments                 | Off                |
| Load images to graphic segments               | Off                |
| Auto open inline display                      | On                 |
| Auto close inline display                     | Off                |
| Start measurement without further preparation | On                 |
| Wait for user to start                        | Off                |
| Start measurements                            | Single measurement |

### Routine

|                          |                   |
|--------------------------|-------------------|
| Slice group              | 1                 |
| Slices                   | 72                |
| Dist. factor             | 0 %               |
| Position                 | L0.0 P0.0 H6.0 mm |
| Orientation              | T > C-16.0        |
| Phase enc. dir.          | A >> P            |
| AutoAlign                | Head > Brain      |
| Phase oversampling       | 0 %               |
| FoV read                 | 208 mm            |
| FoV phase                | 100.0 %           |
| Slice thickness          | 2.00 mm           |
| TR                       | 8000 ms           |
| TE                       | 66.00 ms          |
| Multi-band accel. factor | 1                 |
| Filter                   | None              |
| Coil elements            | HC1-7;NC1,2       |

### Contrast - Common

|                       |          |
|-----------------------|----------|
| TR                    | 8000 ms  |
| TE                    | 66.00 ms |
| MTC                   | Off      |
| Magn. preparation     | None     |
| Flip angle            | 90 deg   |
| Refocus flip angle    | 180 deg  |
| Fat suppr.            | Fat sat. |
| Grad. rev. fat suppr. | Disabled |

### Contrast - Dynamic

|                 |           |
|-----------------|-----------|
| Averaging mode  | Long term |
| Reconstruction  | Magnitude |
| Measurements    | 1         |
| Delay in TR     | 0 ms      |
| Multiple series | Off       |

### Resolution - Common

|                       |         |
|-----------------------|---------|
| FoV read              | 208 mm  |
| FoV phase             | 100.0 % |
| Slice thickness       | 2.00 mm |
| Base resolution       | 104     |
| Phase resolution      | 100 %   |
| Phase partial Fourier | Off     |
| Interpolation         | Off     |

### Resolution - iPAT

|          |      |
|----------|------|
| PAT mode | None |
|----------|------|

### Resolution - Filter Image

|                   |     |
|-------------------|-----|
| Distortion Corr.  | Off |
| Prescan Normalize | Off |

### Resolution - Filter Rawdata

|                   |     |
|-------------------|-----|
| Raw filter        | Off |
| Elliptical filter | Off |
| Hamming           | Off |

### Geometry - Common

|                          |                   |
|--------------------------|-------------------|
| Slice group              | 1                 |
| Slices                   | 72                |
| Dist. factor             | 0 %               |
| Position                 | L0.0 P0.0 H6.0 mm |
| Orientation              | T > C-16.0        |
| Phase enc. dir.          | A >> P            |
| FoV read                 | 208 mm            |
| FoV phase                | 100.0 %           |
| Slice thickness          | 2.00 mm           |
| TR                       | 8000 ms           |
| Multi-slice mode         | Interleaved       |
| Series                   | Interleaved       |
| Multi-band accel. factor | 1                 |

### Geometry - AutoAlign

|                     |                   |
|---------------------|-------------------|
| Slice group         | 1                 |
| Position            | L0.0 P0.0 H6.0 mm |
| Orientation         | T > C-16.0        |
| Phase enc. dir.     | A >> P            |
| AutoAlign           | Head > Brain      |
| Initial Position    | L0.0 P0.0 H6.0    |
| L                   | 0.0 mm            |
| P                   | 0.0 mm            |
| H                   | 6.0 mm            |
| Initial Rotation    | 0.00 deg          |
| Initial Orientation | T > C             |
| T > C               | -16.0             |
| > S                 | 0.0               |

### Geometry - Saturation

|                       |          |
|-----------------------|----------|
| Fat suppr.            | Fat sat. |
| Grad. rev. fat suppr. | Disabled |
| Special sat.          | None     |

### System - Miscellaneous

|                     |                |
|---------------------|----------------|
| Positioning mode    | REF            |
| Table position      | H              |
| Table position      | 0 mm           |
| MSMA                | S - C - T      |
| Sagittal            | R >> L         |
| Coronal             | A >> P         |
| Transversal         | F >> H         |
| Coil Combine Mode   | Sum of Squares |
| Matrix Optimization | Off            |
| AutoAlign           | Head > Brain   |
| Coil Select Mode    | Off - All      |

### System - Adjustments

|              |          |
|--------------|----------|
| B0 Shim mode | Standard |
| B1 Shim mode | TrueForm |



**System - Adjustments**

|                          |      |
|--------------------------|------|
| Adjust with body coil    | On   |
| Confirm freq. adjustment | Off  |
| Assume Dominant Fat      | Off  |
| Assume Silicone          | Off  |
| Adjustment Tolerance     | Auto |

**System - Adjust Volume**

|             |                   |
|-------------|-------------------|
| Position    | L0.0 P0.0 H6.0 mm |
| Orientation | T > C-16.0        |
| Rotation    | 0.00 deg          |
| A >> P      | 208 mm            |
| R >> L      | 208 mm            |
| F >> H      | 144 mm            |
| Reset       | Off               |

**System - pTx Volumes**

|              |          |
|--------------|----------|
| B1 Shim mode | TrueForm |
| Excitation   | Standard |

**System - Tx/Rx**

|                     |                |
|---------------------|----------------|
| Frequency 1H        | 123.261582 MHz |
| Correction factor   | 1              |
| Gain                | High           |
| Img. Scale Cor.     | 1.000          |
| Reset               | Off            |
| ? Ref. amplitude 1H | 0.000 V        |

**Physio - Signal1**

|                          |         |
|--------------------------|---------|
| 1st Signal/Mode          | None    |
| TR                       | 8000 ms |
| Multi-band accel. factor | 1       |

**BOLD**

|                         |          |
|-------------------------|----------|
| GLM Statistics          | Off      |
| Dynamic t-maps          | Off      |
| Ignore meas. at start   | 0        |
| Ignore after transition | 0        |
| Model transition states | Off      |
| Temp. highpass filter   | Off      |
| Threshold               | 4.00     |
| Paradigm size           | 3        |
| Meas[1]                 | Baseline |
| Meas[2]                 | Baseline |
| Meas[3]                 | Active   |
| Motion correction       | Off      |
| Spatial filter          | Off      |
| Measurements            | 1        |
| Delay in TR             | 0 ms     |
| Multiple series         | Off      |

**Sequence - Part 1**

|                   |             |
|-------------------|-------------|
| Introduction      | Off         |
| Contrasts         | 1           |
| Multi-slice mode  | Interleaved |
| Free echo spacing | On          |
| Echo spacing      | 0.58 ms     |
| Bandwidth         | 2290 Hz/Px  |

**Sequence - Part 2**

|               |             |
|---------------|-------------|
| EPI factor    | 104         |
| RF pulse type | Normal      |
| Gradient mode | Performance |
| Excitation    | Standard    |

**Sequence - Special**

|                          |          |
|--------------------------|----------|
| SENSE1 coil combine      | Off      |
| Invert RO/PE polarity    | Off      |
| Disable freq. update     | Off      |
| Force equal slice timing | Off      |
| FFT scale factor         | 1.00     |
| Physio recording         | Off      |
| Triggering scheme        | Standard |

\\Research\\Investigators\\Baker\\Holmes\_Yale\_McLean\_Dec2019\_NOEXPIRATION\\SpinEchoFieldMap\_PA

TA: 8.0 s PM: REF Voxel size: 2.0x2.0x2.0 mmPAT: Off Rel. SNR: 1.00 : epse

### Properties

|                                               |                    |
|-----------------------------------------------|--------------------|
| Prio recon                                    | Off                |
| Load images to viewer                         | On                 |
| Inline movie                                  | Off                |
| Auto store images                             | On                 |
| Load images to stamp segments                 | Off                |
| Load images to graphic segments               | Off                |
| Auto open inline display                      | Off                |
| Auto close inline display                     | Off                |
| Start measurement without further preparation | On                 |
| Wait for user to start                        | Off                |
| Start measurements                            | Single measurement |

### Routine

|                          |                   |
|--------------------------|-------------------|
| Slice group              | 1                 |
| Slices                   | 72                |
| Dist. factor             | 0 %               |
| Position                 | L0.0 P0.0 H6.0 mm |
| Orientation              | T > C-16.0        |
| Phase enc. dir.          | A >> P            |
| AutoAlign                | Head > Brain      |
| Phase oversampling       | 0 %               |
| FoV read                 | 208 mm            |
| FoV phase                | 100.0 %           |
| Slice thickness          | 2.00 mm           |
| TR                       | 8000 ms           |
| TE                       | 66.00 ms          |
| Multi-band accel. factor | 1                 |
| Filter                   | None              |
| Coil elements            | HC1-7;NC1,2       |

### Contrast - Common

|                       |          |
|-----------------------|----------|
| TR                    | 8000 ms  |
| TE                    | 66.00 ms |
| MTC                   | Off      |
| Magn. preparation     | None     |
| Flip angle            | 90 deg   |
| Refocus flip angle    | 180 deg  |
| Fat suppr.            | Fat sat. |
| Grad. rev. fat suppr. | Disabled |

### Contrast - Dynamic

|                 |           |
|-----------------|-----------|
| Averaging mode  | Long term |
| Reconstruction  | Magnitude |
| Measurements    | 1         |
| Delay in TR     | 0 ms      |
| Multiple series | Off       |

### Resolution - Common

|                       |         |
|-----------------------|---------|
| FoV read              | 208 mm  |
| FoV phase             | 100.0 % |
| Slice thickness       | 2.00 mm |
| Base resolution       | 104     |
| Phase resolution      | 100 %   |
| Phase partial Fourier | Off     |
| Interpolation         | Off     |

### Resolution - iPAT

|          |      |
|----------|------|
| PAT mode | None |
|----------|------|

### Resolution - Filter Image

|                   |     |
|-------------------|-----|
| Distortion Corr.  | Off |
| Prescan Normalize | Off |

### Resolution - Filter Rawdata

|                   |     |
|-------------------|-----|
| Raw filter        | Off |
| Elliptical filter | Off |
| Hamming           | Off |

### Geometry - Common

|                          |                   |
|--------------------------|-------------------|
| Slice group              | 1                 |
| Slices                   | 72                |
| Dist. factor             | 0 %               |
| Position                 | L0.0 P0.0 H6.0 mm |
| Orientation              | T > C-16.0        |
| Phase enc. dir.          | A >> P            |
| FoV read                 | 208 mm            |
| FoV phase                | 100.0 %           |
| Slice thickness          | 2.00 mm           |
| TR                       | 8000 ms           |
| Multi-slice mode         | Interleaved       |
| Series                   | Interleaved       |
| Multi-band accel. factor | 1                 |

### Geometry - AutoAlign

|                     |                   |
|---------------------|-------------------|
| Slice group         | 1                 |
| Position            | L0.0 P0.0 H6.0 mm |
| Orientation         | T > C-16.0        |
| Phase enc. dir.     | A >> P            |
| AutoAlign           | Head > Brain      |
| Initial Position    | L0.0 P0.0 H6.0    |
| L                   | 0.0 mm            |
| P                   | 0.0 mm            |
| H                   | 6.0 mm            |
| Initial Rotation    | 0.00 deg          |
| Initial Orientation | T > C             |
| T > C               | -16.0             |
| > S                 | 0.0               |

### Geometry - Saturation

|                       |          |
|-----------------------|----------|
| Fat suppr.            | Fat sat. |
| Grad. rev. fat suppr. | Disabled |
| Special sat.          | None     |

### System - Miscellaneous

|                     |                |
|---------------------|----------------|
| Positioning mode    | REF            |
| Table position      | H              |
| Table position      | 0 mm           |
| MSMA                | S - C - T      |
| Sagittal            | R >> L         |
| Coronal             | A >> P         |
| Transversal         | F >> H         |
| Coil Combine Mode   | Sum of Squares |
| Matrix Optimization | Off            |
| AutoAlign           | Head > Brain   |
| Coil Select Mode    | Off - All      |

### System - Adjustments

|              |          |
|--------------|----------|
| B0 Shim mode | Standard |
| B1 Shim mode | TrueForm |

**System - Adjustments**

|                          |      |
|--------------------------|------|
| Adjust with body coil    | On   |
| Confirm freq. adjustment | Off  |
| Assume Dominant Fat      | Off  |
| Assume Silicone          | Off  |
| Adjustment Tolerance     | Auto |

**System - Adjust Volume**

|             |                   |
|-------------|-------------------|
| Position    | L0.0 P0.0 H6.0 mm |
| Orientation | T > C-16.0        |
| Rotation    | 0.00 deg          |
| A >> P      | 208 mm            |
| R >> L      | 208 mm            |
| F >> H      | 144 mm            |
| Reset       | Off               |

**System - pTx Volumes**

|              |          |
|--------------|----------|
| B1 Shim mode | TrueForm |
| Excitation   | Standard |

**System - Tx/Rx**

|                     |                |
|---------------------|----------------|
| Frequency 1H        | 123.261582 MHz |
| Correction factor   | 1              |
| Gain                | High           |
| Img. Scale Cor.     | 1.000          |
| Reset               | Off            |
| ? Ref. amplitude 1H | 0.000 V        |

**Physio - Signal1**

|                          |         |
|--------------------------|---------|
| 1st Signal/Mode          | None    |
| TR                       | 8000 ms |
| Multi-band accel. factor | 1       |

**BOLD**

|                         |          |
|-------------------------|----------|
| GLM Statistics          | Off      |
| Dynamic t-maps          | Off      |
| Ignore meas. at start   | 0        |
| Ignore after transition | 0        |
| Model transition states | Off      |
| Temp. highpass filter   | Off      |
| Threshold               | 4.00     |
| Paradigm size           | 3        |
| Meas[1]                 | Baseline |
| Meas[2]                 | Baseline |
| Meas[3]                 | Active   |
| Motion correction       | Off      |
| Spatial filter          | Off      |
| Measurements            | 1        |
| Delay in TR             | 0 ms     |
| Multiple series         | Off      |

**Sequence - Part 1**

|                   |             |
|-------------------|-------------|
| Introduction      | Off         |
| Contrasts         | 1           |
| Multi-slice mode  | Interleaved |
| Free echo spacing | On          |
| Echo spacing      | 0.58 ms     |
| Bandwidth         | 2290 Hz/Px  |

**Sequence - Part 2**

|               |             |
|---------------|-------------|
| EPI factor    | 104         |
| RF pulse type | Normal      |
| Gradient mode | Performance |
| Excitation    | Standard    |

**Sequence - Special**

|                          |          |
|--------------------------|----------|
| SENSE1 coil combine      | Off      |
| Invert RO/PE polarity    | On       |
| Disable freq. update     | Off      |
| Force equal slice timing | Off      |
| FFT scale factor         | 1.00     |
| Physio recording         | Off      |
| Triggering scheme        | Standard |

\\Research\\Investigators\\Baker\\Holmes\_Yale\_McLean\_Dec2019\_NOEXPIRATION\\rfMRI\_REST\_AP

TA: 6:40 PM: REF Voxel size: 2.0×2.0×2.0 mmPAT: Off Rel. SNR: 1.00 : epfid

**Properties**

|                                               |                    |
|-----------------------------------------------|--------------------|
| Prio recon                                    | Off                |
| Load images to viewer                         | On                 |
| Inline movie                                  | Off                |
| Auto store images                             | On                 |
| Load images to stamp segments                 | Off                |
| Load images to graphic segments               | Off                |
| Auto open inline display                      | On                 |
| Auto close inline display                     | Off                |
| Start measurement without further preparation | Off                |
| Wait for user to start                        | On                 |
| Start measurements                            | Single measurement |

**Routine**

|                          |                   |
|--------------------------|-------------------|
| Slice group              | 1                 |
| Slices                   | 72                |
| Dist. factor             | 0 %               |
| Position                 | L0.0 P0.0 H6.0 mm |
| Orientation              | T > C-16.0        |
| Phase enc. dir.          | A >> P            |
| AutoAlign                | Head > Brain      |
| Phase oversampling       | 0 %               |
| FoV read                 | 208 mm            |
| FoV phase                | 100.0 %           |
| Slice thickness          | 2.00 mm           |
| TR                       | 800 ms            |
| TE                       | 37.00 ms          |
| Multi-band accel. factor | 8                 |
| Filter                   | None              |
| Coil elements            | HC1-7;NC1,2       |

**Contrast - Common**

|                   |          |
|-------------------|----------|
| TR                | 800 ms   |
| TE                | 37.00 ms |
| MTC               | Off      |
| Magn. preparation | None     |
| Flip angle        | 52 deg   |
| Fat suppr.        | Fat sat. |

**Contrast - Dynamic**

|                 |           |
|-----------------|-----------|
| Averaging mode  | Long term |
| Reconstruction  | Magnitude |
| Measurements    | 488       |
| Delay in TR     | 0 ms      |
| Multiple series | Off       |

**Resolution - Common**

|                       |         |
|-----------------------|---------|
| FoV read              | 208 mm  |
| FoV phase             | 100.0 % |
| Slice thickness       | 2.00 mm |
| Base resolution       | 104     |
| Phase resolution      | 100 %   |
| Phase partial Fourier | Off     |
| Interpolation         | Off     |

**Resolution - iPAT**

|          |      |
|----------|------|
| PAT mode | None |
|----------|------|

**Resolution - Filter Image**

|                  |     |
|------------------|-----|
| Distortion Corr. | Off |
|------------------|-----|

**Resolution - Filter Image**

|                   |     |
|-------------------|-----|
| Prescan Normalize | Off |
|-------------------|-----|

**Resolution - Filter Rawdata**

|                   |     |
|-------------------|-----|
| Raw filter        | Off |
| Elliptical filter | Off |
| Hamming           | Off |

**Geometry - Common**

|                          |                   |
|--------------------------|-------------------|
| Slice group              | 1                 |
| Slices                   | 72                |
| Dist. factor             | 0 %               |
| Position                 | L0.0 P0.0 H6.0 mm |
| Orientation              | T > C-16.0        |
| Phase enc. dir.          | A >> P            |
| FoV read                 | 208 mm            |
| FoV phase                | 100.0 %           |
| Slice thickness          | 2.00 mm           |
| TR                       | 800 ms            |
| Multi-slice mode         | Interleaved       |
| Series                   | Interleaved       |
| Multi-band accel. factor | 8                 |

**Geometry - AutoAlign**

|                     |                   |
|---------------------|-------------------|
| Slice group         | 1                 |
| Position            | L0.0 P0.0 H6.0 mm |
| Orientation         | T > C-16.0        |
| Phase enc. dir.     | A >> P            |
| AutoAlign           | Head > Brain      |
| Initial Position    | L0.0 P0.0 H6.0    |
| L                   | 0.0 mm            |
| P                   | 0.0 mm            |
| H                   | 6.0 mm            |
| Initial Rotation    | 0.00 deg          |
| Initial Orientation | T > C             |
| T > C               | -16.0             |
| > S                 | 0.0               |

**Geometry - Saturation**

|              |          |
|--------------|----------|
| Fat suppr.   | Fat sat. |
| Special sat. | None     |

**System - Miscellaneous**

|                     |                |
|---------------------|----------------|
| Positioning mode    | REF            |
| Table position      | H              |
| Table position      | 0 mm           |
| MSMA                | S - C - T      |
| Sagittal            | R >> L         |
| Coronal             | A >> P         |
| Transversal         | F >> H         |
| Coil Combine Mode   | Sum of Squares |
| Matrix Optimization | Performance    |
| AutoAlign           | Head > Brain   |
| Coil Select Mode    | Off - All      |

**System - Adjustments**

|                          |          |
|--------------------------|----------|
| B0 Shim mode             | Standard |
| B1 Shim mode             | TrueForm |
| Adjust with body coil    | On       |
| Confirm freq. adjustment | Off      |
| Assume Dominant Fat      | Off      |

**System - Adjustments**

|                      |      |
|----------------------|------|
| Assume Silicone      | Off  |
| Adjustment Tolerance | Auto |

**System - Adjust Volume**

|             |                   |
|-------------|-------------------|
| Position    | L0.0 P0.0 H6.0 mm |
| Orientation | T > C-16.0        |
| Rotation    | 0.00 deg          |
| A >> P      | 208 mm            |
| R >> L      | 208 mm            |
| F >> H      | 144 mm            |
| Reset       | Off               |

**System - pTx Volumes**

|              |          |
|--------------|----------|
| B1 Shim mode | TrueForm |
| Excitation   | Standard |

**System - Tx/Rx**

|                     |                |
|---------------------|----------------|
| Frequency 1H        | 123.261582 MHz |
| Correction factor   | 1              |
| Gain                | High           |
| Img. Scale Cor.     | 1.000          |
| Reset               | Off            |
| ? Ref. amplitude 1H | 0.000 V        |

**Physio - Signal1**

|                          |        |
|--------------------------|--------|
| 1st Signal/Mode          | None   |
| TR                       | 800 ms |
| Multi-band accel. factor | 8      |

**BOLD**

|                         |          |
|-------------------------|----------|
| GLM Statistics          | Off      |
| Dynamic t-maps          | Off      |
| Ignore meas. at start   | 0        |
| Ignore after transition | 0        |
| Model transition states | On       |
| Temp. highpass filter   | On       |
| Threshold               | 4.00     |
| Paradigm size           | 3        |
| Meas[1]                 | Baseline |
| Meas[2]                 | Baseline |
| Meas[3]                 | Active   |
| Motion correction       | Off      |
| Spatial filter          | Off      |
| Measurements            | 488      |
| Delay in TR             | 0 ms     |
| Multiple series         | Off      |

**Sequence - Part 1**

|                   |             |
|-------------------|-------------|
| Introduction      | Off         |
| Contrasts         | 1           |
| Flow comp.        | No          |
| Multi-slice mode  | Interleaved |
| Free echo spacing | Off         |
| Echo spacing      | 0.58 ms     |
| Bandwidth         | 2290 Hz/Px  |

**Sequence - Part 2**

|               |             |
|---------------|-------------|
| EPI factor    | 104         |
| Gradient mode | Performance |
| Excitation    | Standard    |
| RF spoiling   | Off         |

**Sequence - Special**

|                          |          |
|--------------------------|----------|
| Excite pulse duration    | 6600 us  |
| Single-band images       | On       |
| MB LeakBlock kernel      | On       |
| MB dual kernel           | Off      |
| MB RF phase scramble     | Off      |
| SENSE1 coil combine      | Off      |
| Invert RO/PE polarity    | Off      |
| Disable freq. update     | Off      |
| Force equal slice timing | Off      |
| Online multi-band recon. | Online   |
| FFT scale factor         | 1.00     |
| Physio recording         | DICOM    |
| Triggering scheme        | Standard |

\\Research\\Investigators\\Baker\\Holmes\_Yale\_McLean\_Dec2019\_NOEXPIRATION\\rfMRI\_REST\_PA

TA: 6:40 PM: REF Voxel size: 2.0×2.0×2.0 mmPAT: Off Rel. SNR: 1.00 : epfid

**Properties**

|                                               |                    |
|-----------------------------------------------|--------------------|
| Prio recon                                    | Off                |
| Load images to viewer                         | On                 |
| Inline movie                                  | Off                |
| Auto store images                             | On                 |
| Load images to stamp segments                 | Off                |
| Load images to graphic segments               | Off                |
| Auto open inline display                      | Off                |
| Auto close inline display                     | Off                |
| Start measurement without further preparation | On                 |
| Wait for user to start                        | On                 |
| Start measurements                            | Single measurement |

**Routine**

|                          |                   |
|--------------------------|-------------------|
| Slice group              | 1                 |
| Slices                   | 72                |
| Dist. factor             | 0 %               |
| Position                 | L0.0 P0.0 H6.0 mm |
| Orientation              | T > C-16.0        |
| Phase enc. dir.          | A >> P            |
| AutoAlign                | Head > Brain      |
| Phase oversampling       | 0 %               |
| FoV read                 | 208 mm            |
| FoV phase                | 100.0 %           |
| Slice thickness          | 2.00 mm           |
| TR                       | 800 ms            |
| TE                       | 37.00 ms          |
| Multi-band accel. factor | 8                 |
| Filter                   | None              |
| Coil elements            | HC1-7;NC1,2       |

**Contrast - Common**

|                   |          |
|-------------------|----------|
| TR                | 800 ms   |
| TE                | 37.00 ms |
| MTC               | Off      |
| Magn. preparation | None     |
| Flip angle        | 52 deg   |
| Fat suppr.        | Fat sat. |

**Contrast - Dynamic**

|                 |           |
|-----------------|-----------|
| Averaging mode  | Long term |
| Reconstruction  | Magnitude |
| Measurements    | 488       |
| Delay in TR     | 0 ms      |
| Multiple series | Off       |

**Resolution - Common**

|                       |         |
|-----------------------|---------|
| FoV read              | 208 mm  |
| FoV phase             | 100.0 % |
| Slice thickness       | 2.00 mm |
| Base resolution       | 104     |
| Phase resolution      | 100 %   |
| Phase partial Fourier | Off     |
| Interpolation         | Off     |

**Resolution - iPAT**

|          |      |
|----------|------|
| PAT mode | None |
|----------|------|

**Resolution - Filter Image**

|                  |     |
|------------------|-----|
| Distortion Corr. | Off |
|------------------|-----|

**Resolution - Filter Image**

|                   |     |
|-------------------|-----|
| Prescan Normalize | Off |
|-------------------|-----|

**Resolution - Filter Rawdata**

|                   |     |
|-------------------|-----|
| Raw filter        | Off |
| Elliptical filter | Off |
| Hamming           | Off |

**Geometry - Common**

|                          |                   |
|--------------------------|-------------------|
| Slice group              | 1                 |
| Slices                   | 72                |
| Dist. factor             | 0 %               |
| Position                 | L0.0 P0.0 H6.0 mm |
| Orientation              | T > C-16.0        |
| Phase enc. dir.          | A >> P            |
| FoV read                 | 208 mm            |
| FoV phase                | 100.0 %           |
| Slice thickness          | 2.00 mm           |
| TR                       | 800 ms            |
| Multi-slice mode         | Interleaved       |
| Series                   | Interleaved       |
| Multi-band accel. factor | 8                 |

**Geometry - AutoAlign**

|                     |                   |
|---------------------|-------------------|
| Slice group         | 1                 |
| Position            | L0.0 P0.0 H6.0 mm |
| Orientation         | T > C-16.0        |
| Phase enc. dir.     | A >> P            |
| AutoAlign           | Head > Brain      |
| Initial Position    | L0.0 P0.0 H6.0    |
| L                   | 0.0 mm            |
| P                   | 0.0 mm            |
| H                   | 6.0 mm            |
| Initial Rotation    | 0.00 deg          |
| Initial Orientation | T > C             |
| T > C               | -16.0             |
| > S                 | 0.0               |

**Geometry - Saturation**

|              |          |
|--------------|----------|
| Fat suppr.   | Fat sat. |
| Special sat. | None     |

**System - Miscellaneous**

|                     |                |
|---------------------|----------------|
| Positioning mode    | REF            |
| Table position      | H              |
| Table position      | 0 mm           |
| MSMA                | S - C - T      |
| Sagittal            | R >> L         |
| Coronal             | A >> P         |
| Transversal         | F >> H         |
| Coil Combine Mode   | Sum of Squares |
| Matrix Optimization | Performance    |
| AutoAlign           | Head > Brain   |
| Coil Select Mode    | Off - All      |

**System - Adjustments**

|                          |          |
|--------------------------|----------|
| B0 Shim mode             | Standard |
| B1 Shim mode             | TrueForm |
| Adjust with body coil    | On       |
| Confirm freq. adjustment | Off      |
| Assume Dominant Fat      | Off      |

**System - Adjustments**

|                      |      |
|----------------------|------|
| Assume Silicone      | Off  |
| Adjustment Tolerance | Auto |

**System - Adjust Volume**

|             |                   |
|-------------|-------------------|
| Position    | L0.0 P0.0 H6.0 mm |
| Orientation | T > C-16.0        |
| Rotation    | 0.00 deg          |
| A >> P      | 208 mm            |
| R >> L      | 208 mm            |
| F >> H      | 144 mm            |
| Reset       | Off               |

**System - pTx Volumes**

|              |          |
|--------------|----------|
| B1 Shim mode | TrueForm |
| Excitation   | Standard |

**System - Tx/Rx**

|                     |                |
|---------------------|----------------|
| Frequency 1H        | 123.261582 MHz |
| Correction factor   | 1              |
| Gain                | High           |
| Img. Scale Cor.     | 1.000          |
| Reset               | Off            |
| ? Ref. amplitude 1H | 0.000 V        |

**Physio - Signal1**

|                          |        |
|--------------------------|--------|
| 1st Signal/Mode          | None   |
| TR                       | 800 ms |
| Multi-band accel. factor | 8      |

**BOLD**

|                         |          |
|-------------------------|----------|
| GLM Statistics          | Off      |
| Dynamic t-maps          | Off      |
| Ignore meas. at start   | 0        |
| Ignore after transition | 0        |
| Model transition states | On       |
| Temp. highpass filter   | On       |
| Threshold               | 4.00     |
| Paradigm size           | 3        |
| Meas[1]                 | Baseline |
| Meas[2]                 | Baseline |
| Meas[3]                 | Active   |
| Motion correction       | Off      |
| Spatial filter          | Off      |
| Measurements            | 488      |
| Delay in TR             | 0 ms     |
| Multiple series         | Off      |

**Sequence - Part 1**

|                   |             |
|-------------------|-------------|
| Introduction      | Off         |
| Contrasts         | 1           |
| Flow comp.        | No          |
| Multi-slice mode  | Interleaved |
| Free echo spacing | Off         |
| Echo spacing      | 0.58 ms     |
| Bandwidth         | 2290 Hz/Px  |

**Sequence - Part 2**

|               |             |
|---------------|-------------|
| EPI factor    | 104         |
| Gradient mode | Performance |
| Excitation    | Standard    |
| RF spoiling   | Off         |

**Sequence - Special**

|                          |          |
|--------------------------|----------|
| Excite pulse duration    | 6600 us  |
| Single-band images       | On       |
| MB LeakBlock kernel      | On       |
| MB dual kernel           | Off      |
| MB RF phase scramble     | Off      |
| SENSE1 coil combine      | Off      |
| Invert RO/PE polarity    | On       |
| Disable freq. update     | Off      |
| Force equal slice timing | Off      |
| Online multi-band recon. | Online   |
| FFT scale factor         | 1.00     |
| Physio recording         | DICOM    |
| Triggering scheme        | Standard |

\\Research\\Investigators\\Baker\\Holmes\_Yale\_McLean\_Dec2019\_NOEXPIRATION\\Stroop\_BI1\_AP

TA: 6:58 PM: REF Voxel size: 2.0×2.0×2.0 mmPAT: Off Rel. SNR: 1.00 : epfid

**Properties**

|                                               |                    |
|-----------------------------------------------|--------------------|
| Prio recon                                    | Off                |
| Load images to viewer                         | On                 |
| Inline movie                                  | Off                |
| Auto store images                             | On                 |
| Load images to stamp segments                 | Off                |
| Load images to graphic segments               | Off                |
| Auto open inline display                      | On                 |
| Auto close inline display                     | Off                |
| Start measurement without further preparation | Off                |
| Wait for user to start                        | On                 |
| Start measurements                            | Single measurement |

**Routine**

|                          |                   |
|--------------------------|-------------------|
| Slice group              | 1                 |
| Slices                   | 72                |
| Dist. factor             | 0 %               |
| Position                 | L0.0 P0.0 H6.0 mm |
| Orientation              | T > C-16.0        |
| Phase enc. dir.          | A >> P            |
| AutoAlign                | Head > Brain      |
| Phase oversampling       | 0 %               |
| FoV read                 | 208 mm            |
| FoV phase                | 100.0 %           |
| Slice thickness          | 2.00 mm           |
| TR                       | 800 ms            |
| TE                       | 37.00 ms          |
| Multi-band accel. factor | 8                 |
| Filter                   | None              |
| Coil elements            | HC1-7;NC1,2       |

**Contrast - Common**

|                   |          |
|-------------------|----------|
| TR                | 800 ms   |
| TE                | 37.00 ms |
| MTC               | Off      |
| Magn. preparation | None     |
| Flip angle        | 52 deg   |
| Fat suppr.        | Fat sat. |

**Contrast - Dynamic**

|                 |           |
|-----------------|-----------|
| Averaging mode  | Long term |
| Reconstruction  | Magnitude |
| Measurements    | 510       |
| Delay in TR     | 0 ms      |
| Multiple series | Off       |

**Resolution - Common**

|                       |         |
|-----------------------|---------|
| FoV read              | 208 mm  |
| FoV phase             | 100.0 % |
| Slice thickness       | 2.00 mm |
| Base resolution       | 104     |
| Phase resolution      | 100 %   |
| Phase partial Fourier | Off     |
| Interpolation         | Off     |

**Resolution - iPAT**

|          |      |
|----------|------|
| PAT mode | None |
|----------|------|

**Resolution - Filter Image**

|                  |     |
|------------------|-----|
| Distortion Corr. | Off |
|------------------|-----|

**Resolution - Filter Image**

|                   |     |
|-------------------|-----|
| Prescan Normalize | Off |
|-------------------|-----|

**Resolution - Filter Rawdata**

|                   |     |
|-------------------|-----|
| Raw filter        | Off |
| Elliptical filter | Off |
| Hamming           | Off |

**Geometry - Common**

|                          |                   |
|--------------------------|-------------------|
| Slice group              | 1                 |
| Slices                   | 72                |
| Dist. factor             | 0 %               |
| Position                 | L0.0 P0.0 H6.0 mm |
| Orientation              | T > C-16.0        |
| Phase enc. dir.          | A >> P            |
| FoV read                 | 208 mm            |
| FoV phase                | 100.0 %           |
| Slice thickness          | 2.00 mm           |
| TR                       | 800 ms            |
| Multi-slice mode         | Interleaved       |
| Series                   | Interleaved       |
| Multi-band accel. factor | 8                 |

**Geometry - AutoAlign**

|                     |                   |
|---------------------|-------------------|
| Slice group         | 1                 |
| Position            | L0.0 P0.0 H6.0 mm |
| Orientation         | T > C-16.0        |
| Phase enc. dir.     | A >> P            |
| AutoAlign           | Head > Brain      |
| Initial Position    | L0.0 P0.0 H6.0    |
| L                   | 0.0 mm            |
| P                   | 0.0 mm            |
| H                   | 6.0 mm            |
| Initial Rotation    | 0.00 deg          |
| Initial Orientation | T > C             |
| T > C               | -16.0             |
| > S                 | 0.0               |

**Geometry - Saturation**

|              |          |
|--------------|----------|
| Fat suppr.   | Fat sat. |
| Special sat. | None     |

**System - Miscellaneous**

|                     |                |
|---------------------|----------------|
| Positioning mode    | REF            |
| Table position      | H              |
| Table position      | 0 mm           |
| MSMA                | S - C - T      |
| Sagittal            | R >> L         |
| Coronal             | A >> P         |
| Transversal         | F >> H         |
| Coil Combine Mode   | Sum of Squares |
| Matrix Optimization | Performance    |
| AutoAlign           | Head > Brain   |
| Coil Select Mode    | Off - All      |

**System - Adjustments**

|                          |          |
|--------------------------|----------|
| B0 Shim mode             | Standard |
| B1 Shim mode             | TrueForm |
| Adjust with body coil    | On       |
| Confirm freq. adjustment | Off      |
| Assume Dominant Fat      | Off      |



**System - Adjustments**

|                      |      |
|----------------------|------|
| Assume Silicone      | Off  |
| Adjustment Tolerance | Auto |

**System - Adjust Volume**

|             |                   |
|-------------|-------------------|
| Position    | L0.0 P0.0 H6.0 mm |
| Orientation | T > C-16.0        |
| Rotation    | 0.00 deg          |
| A >> P      | 208 mm            |
| R >> L      | 208 mm            |
| F >> H      | 144 mm            |
| Reset       | Off               |

**System - pTx Volumes**

|              |          |
|--------------|----------|
| B1 Shim mode | TrueForm |
| Excitation   | Standard |

**System - Tx/Rx**

|                     |                |
|---------------------|----------------|
| Frequency 1H        | 123.261582 MHz |
| Correction factor   | 1              |
| Gain                | High           |
| Img. Scale Cor.     | 1.000          |
| Reset               | Off            |
| ? Ref. amplitude 1H | 0.000 V        |

**Physio - Signal1**

|                          |        |
|--------------------------|--------|
| 1st Signal/Mode          | None   |
| TR                       | 800 ms |
| Multi-band accel. factor | 8      |

**BOLD**

|                         |          |
|-------------------------|----------|
| GLM Statistics          | Off      |
| Dynamic t-maps          | Off      |
| Ignore meas. at start   | 0        |
| Ignore after transition | 0        |
| Model transition states | On       |
| Temp. highpass filter   | On       |
| Threshold               | 4.00     |
| Paradigm size           | 3        |
| Meas[1]                 | Baseline |
| Meas[2]                 | Baseline |
| Meas[3]                 | Active   |
| Motion correction       | Off      |
| Spatial filter          | Off      |
| Measurements            | 510      |
| Delay in TR             | 0 ms     |
| Multiple series         | Off      |

**Sequence - Part 1**

|                   |             |
|-------------------|-------------|
| Introduction      | Off         |
| Contrasts         | 1           |
| Flow comp.        | No          |
| Multi-slice mode  | Interleaved |
| Free echo spacing | Off         |
| Echo spacing      | 0.58 ms     |
| Bandwidth         | 2290 Hz/Px  |

**Sequence - Part 2**

|               |             |
|---------------|-------------|
| EPI factor    | 104         |
| Gradient mode | Performance |
| Excitation    | Standard    |
| RF spoiling   | Off         |

**Sequence - Special**

|                          |          |
|--------------------------|----------|
| Excite pulse duration    | 6600 us  |
| Single-band images       | On       |
| MB LeakBlock kernel      | On       |
| MB dual kernel           | Off      |
| MB RF phase scramble     | Off      |
| SENSE1 coil combine      | Off      |
| Invert RO/PE polarity    | Off      |
| Disable freq. update     | Off      |
| Force equal slice timing | Off      |
| Online multi-band recon. | Online   |
| FFT scale factor         | 1.00     |
| Physio recording         | DICOM    |
| Triggering scheme        | Standard |

\\Research\\Investigators\\Baker\\Holmes\_Yale\_McLean\_Dec2019\_NOEXPIRATION\\Stroop\_BI2\_PA

TA: 6:58 PM: REF Voxel size: 2.0×2.0×2.0 mmPAT: Off Rel. SNR: 1.00 : epfid

**Properties**

|                                               |                    |
|-----------------------------------------------|--------------------|
| Prio recon                                    | Off                |
| Load images to viewer                         | On                 |
| Inline movie                                  | Off                |
| Auto store images                             | On                 |
| Load images to stamp segments                 | Off                |
| Load images to graphic segments               | Off                |
| Auto open inline display                      | Off                |
| Auto close inline display                     | Off                |
| Start measurement without further preparation | On                 |
| Wait for user to start                        | On                 |
| Start measurements                            | Single measurement |

**Routine**

|                          |                   |
|--------------------------|-------------------|
| Slice group              | 1                 |
| Slices                   | 72                |
| Dist. factor             | 0 %               |
| Position                 | L0.0 P0.0 H6.0 mm |
| Orientation              | T > C-16.0        |
| Phase enc. dir.          | A >> P            |
| AutoAlign                | Head > Brain      |
| Phase oversampling       | 0 %               |
| FoV read                 | 208 mm            |
| FoV phase                | 100.0 %           |
| Slice thickness          | 2.00 mm           |
| TR                       | 800 ms            |
| TE                       | 37.00 ms          |
| Multi-band accel. factor | 8                 |
| Filter                   | None              |
| Coil elements            | HC1-7;NC1,2       |

**Contrast - Common**

|                   |          |
|-------------------|----------|
| TR                | 800 ms   |
| TE                | 37.00 ms |
| MTC               | Off      |
| Magn. preparation | None     |
| Flip angle        | 52 deg   |
| Fat suppr.        | Fat sat. |

**Contrast - Dynamic**

|                 |           |
|-----------------|-----------|
| Averaging mode  | Long term |
| Reconstruction  | Magnitude |
| Measurements    | 510       |
| Delay in TR     | 0 ms      |
| Multiple series | Off       |

**Resolution - Common**

|                       |         |
|-----------------------|---------|
| FoV read              | 208 mm  |
| FoV phase             | 100.0 % |
| Slice thickness       | 2.00 mm |
| Base resolution       | 104     |
| Phase resolution      | 100 %   |
| Phase partial Fourier | Off     |
| Interpolation         | Off     |

**Resolution - iPAT**

|          |      |
|----------|------|
| PAT mode | None |
|----------|------|

**Resolution - Filter Image**

|                  |     |
|------------------|-----|
| Distortion Corr. | Off |
|------------------|-----|

**Resolution - Filter Image**

|                   |     |
|-------------------|-----|
| Prescan Normalize | Off |
|-------------------|-----|

**Resolution - Filter Rawdata**

|                   |     |
|-------------------|-----|
| Raw filter        | Off |
| Elliptical filter | Off |
| Hamming           | Off |

**Geometry - Common**

|                          |                   |
|--------------------------|-------------------|
| Slice group              | 1                 |
| Slices                   | 72                |
| Dist. factor             | 0 %               |
| Position                 | L0.0 P0.0 H6.0 mm |
| Orientation              | T > C-16.0        |
| Phase enc. dir.          | A >> P            |
| FoV read                 | 208 mm            |
| FoV phase                | 100.0 %           |
| Slice thickness          | 2.00 mm           |
| TR                       | 800 ms            |
| Multi-slice mode         | Interleaved       |
| Series                   | Interleaved       |
| Multi-band accel. factor | 8                 |

**Geometry - AutoAlign**

|                     |                   |
|---------------------|-------------------|
| Slice group         | 1                 |
| Position            | L0.0 P0.0 H6.0 mm |
| Orientation         | T > C-16.0        |
| Phase enc. dir.     | A >> P            |
| AutoAlign           | Head > Brain      |
| Initial Position    | L0.0 P0.0 H6.0    |
| L                   | 0.0 mm            |
| P                   | 0.0 mm            |
| H                   | 6.0 mm            |
| Initial Rotation    | 0.00 deg          |
| Initial Orientation | T > C             |
| T > C               | -16.0             |
| > S                 | 0.0               |

**Geometry - Saturation**

|              |          |
|--------------|----------|
| Fat suppr.   | Fat sat. |
| Special sat. | None     |

**System - Miscellaneous**

|                     |                |
|---------------------|----------------|
| Positioning mode    | REF            |
| Table position      | H              |
| Table position      | 0 mm           |
| MSMA                | S - C - T      |
| Sagittal            | R >> L         |
| Coronal             | A >> P         |
| Transversal         | F >> H         |
| Coil Combine Mode   | Sum of Squares |
| Matrix Optimization | Performance    |
| AutoAlign           | Head > Brain   |
| Coil Select Mode    | Off - All      |

**System - Adjustments**

|                          |          |
|--------------------------|----------|
| B0 Shim mode             | Standard |
| B1 Shim mode             | TrueForm |
| Adjust with body coil    | On       |
| Confirm freq. adjustment | Off      |
| Assume Dominant Fat      | Off      |

**System - Adjustments**

|                      |      |
|----------------------|------|
| Assume Silicone      | Off  |
| Adjustment Tolerance | Auto |

**System - Adjust Volume**

|             |                   |
|-------------|-------------------|
| Position    | L0.0 P0.0 H6.0 mm |
| Orientation | T > C-16.0        |
| Rotation    | 0.00 deg          |
| A >> P      | 208 mm            |
| R >> L      | 208 mm            |
| F >> H      | 144 mm            |
| Reset       | Off               |

**System - pTx Volumes**

|              |          |
|--------------|----------|
| B1 Shim mode | TrueForm |
| Excitation   | Standard |

**System - Tx/Rx**

|                     |                |
|---------------------|----------------|
| Frequency 1H        | 123.261582 MHz |
| Correction factor   | 1              |
| Gain                | High           |
| Img. Scale Cor.     | 1.000          |
| Reset               | Off            |
| ? Ref. amplitude 1H | 0.000 V        |

**Physio - Signal1**

|                          |        |
|--------------------------|--------|
| 1st Signal/Mode          | None   |
| TR                       | 800 ms |
| Multi-band accel. factor | 8      |

**BOLD**

|                         |          |
|-------------------------|----------|
| GLM Statistics          | Off      |
| Dynamic t-maps          | Off      |
| Ignore meas. at start   | 0        |
| Ignore after transition | 0        |
| Model transition states | On       |
| Temp. highpass filter   | On       |
| Threshold               | 4.00     |
| Paradigm size           | 3        |
| Meas[1]                 | Baseline |
| Meas[2]                 | Baseline |
| Meas[3]                 | Active   |
| Motion correction       | Off      |
| Spatial filter          | Off      |
| Measurements            | 510      |
| Delay in TR             | 0 ms     |
| Multiple series         | Off      |

**Sequence - Part 1**

|                   |             |
|-------------------|-------------|
| Introduction      | Off         |
| Contrasts         | 1           |
| Flow comp.        | No          |
| Multi-slice mode  | Interleaved |
| Free echo spacing | Off         |
| Echo spacing      | 0.58 ms     |
| Bandwidth         | 2290 Hz/Px  |

**Sequence - Part 2**

|               |             |
|---------------|-------------|
| EPI factor    | 104         |
| Gradient mode | Performance |
| Excitation    | Standard    |
| RF spoiling   | Off         |

**Sequence - Special**

|                          |          |
|--------------------------|----------|
| Excite pulse duration    | 6600 us  |
| Single-band images       | On       |
| MB LeakBlock kernel      | On       |
| MB dual kernel           | Off      |
| MB RF phase scramble     | Off      |
| SENSE1 coil combine      | Off      |
| Invert RO/PE polarity    | On       |
| Disable freq. update     | Off      |
| Force equal slice timing | Off      |
| Online multi-band recon. | Online   |
| FFT scale factor         | 1.00     |
| Physio recording         | DICOM    |
| Triggering scheme        | Standard |

\\Research\\Investigators\\Baker\\Holmes\_Yale\_McLean\_Dec2019\_NOEXPIRATION\\Hammer\_BI1\_AP

TA: 6:44 PM: REF Voxel size: 2.0×2.0×2.0 mmPAT: Off Rel. SNR: 1.00 : epfd

**Properties**

|                                               |                    |
|-----------------------------------------------|--------------------|
| Prio recon                                    | Off                |
| Load images to viewer                         | On                 |
| Inline movie                                  | Off                |
| Auto store images                             | On                 |
| Load images to stamp segments                 | Off                |
| Load images to graphic segments               | Off                |
| Auto open inline display                      | On                 |
| Auto close inline display                     | Off                |
| Start measurement without further preparation | Off                |
| Wait for user to start                        | On                 |
| Start measurements                            | Single measurement |

**Routine**

|                          |                   |
|--------------------------|-------------------|
| Slice group              | 1                 |
| Slices                   | 72                |
| Dist. factor             | 0 %               |
| Position                 | L0.0 P0.0 H6.0 mm |
| Orientation              | T > C-16.0        |
| Phase enc. dir.          | A >> P            |
| AutoAlign                | Head > Brain      |
| Phase oversampling       | 0 %               |
| FoV read                 | 208 mm            |
| FoV phase                | 100.0 %           |
| Slice thickness          | 2.00 mm           |
| TR                       | 800 ms            |
| TE                       | 37.00 ms          |
| Multi-band accel. factor | 8                 |
| Filter                   | None              |
| Coil elements            | HC1-7;NC1,2       |

**Contrast - Common**

|                   |          |
|-------------------|----------|
| TR                | 800 ms   |
| TE                | 37.00 ms |
| MTC               | Off      |
| Magn. preparation | None     |
| Flip angle        | 52 deg   |
| Fat suppr.        | Fat sat. |

**Contrast - Dynamic**

|                 |           |
|-----------------|-----------|
| Averaging mode  | Long term |
| Reconstruction  | Magnitude |
| Measurements    | 493       |
| Delay in TR     | 0 ms      |
| Multiple series | Off       |

**Resolution - Common**

|                       |         |
|-----------------------|---------|
| FoV read              | 208 mm  |
| FoV phase             | 100.0 % |
| Slice thickness       | 2.00 mm |
| Base resolution       | 104     |
| Phase resolution      | 100 %   |
| Phase partial Fourier | Off     |
| Interpolation         | Off     |

**Resolution - iPAT**

|          |      |
|----------|------|
| PAT mode | None |
|----------|------|

**Resolution - Filter Image**

|                  |     |
|------------------|-----|
| Distortion Corr. | Off |
|------------------|-----|

**Resolution - Filter Image**

|                   |     |
|-------------------|-----|
| Prescan Normalize | Off |
|-------------------|-----|

**Resolution - Filter Rawdata**

|                   |     |
|-------------------|-----|
| Raw filter        | Off |
| Elliptical filter | Off |
| Hamming           | Off |

**Geometry - Common**

|                          |                   |
|--------------------------|-------------------|
| Slice group              | 1                 |
| Slices                   | 72                |
| Dist. factor             | 0 %               |
| Position                 | L0.0 P0.0 H6.0 mm |
| Orientation              | T > C-16.0        |
| Phase enc. dir.          | A >> P            |
| FoV read                 | 208 mm            |
| FoV phase                | 100.0 %           |
| Slice thickness          | 2.00 mm           |
| TR                       | 800 ms            |
| Multi-slice mode         | Interleaved       |
| Series                   | Interleaved       |
| Multi-band accel. factor | 8                 |

**Geometry - AutoAlign**

|                     |                   |
|---------------------|-------------------|
| Slice group         | 1                 |
| Position            | L0.0 P0.0 H6.0 mm |
| Orientation         | T > C-16.0        |
| Phase enc. dir.     | A >> P            |
| AutoAlign           | Head > Brain      |
| Initial Position    | L0.0 P0.0 H6.0    |
| L                   | 0.0 mm            |
| P                   | 0.0 mm            |
| H                   | 6.0 mm            |
| Initial Rotation    | 0.00 deg          |
| Initial Orientation | T > C             |
| T > C               | -16.0             |
| > S                 | 0.0               |

**Geometry - Saturation**

|              |          |
|--------------|----------|
| Fat suppr.   | Fat sat. |
| Special sat. | None     |

**System - Miscellaneous**

|                     |                |
|---------------------|----------------|
| Positioning mode    | REF            |
| Table position      | H              |
| Table position      | 0 mm           |
| MSMA                | S - C - T      |
| Sagittal            | R >> L         |
| Coronal             | A >> P         |
| Transversal         | F >> H         |
| Coil Combine Mode   | Sum of Squares |
| Matrix Optimization | Performance    |
| AutoAlign           | Head > Brain   |
| Coil Select Mode    | Off - All      |

**System - Adjustments**

|                          |          |
|--------------------------|----------|
| B0 Shim mode             | Standard |
| B1 Shim mode             | TrueForm |
| Adjust with body coil    | On       |
| Confirm freq. adjustment | Off      |
| Assume Dominant Fat      | Off      |

**System - Adjustments**

|                      |      |
|----------------------|------|
| Assume Silicone      | Off  |
| Adjustment Tolerance | Auto |

**System - Adjust Volume**

|             |                   |
|-------------|-------------------|
| Position    | L0.0 P0.0 H6.0 mm |
| Orientation | T > C-16.0        |
| Rotation    | 0.00 deg          |
| A >> P      | 208 mm            |
| R >> L      | 208 mm            |
| F >> H      | 144 mm            |
| Reset       | Off               |

**System - pTx Volumes**

|              |          |
|--------------|----------|
| B1 Shim mode | TrueForm |
| Excitation   | Standard |

**System - Tx/Rx**

|                     |                |
|---------------------|----------------|
| Frequency 1H        | 123.261582 MHz |
| Correction factor   | 1              |
| Gain                | High           |
| Img. Scale Cor.     | 1.000          |
| Reset               | Off            |
| ? Ref. amplitude 1H | 0.000 V        |

**Physio - Signal1**

|                          |        |
|--------------------------|--------|
| 1st Signal/Mode          | None   |
| TR                       | 800 ms |
| Multi-band accel. factor | 8      |

**BOLD**

|                         |          |
|-------------------------|----------|
| GLM Statistics          | Off      |
| Dynamic t-maps          | Off      |
| Ignore meas. at start   | 0        |
| Ignore after transition | 0        |
| Model transition states | On       |
| Temp. highpass filter   | On       |
| Threshold               | 4.00     |
| Paradigm size           | 3        |
| Meas[1]                 | Baseline |
| Meas[2]                 | Baseline |
| Meas[3]                 | Active   |
| Motion correction       | Off      |
| Spatial filter          | Off      |
| Measurements            | 493      |
| Delay in TR             | 0 ms     |
| Multiple series         | Off      |

**Sequence - Part 1**

|                   |             |
|-------------------|-------------|
| Introduction      | Off         |
| Contrasts         | 1           |
| Flow comp.        | No          |
| Multi-slice mode  | Interleaved |
| Free echo spacing | Off         |
| Echo spacing      | 0.58 ms     |
| Bandwidth         | 2290 Hz/Px  |

**Sequence - Part 2**

|               |             |
|---------------|-------------|
| EPI factor    | 104         |
| Gradient mode | Performance |
| Excitation    | Standard    |
| RF spoiling   | Off         |

**Sequence - Special**

|                          |          |
|--------------------------|----------|
| Excite pulse duration    | 6600 us  |
| Single-band images       | On       |
| MB LeakBlock kernel      | On       |
| MB dual kernel           | Off      |
| MB RF phase scramble     | Off      |
| SENSE1 coil combine      | Off      |
| Invert RO/PE polarity    | Off      |
| Disable freq. update     | Off      |
| Force equal slice timing | Off      |
| Online multi-band recon. | Online   |
| FFT scale factor         | 1.00     |
| Physio recording         | DICOM    |
| Triggering scheme        | Standard |

\\Research\\Investigators\\Baker\\Holmes\_Yale\_McLean\_Dec2019\_NOEXPIRATION\\rfMRI\_REST\_AP

TA: 6:40 PM: REF Voxel size: 2.0×2.0×2.0 mmPAT: Off Rel. SNR: 1.00 : epfid

**Properties**

|                                               |                    |
|-----------------------------------------------|--------------------|
| Prio recon                                    | Off                |
| Load images to viewer                         | On                 |
| Inline movie                                  | Off                |
| Auto store images                             | On                 |
| Load images to stamp segments                 | Off                |
| Load images to graphic segments               | Off                |
| Auto open inline display                      | On                 |
| Auto close inline display                     | Off                |
| Start measurement without further preparation | Off                |
| Wait for user to start                        | On                 |
| Start measurements                            | Single measurement |

**Routine**

|                          |                   |
|--------------------------|-------------------|
| Slice group              | 1                 |
| Slices                   | 72                |
| Dist. factor             | 0 %               |
| Position                 | L0.0 P0.0 H6.0 mm |
| Orientation              | T > C-16.0        |
| Phase enc. dir.          | A >> P            |
| AutoAlign                | Head > Brain      |
| Phase oversampling       | 0 %               |
| FoV read                 | 208 mm            |
| FoV phase                | 100.0 %           |
| Slice thickness          | 2.00 mm           |
| TR                       | 800 ms            |
| TE                       | 37.00 ms          |
| Multi-band accel. factor | 8                 |
| Filter                   | None              |
| Coil elements            | HC1-7;NC1,2       |

**Contrast - Common**

|                   |          |
|-------------------|----------|
| TR                | 800 ms   |
| TE                | 37.00 ms |
| MTC               | Off      |
| Magn. preparation | None     |
| Flip angle        | 52 deg   |
| Fat suppr.        | Fat sat. |

**Contrast - Dynamic**

|                 |           |
|-----------------|-----------|
| Averaging mode  | Long term |
| Reconstruction  | Magnitude |
| Measurements    | 488       |
| Delay in TR     | 0 ms      |
| Multiple series | Off       |

**Resolution - Common**

|                       |         |
|-----------------------|---------|
| FoV read              | 208 mm  |
| FoV phase             | 100.0 % |
| Slice thickness       | 2.00 mm |
| Base resolution       | 104     |
| Phase resolution      | 100 %   |
| Phase partial Fourier | Off     |
| Interpolation         | Off     |

**Resolution - iPAT**

|          |      |
|----------|------|
| PAT mode | None |
|----------|------|

**Resolution - Filter Image**

|                  |     |
|------------------|-----|
| Distortion Corr. | Off |
|------------------|-----|

**Resolution - Filter Image**

|                   |     |
|-------------------|-----|
| Prescan Normalize | Off |
|-------------------|-----|

**Resolution - Filter Rawdata**

|                   |     |
|-------------------|-----|
| Raw filter        | Off |
| Elliptical filter | Off |
| Hamming           | Off |

**Geometry - Common**

|                          |                   |
|--------------------------|-------------------|
| Slice group              | 1                 |
| Slices                   | 72                |
| Dist. factor             | 0 %               |
| Position                 | L0.0 P0.0 H6.0 mm |
| Orientation              | T > C-16.0        |
| Phase enc. dir.          | A >> P            |
| FoV read                 | 208 mm            |
| FoV phase                | 100.0 %           |
| Slice thickness          | 2.00 mm           |
| TR                       | 800 ms            |
| Multi-slice mode         | Interleaved       |
| Series                   | Interleaved       |
| Multi-band accel. factor | 8                 |

**Geometry - AutoAlign**

|                     |                   |
|---------------------|-------------------|
| Slice group         | 1                 |
| Position            | L0.0 P0.0 H6.0 mm |
| Orientation         | T > C-16.0        |
| Phase enc. dir.     | A >> P            |
| AutoAlign           | Head > Brain      |
| Initial Position    | L0.0 P0.0 H6.0    |
| L                   | 0.0 mm            |
| P                   | 0.0 mm            |
| H                   | 6.0 mm            |
| Initial Rotation    | 0.00 deg          |
| Initial Orientation | T > C             |
| T > C               | -16.0             |
| > S                 | 0.0               |

**Geometry - Saturation**

|              |          |
|--------------|----------|
| Fat suppr.   | Fat sat. |
| Special sat. | None     |

**System - Miscellaneous**

|                     |                |
|---------------------|----------------|
| Positioning mode    | REF            |
| Table position      | H              |
| Table position      | 0 mm           |
| MSMA                | S - C - T      |
| Sagittal            | R >> L         |
| Coronal             | A >> P         |
| Transversal         | F >> H         |
| Coil Combine Mode   | Sum of Squares |
| Matrix Optimization | Performance    |
| AutoAlign           | Head > Brain   |
| Coil Select Mode    | Off - All      |

**System - Adjustments**

|                          |          |
|--------------------------|----------|
| B0 Shim mode             | Standard |
| B1 Shim mode             | TrueForm |
| Adjust with body coil    | On       |
| Confirm freq. adjustment | Off      |
| Assume Dominant Fat      | Off      |

**System - Adjustments**

|                      |      |
|----------------------|------|
| Assume Silicone      | Off  |
| Adjustment Tolerance | Auto |

**System - Adjust Volume**

|             |                   |
|-------------|-------------------|
| Position    | L0.0 P0.0 H6.0 mm |
| Orientation | T > C-16.0        |
| Rotation    | 0.00 deg          |
| A >> P      | 208 mm            |
| R >> L      | 208 mm            |
| F >> H      | 144 mm            |
| Reset       | Off               |

**System - pTx Volumes**

|              |          |
|--------------|----------|
| B1 Shim mode | TrueForm |
| Excitation   | Standard |

**System - Tx/Rx**

|                     |                |
|---------------------|----------------|
| Frequency 1H        | 123.261582 MHz |
| Correction factor   | 1              |
| Gain                | High           |
| Img. Scale Cor.     | 1.000          |
| Reset               | Off            |
| ? Ref. amplitude 1H | 0.000 V        |

**Physio - Signal1**

|                          |        |
|--------------------------|--------|
| 1st Signal/Mode          | None   |
| TR                       | 800 ms |
| Multi-band accel. factor | 8      |

**BOLD**

|                         |          |
|-------------------------|----------|
| GLM Statistics          | Off      |
| Dynamic t-maps          | Off      |
| Ignore meas. at start   | 0        |
| Ignore after transition | 0        |
| Model transition states | On       |
| Temp. highpass filter   | On       |
| Threshold               | 4.00     |
| Paradigm size           | 3        |
| Meas[1]                 | Baseline |
| Meas[2]                 | Baseline |
| Meas[3]                 | Active   |
| Motion correction       | Off      |
| Spatial filter          | Off      |
| Measurements            | 488      |
| Delay in TR             | 0 ms     |
| Multiple series         | Off      |

**Sequence - Part 1**

|                   |             |
|-------------------|-------------|
| Introduction      | Off         |
| Contrasts         | 1           |
| Flow comp.        | No          |
| Multi-slice mode  | Interleaved |
| Free echo spacing | Off         |
| Echo spacing      | 0.58 ms     |
| Bandwidth         | 2290 Hz/Px  |

**Sequence - Part 2**

|               |             |
|---------------|-------------|
| EPI factor    | 104         |
| Gradient mode | Performance |
| Excitation    | Standard    |
| RF spoiling   | Off         |

**Sequence - Special**

|                          |          |
|--------------------------|----------|
| Excite pulse duration    | 6600 us  |
| Single-band images       | On       |
| MB LeakBlock kernel      | On       |
| MB dual kernel           | Off      |
| MB RF phase scramble     | Off      |
| SENSE1 coil combine      | Off      |
| Invert RO/PE polarity    | Off      |
| Disable freq. update     | Off      |
| Force equal slice timing | Off      |
| Online multi-band recon. | Online   |
| FFT scale factor         | 1.00     |
| Physio recording         | DICOM    |
| Triggering scheme        | Standard |

\\Research\\Investigators\\Baker\\Holmes\_Yale\_McLean\_Dec2019\_NOEXPIRATION\\rfMRI\_REST\_PA

TA: 6:40 PM: REF Voxel size: 2.0×2.0×2.0 mmPAT: Off Rel. SNR: 1.00 : epfid

**Properties**

|                                               |                    |
|-----------------------------------------------|--------------------|
| Prio recon                                    | Off                |
| Load images to viewer                         | On                 |
| Inline movie                                  | Off                |
| Auto store images                             | On                 |
| Load images to stamp segments                 | Off                |
| Load images to graphic segments               | Off                |
| Auto open inline display                      | Off                |
| Auto close inline display                     | Off                |
| Start measurement without further preparation | On                 |
| Wait for user to start                        | On                 |
| Start measurements                            | Single measurement |

**Routine**

|                          |                   |
|--------------------------|-------------------|
| Slice group              | 1                 |
| Slices                   | 72                |
| Dist. factor             | 0 %               |
| Position                 | L0.0 P0.0 H6.0 mm |
| Orientation              | T > C-16.0        |
| Phase enc. dir.          | A >> P            |
| AutoAlign                | Head > Brain      |
| Phase oversampling       | 0 %               |
| FoV read                 | 208 mm            |
| FoV phase                | 100.0 %           |
| Slice thickness          | 2.00 mm           |
| TR                       | 800 ms            |
| TE                       | 37.00 ms          |
| Multi-band accel. factor | 8                 |
| Filter                   | None              |
| Coil elements            | HC1-7;NC1,2       |

**Contrast - Common**

|                   |          |
|-------------------|----------|
| TR                | 800 ms   |
| TE                | 37.00 ms |
| MTC               | Off      |
| Magn. preparation | None     |
| Flip angle        | 52 deg   |
| Fat suppr.        | Fat sat. |

**Contrast - Dynamic**

|                 |           |
|-----------------|-----------|
| Averaging mode  | Long term |
| Reconstruction  | Magnitude |
| Measurements    | 488       |
| Delay in TR     | 0 ms      |
| Multiple series | Off       |

**Resolution - Common**

|                       |         |
|-----------------------|---------|
| FoV read              | 208 mm  |
| FoV phase             | 100.0 % |
| Slice thickness       | 2.00 mm |
| Base resolution       | 104     |
| Phase resolution      | 100 %   |
| Phase partial Fourier | Off     |
| Interpolation         | Off     |

**Resolution - iPAT**

|          |      |
|----------|------|
| PAT mode | None |
|----------|------|

**Resolution - Filter Image**

|                  |     |
|------------------|-----|
| Distortion Corr. | Off |
|------------------|-----|

**Resolution - Filter Image**

|                   |     |
|-------------------|-----|
| Prescan Normalize | Off |
|-------------------|-----|

**Resolution - Filter Rawdata**

|                   |     |
|-------------------|-----|
| Raw filter        | Off |
| Elliptical filter | Off |
| Hamming           | Off |

**Geometry - Common**

|                          |                   |
|--------------------------|-------------------|
| Slice group              | 1                 |
| Slices                   | 72                |
| Dist. factor             | 0 %               |
| Position                 | L0.0 P0.0 H6.0 mm |
| Orientation              | T > C-16.0        |
| Phase enc. dir.          | A >> P            |
| FoV read                 | 208 mm            |
| FoV phase                | 100.0 %           |
| Slice thickness          | 2.00 mm           |
| TR                       | 800 ms            |
| Multi-slice mode         | Interleaved       |
| Series                   | Interleaved       |
| Multi-band accel. factor | 8                 |

**Geometry - AutoAlign**

|                     |                   |
|---------------------|-------------------|
| Slice group         | 1                 |
| Position            | L0.0 P0.0 H6.0 mm |
| Orientation         | T > C-16.0        |
| Phase enc. dir.     | A >> P            |
| AutoAlign           | Head > Brain      |
| Initial Position    | L0.0 P0.0 H6.0    |
| L                   | 0.0 mm            |
| P                   | 0.0 mm            |
| H                   | 6.0 mm            |
| Initial Rotation    | 0.00 deg          |
| Initial Orientation | T > C             |
| T > C               | -16.0             |
| > S                 | 0.0               |

**Geometry - Saturation**

|              |          |
|--------------|----------|
| Fat suppr.   | Fat sat. |
| Special sat. | None     |

**System - Miscellaneous**

|                     |                |
|---------------------|----------------|
| Positioning mode    | REF            |
| Table position      | H              |
| Table position      | 0 mm           |
| MSMA                | S - C - T      |
| Sagittal            | R >> L         |
| Coronal             | A >> P         |
| Transversal         | F >> H         |
| Coil Combine Mode   | Sum of Squares |
| Matrix Optimization | Performance    |
| AutoAlign           | Head > Brain   |
| Coil Select Mode    | Off - All      |

**System - Adjustments**

|                          |          |
|--------------------------|----------|
| B0 Shim mode             | Standard |
| B1 Shim mode             | TrueForm |
| Adjust with body coil    | On       |
| Confirm freq. adjustment | Off      |
| Assume Dominant Fat      | Off      |



**System - Adjustments**

|                      |      |
|----------------------|------|
| Assume Silicone      | Off  |
| Adjustment Tolerance | Auto |

**System - Adjust Volume**

|             |                   |
|-------------|-------------------|
| Position    | L0.0 P0.0 H6.0 mm |
| Orientation | T > C-16.0        |
| Rotation    | 0.00 deg          |
| A >> P      | 208 mm            |
| R >> L      | 208 mm            |
| F >> H      | 144 mm            |
| Reset       | Off               |

**System - pTx Volumes**

|              |          |
|--------------|----------|
| B1 Shim mode | TrueForm |
| Excitation   | Standard |

**System - Tx/Rx**

|                     |                |
|---------------------|----------------|
| Frequency 1H        | 123.261582 MHz |
| Correction factor   | 1              |
| Gain                | High           |
| Img. Scale Cor.     | 1.000          |
| Reset               | Off            |
| ? Ref. amplitude 1H | 0.000 V        |

**Physio - Signal1**

|                          |        |
|--------------------------|--------|
| 1st Signal/Mode          | None   |
| TR                       | 800 ms |
| Multi-band accel. factor | 8      |

**BOLD**

|                         |          |
|-------------------------|----------|
| GLM Statistics          | Off      |
| Dynamic t-maps          | Off      |
| Ignore meas. at start   | 0        |
| Ignore after transition | 0        |
| Model transition states | On       |
| Temp. highpass filter   | On       |
| Threshold               | 4.00     |
| Paradigm size           | 3        |
| Meas[1]                 | Baseline |
| Meas[2]                 | Baseline |
| Meas[3]                 | Active   |
| Motion correction       | Off      |
| Spatial filter          | Off      |
| Measurements            | 488      |
| Delay in TR             | 0 ms     |
| Multiple series         | Off      |

**Sequence - Part 1**

|                   |             |
|-------------------|-------------|
| Introduction      | Off         |
| Contrasts         | 1           |
| Flow comp.        | No          |
| Multi-slice mode  | Interleaved |
| Free echo spacing | Off         |
| Echo spacing      | 0.58 ms     |
| Bandwidth         | 2290 Hz/Px  |

**Sequence - Part 2**

|               |             |
|---------------|-------------|
| EPI factor    | 104         |
| Gradient mode | Performance |
| Excitation    | Standard    |
| RF spoiling   | Off         |

**Sequence - Special**

|                          |          |
|--------------------------|----------|
| Excite pulse duration    | 6600 us  |
| Single-band images       | On       |
| MB LeakBlock kernel      | On       |
| MB dual kernel           | Off      |
| MB RF phase scramble     | Off      |
| SENSE1 coil combine      | Off      |
| Invert RO/PE polarity    | On       |
| Disable freq. update     | Off      |
| Force equal slice timing | Off      |
| Online multi-band recon. | Online   |
| FFT scale factor         | 1.00     |
| Physio recording         | DICOM    |
| Triggering scheme        | Standard |

\\Research\\Investigators\\Baker\\Holmes\_Yale\_McLean\_Dec2019\_NOEXPIRATION\\T1\_MEMPRAGE\_6  
4ch

TA: 6:02 PM: REF Voxel size: 1.0×1.0×1.0 mmPAT: 2 Rel. SNR: 1.00 : tfl\_me

### Properties

|                                               |                    |
|-----------------------------------------------|--------------------|
| Prio recon                                    | Off                |
| Load images to viewer                         | On                 |
| Inline movie                                  | Off                |
| Auto store images                             | On                 |
| Load images to stamp segments                 | Off                |
| Load images to graphic segments               | Off                |
| Auto open inline display                      | Off                |
| Auto close inline display                     | Off                |
| Start measurement without further preparation | Off                |
| Wait for user to start                        | On                 |
| Start measurements                            | Single measurement |

### Routine

|                    |                               |
|--------------------|-------------------------------|
| Slab group         | 1                             |
| Slabs              | 1                             |
| Dist. factor       | 50 %                          |
| Position           | R2.2 P1.7 F31.8 mm            |
| Orientation        | Sagittal                      |
| Phase enc. dir.    | A >> P                        |
| AutoAlign          | Head > Brain                  |
| Phase oversampling | 0 %                           |
| Slice oversampling | 0.0 %                         |
| Slices per slab    | 176                           |
| FoV read           | 256 mm                        |
| FoV phase          | 100.0 %                       |
| Slice thickness    | 1.00 mm                       |
| TR                 | 2530.0 ms                     |
| TE 1               | 1.69 ms                       |
| TE 2               | 3.55 ms                       |
| TE 3               | 5.41 ms                       |
| TE 4               | 7.27 ms                       |
| Averages           | 1                             |
| Concatenations     | 1                             |
| Filter             | Raw filter, Prescan Normalize |
| Coil elements      | HC1-7                         |

### Contrast - Common

|                   |             |
|-------------------|-------------|
| TR                | 2530.0 ms   |
| TE 1              | 1.69 ms     |
| TE 2              | 3.55 ms     |
| TE 3              | 5.41 ms     |
| TE 4              | 7.27 ms     |
| Magn. preparation | Non-sel. IR |
| T1                | 1100 ms     |
| Flip angle        | 7.0 deg     |
| Fat suppr.        | None        |
| Water suppr.      | None        |

### Contrast - Dynamic

|                 |                  |
|-----------------|------------------|
| Averages        | 1                |
| Averaging mode  | Long term        |
| Reconstruction  | Magnitude        |
| Measurements    | 1                |
| Multiple series | Each measurement |

### Resolution - Common

|          |        |
|----------|--------|
| FoV read | 256 mm |
|----------|--------|

### Resolution - Common

|                       |         |
|-----------------------|---------|
| FoV phase             | 100.0 % |
| Slice thickness       | 1.00 mm |
| Base resolution       | 256     |
| Phase resolution      | 100 %   |
| Slice resolution      | 100 %   |
| Phase partial Fourier | Off     |
| Slice partial Fourier | Off     |
| Interpolation         | Off     |

### Resolution - iPAT

|                     |            |
|---------------------|------------|
| PAT mode            | GRAPPA     |
| Accel. factor PE    | 2          |
| Ref. lines PE       | 32         |
| Accel. factor 3D    | 1          |
| Reference scan mode | Integrated |

### Resolution - Filter Image

|                   |     |
|-------------------|-----|
| Image Filter      | Off |
| Distortion Corr.  | Off |
| Prescan Normalize | On  |
| Unfiltered images | Off |
| Normalize         | Off |
| B1 filter         | Off |

### Resolution - Filter Rawdata

|                   |     |
|-------------------|-----|
| Raw filter        | On  |
| Elliptical filter | Off |

### Geometry - Common

|                    |                    |
|--------------------|--------------------|
| Slab group         | 1                  |
| Slabs              | 1                  |
| Dist. factor       | 50 %               |
| Position           | R2.2 P1.7 F31.8 mm |
| Orientation        | Sagittal           |
| Phase enc. dir.    | A >> P             |
| Slice oversampling | 0.0 %              |
| Slices per slab    | 176                |
| FoV read           | 256 mm             |
| FoV phase          | 100.0 %            |
| Slice thickness    | 1.00 mm            |
| TR                 | 2530.0 ms          |
| Multi-slice mode   | Single shot        |
| Series             | Interleaved        |
| Concatenations     | 1                  |

### Geometry - AutoAlign

|                     |                    |
|---------------------|--------------------|
| Slab group          | 1                  |
| Position            | R2.2 P1.7 F31.8 mm |
| Orientation         | Sagittal           |
| Phase enc. dir.     | A >> P             |
| AutoAlign           | Head > Brain       |
| Initial Position    | R2.2 P1.7 F31.8    |
| R                   | 2.2 mm             |
| P                   | 1.7 mm             |
| F                   | 31.8 mm            |
| Initial Rotation    | 0.00 deg           |
| Initial Orientation | Sagittal           |

### Geometry - Navigator

**System - Miscellaneous**

|                     |                  |
|---------------------|------------------|
| Positioning mode    | REF              |
| Table position      | H                |
| Table position      | 0 mm             |
| MSMA                | S - C - T        |
| Sagittal            | R >> L           |
| Coronal             | A >> P           |
| Transversal         | F >> H           |
| Coil Combine Mode   | Adaptive Combine |
| Save uncombined     | Off              |
| Matrix Optimization | Off              |
| AutoAlign           | Head > Brain     |
| Coil Select Mode    | Default          |

**System - Adjustments**

|                          |          |
|--------------------------|----------|
| B0 Shim mode             | Standard |
| B1 Shim mode             | TrueForm |
| Adjust with body coil    | On       |
| Confirm freq. adjustment | Off      |
| Assume Dominant Fat      | Off      |
| Assume Silicone          | Off      |
| Adjustment Tolerance     | Auto     |

**System - Adjust Volume**

|             |                    |
|-------------|--------------------|
| Position    | R2.2 P1.7 F31.8 mm |
| Orientation | Sagittal           |
| Rotation    | 0.00 deg           |
| A >> P      | 256 mm             |
| F >> H      | 256 mm             |
| R >> L      | 176 mm             |
| Reset       | Off                |

**System - pTx Volumes**

|              |          |
|--------------|----------|
| B1 Shim mode | TrueForm |
| Excitation   | Non-sel. |

**System - Tx/Rx**

|                     |                |
|---------------------|----------------|
| Frequency 1H        | 123.261582 MHz |
| Correction factor   | 1              |
| Gain                | Low            |
| Img. Scale Cor.     | 1.000          |
| Reset               | Off            |
| ? Ref. amplitude 1H | 0.000 V        |

**Physio - Signal1**

|                 |           |
|-----------------|-----------|
| 1st Signal/Mode | None      |
| TR              | 2530.0 ms |
| Concatenations  | 1         |

**Physio - Cardiac**

|                   |             |
|-------------------|-------------|
| Magn. preparation | Non-sel. IR |
| TI                | 1100 ms     |
| Fat suppr.        | None        |
| Dark blood        | Off         |
| FoV read          | 256 mm      |
| FoV phase         | 100.0 %     |
| Phase resolution  | 100 %       |

**Physio - PACE**

|                |     |
|----------------|-----|
| Resp. control  | Off |
| Concatenations | 1   |

**Inline - Common**

|          |     |
|----------|-----|
| Subtract | Off |
|----------|-----|

**Inline - Common**

|                      |     |
|----------------------|-----|
| Measurements         | 1   |
| StdDev               | Off |
| Save original images | On  |

**Inline - MIP**

|                      |     |
|----------------------|-----|
| MIP-Sag              | Off |
| MIP-Cor              | Off |
| MIP-Tra              | Off |
| MIP-Time             | Off |
| Save original images | On  |

**Inline - Composing**

|                  |     |
|------------------|-----|
| Distortion Corr. | Off |
|------------------|-----|

**Sequence - Part 1**

|                     |             |
|---------------------|-------------|
| Introduction        | Off         |
| Dimension           | 3D          |
| Elliptical scanning | Off         |
| Reordering          | Linear      |
| Asymmetric echo     | Off         |
| Contrasts           | 4           |
| Flow comp. 1        | No          |
| Multi-slice mode    | Single shot |
| Echo spacing        | 9.8 ms      |
| Bandwidth 1         | 650 Hz/Px   |
| Bandwidth 2         | 650 Hz/Px   |
| Bandwidth 3         | 650 Hz/Px   |
| Bandwidth 4         | 650 Hz/Px   |

**Sequence - Part 2**

|                         |          |
|-------------------------|----------|
| RF pulse type           | Fast     |
| Gradient mode           | Fast     |
| Excitation              | Non-sel. |
| RF spoiling             | On       |
| Incr. Gradient spoiling | Off      |
| Turbo factor            | 176      |

**Sequence - Special**

|                        |          |
|------------------------|----------|
| Readout polarity       | Positive |
| Readout trajectory     | Bipolar  |
| Gradient spoiling      | Siemens  |
| Gradient moment factor | 1        |
| Averaging              | RMS      |

**Sequence - Assistant**

|      |     |
|------|-----|
| Mode | Off |
|------|-----|

|                                                                                               |
|-----------------------------------------------------------------------------------------------|
| \\Research\\Investigators\\Baker\\Holmes_Yale_McLean_Dec2019_NOEXPIRATION\\t2_tse_dark-fluid_ |
| tra                                                                                           |
| TA: 4:14 PM: REF Voxel size: 0.7×0.7×4.0 mmPAT: Off Rel. SNR: 1.00 : tir                      |

**Properties**

|                                               |                    |
|-----------------------------------------------|--------------------|
| Prio recon                                    | Off                |
| Load images to viewer                         | On                 |
| Inline movie                                  | Off                |
| Auto store images                             | On                 |
| Load images to stamp segments                 | On                 |
| Load images to graphic segments               | Off                |
| Auto open inline display                      | Off                |
| Auto close inline display                     | Off                |
| Start measurement without further preparation | Off                |
| Wait for user to start                        | Off                |
| Start measurements                            | Single measurement |

**Routine**

|                    |                                      |
|--------------------|--------------------------------------|
| Slice group        | 1                                    |
| Slices             | 30                                   |
| Dist. factor       | 25 %                                 |
| Position           | L0.0 P0.0 H0.0 mm                    |
| Orientation        | Transversal                          |
| Phase enc. dir.    | R >> L                               |
| AutoAlign          | Head > Brain                         |
| Phase oversampling | 0 %                                  |
| FoV read           | 220 mm                               |
| FoV phase          | 96.9 %                               |
| Slice thickness    | 4.0 mm                               |
| TR                 | 9000.0 ms                            |
| TE                 | 83.0 ms                              |
| Averages           | 1                                    |
| Concatenations     | 2                                    |
| Filter             | Prescan Normalize, Elliptical filter |
| Coil elements      | HC1-7                                |

**Contrast - Common**

|                          |               |
|--------------------------|---------------|
| TR                       | 9000.0 ms     |
| TE                       | 83.0 ms       |
| TD                       | 0.0 ms        |
| MTC                      | Off           |
| Magn. preparation        | Slice-sel. IR |
| TI                       | 2500 ms       |
| Flip angle               | 150 deg       |
| Fat suppr.               | Fat sat.      |
| Fat sat. mode            | Strong        |
| Water suppr.             | None          |
| Restore magn.            | Off           |
| Freeze suppressed tissue | On            |

**Contrast - Dynamic**

|                 |                  |
|-----------------|------------------|
| Averages        | 1                |
| Averaging mode  | Long term        |
| Reconstruction  | Magnitude        |
| Measurements    | 1                |
| Multiple series | Each measurement |

**Resolution - Common**

|                 |        |
|-----------------|--------|
| FoV read        | 220 mm |
| FoV phase       | 96.9 % |
| Slice thickness | 4.0 mm |
| Base resolution | 320    |

**Resolution - Common**

|                       |           |
|-----------------------|-----------|
| Phase resolution      | 70 %      |
| Phase partial Fourier | Off       |
| Trajectory            | Cartesian |
| Interpolation         | Off       |

**Resolution - iPAT**

|          |      |
|----------|------|
| PAT mode | None |
|----------|------|

**Resolution - Filter Image**

|                   |     |
|-------------------|-----|
| Image Filter      | Off |
| Distortion Corr.  | Off |
| Prescan Normalize | On  |
| Unfiltered images | Off |
| Normalize         | Off |
| B1 filter         | Off |

**Resolution - Filter Rawdata**

|                   |     |
|-------------------|-----|
| Raw filter        | Off |
| Elliptical filter | On  |

**Geometry - Common**

|                  |                   |
|------------------|-------------------|
| Slice group      | 1                 |
| Slices           | 30                |
| Dist. factor     | 25 %              |
| Position         | L0.0 P0.0 H0.0 mm |
| Orientation      | Transversal       |
| Phase enc. dir.  | R >> L            |
| FoV read         | 220 mm            |
| FoV phase        | 96.9 %            |
| Slice thickness  | 4.0 mm            |
| TR               | 9000.0 ms         |
| Multi-slice mode | Interleaved       |
| Series           | Interleaved       |
| Concatenations   | 2                 |

**Geometry - AutoAlign**

|                     |                   |
|---------------------|-------------------|
| Slice group         | 1                 |
| Position            | L0.0 P0.0 H0.0 mm |
| Orientation         | Transversal       |
| Phase enc. dir.     | R >> L            |
| AutoAlign           | Head > Brain      |
| Initial Position    | L0.0 P0.0 F37.0   |
| L                   | 0.0 mm            |
| P                   | 0.0 mm            |
| H                   | 37.0 mm           |
| Initial Rotation    | 90.00 deg         |
| Initial Orientation | Transversal       |

**Geometry - Saturation**

|               |          |
|---------------|----------|
| Fat suppr.    | Fat sat. |
| Fat sat. mode | Strong   |
| Water suppr.  | None     |
| Restore magn. | Off      |
| Special sat.  | None     |

**Geometry - Navigator**

**System - Miscellaneous**

|                     |                      |
|---------------------|----------------------|
| Positioning mode    | REF                  |
| Table position      | H                    |
| Table position      | 37 mm                |
| MSMA                | S - C - T            |
| Sagittal            | R >> L               |
| Coronal             | A >> P               |
| Transversal         | F >> H               |
| Coil Combine Mode   | Adaptive Combine     |
| Save uncombined     | Off                  |
| Matrix Optimization | Off                  |
| AutoAlign           | Head > Brain         |
| Coil Select Mode    | Off - AutoCoilSelect |

**System - Adjustments**

|                          |          |
|--------------------------|----------|
| B0 Shim mode             | Standard |
| B1 Shim mode             | TrueForm |
| Adjust with body coil    | On       |
| Confirm freq. adjustment | Off      |
| Assume Dominant Fat      | Off      |
| Assume Silicone          | Off      |
| Adjustment Tolerance     | Auto     |

**System - Adjust Volume**

|             |                   |
|-------------|-------------------|
| Position    | L0.0 P0.0 H0.0 mm |
| Orientation | Transversal       |
| Rotation    | 90.00 deg         |
| R >> L      | 214 mm            |
| A >> P      | 220 mm            |
| F >> H      | 149 mm            |
| Reset       | Off               |

**System - pTx Volumes**

|              |          |
|--------------|----------|
| B1 Shim mode | TrueForm |
|--------------|----------|

**System - Tx/Rx**

|                     |                |
|---------------------|----------------|
| Frequency 1H        | 123.261582 MHz |
| Correction factor   | 1              |
| Gain                | High           |
| Img. Scale Cor.     | 1.000          |
| Reset               | Off            |
| ? Ref. amplitude 1H | 0.000 V        |

**Physio - Signal1**

|                 |           |
|-----------------|-----------|
| 1st Signal/Mode | None      |
| TR              | 9000.0 ms |
| Concatenations  | 2         |

**Physio - Cardiac**

|                   |               |
|-------------------|---------------|
| Magn. preparation | Slice-sel. IR |
| TI                | 2500 ms       |
| Fat suppr.        | Fat sat.      |
| Dark blood        | Off           |
| FoV read          | 220 mm        |
| FoV phase         | 96.9 %        |
| Phase resolution  | 70 %          |
| Trajectory        | Cartesian     |

**Physio - PACE**

|                |     |
|----------------|-----|
| Resp. control  | Off |
| Concatenations | 2   |

**Inline - Common**

|          |     |
|----------|-----|
| Subtract | Off |
|----------|-----|

**Inline - Common**

|                      |     |
|----------------------|-----|
| Measurements         | 1   |
| StdDev               | Off |
| Save original images | On  |

**Inline - MIP**

|                      |     |
|----------------------|-----|
| MIP-Sag              | Off |
| MIP-Cor              | Off |
| MIP-Tra              | Off |
| MIP-Time             | Off |
| Save original images | On  |

**Inline - Composing**

|                  |     |
|------------------|-----|
| Distortion Corr. | Off |
|------------------|-----|

**Sequence - Part 1**

|                     |             |
|---------------------|-------------|
| Introduction        | On          |
| Dimension           | 2D          |
| Compensate T2 decay | Off         |
| Reduce Motion Sens. | On          |
| Contrasts           | 1           |
| Flow comp.          | No          |
| Multi-slice mode    | Interleaved |
| Free echo spacing   | Off         |
| Echo spacing        | 8.28 ms     |
| Bandwidth           | 289 Hz/Px   |

**Sequence - Part 2**

|                          |              |
|--------------------------|--------------|
| Define                   | Turbo factor |
| Echo trains per slice    | 13           |
| Phase correction         | Automatic    |
| Acoustic noise reduction | None         |
| RF pulse type            | Normal       |
| Gradient mode            | Performance  |
| Hyperecho                | Off          |
| WARP                     | Off          |
| Red. EC sensitivity      | Off          |
| Turbo factor             | 17           |

**Sequence - Assistant**

|               |      |
|---------------|------|
| Mode          | Off  |
| Allowed delay | 60 s |

\\Research\\Investigators\\Baker\\Holmes\_Yale\_McLean\_Dec2019\_NOEXPIRATION\\pd+t2\_tse\_tra

TA: 2:11 PM: FIX Voxel size: 0.3×0.3×4.0 mmPAT: 2 Rel. SNR: 1.00 : tse

**Properties**

|                                               |                    |
|-----------------------------------------------|--------------------|
| Prio recon                                    | Off                |
| Load images to viewer                         | On                 |
| Inline movie                                  | Off                |
| Auto store images                             | On                 |
| Load images to stamp segments                 | Off                |
| Load images to graphic segments               | Off                |
| Auto open inline display                      | Off                |
| Auto close inline display                     | Off                |
| Start measurement without further preparation | Off                |
| Wait for user to start                        | Off                |
| Start measurements                            | Single measurement |

**Routine**

|                    |                                      |
|--------------------|--------------------------------------|
| Slice group        | 1                                    |
| Slices             | 30                                   |
| Dist. factor       | 25 %                                 |
| Position           | L0.0 P0.0 H0.0 mm                    |
| Orientation        | Transversal                          |
| Phase enc. dir.    | R >> L                               |
| AutoAlign          | Head > Brain                         |
| Phase oversampling | 0 %                                  |
| FoV read           | 220 mm                               |
| FoV phase          | 100.0 %                              |
| Slice thickness    | 4.0 mm                               |
| TR                 | 3600.0 ms                            |
| TE 1               | 9.4 ms                               |
| TE 2               | 94 ms                                |
| Averages           | 1                                    |
| Concatenations     | 1                                    |
| Filter             | Prescan Normalize, Elliptical filter |
| Coil elements      | HC1-7                                |

**Contrast - Common**

|                   |           |
|-------------------|-----------|
| TR                | 3600.0 ms |
| TE 1              | 9.4 ms    |
| TE 2              | 94 ms     |
| MTC               | Off       |
| Magn. preparation | None      |
| Flip angle        | 160 deg   |
| Fat suppr.        | None      |
| Water suppr.      | None      |
| Restore magn.     | Off       |

**Contrast - Dynamic**

|                 |                  |
|-----------------|------------------|
| Averages        | 1                |
| Averaging mode  | Long term        |
| Reconstruction  | Magnitude        |
| Measurements    | 1                |
| Multiple series | Each measurement |

**Resolution - Common**

|                       |           |
|-----------------------|-----------|
| FoV read              | 220 mm    |
| FoV phase             | 100.0 %   |
| Slice thickness       | 4.0 mm    |
| Base resolution       | 320       |
| Phase resolution      | 100 %     |
| Phase partial Fourier | Off       |
| Trajectory            | Cartesian |

**Resolution - Common**

|               |    |
|---------------|----|
| Interpolation | On |
|---------------|----|

**Resolution - iPAT**

|                     |            |
|---------------------|------------|
| PAT mode            | GRAPPA     |
| Accel. factor PE    | 2          |
| Ref. lines PE       | 30         |
| Reference scan mode | Integrated |

**Resolution - Filter Image**

|                   |     |
|-------------------|-----|
| Image Filter      | Off |
| Distortion Corr.  | Off |
| Prescan Normalize | On  |
| Unfiltered images | Off |
| Normalize         | Off |
| B1 filter         | Off |

**Resolution - Filter Rawdata**

|                   |     |
|-------------------|-----|
| Raw filter        | Off |
| Elliptical filter | On  |

**Geometry - Common**

|                  |                   |
|------------------|-------------------|
| Slice group      | 1                 |
| Slices           | 30                |
| Dist. factor     | 25 %              |
| Position         | L0.0 P0.0 H0.0 mm |
| Orientation      | Transversal       |
| Phase enc. dir.  | R >> L            |
| FoV read         | 220 mm            |
| FoV phase        | 100.0 %           |
| Slice thickness  | 4.0 mm            |
| TR               | 3600.0 ms         |
| Multi-slice mode | Interleaved       |
| Series           | Interleaved       |
| Concatenations   | 1                 |

**Geometry - AutoAlign**

|                     |                   |
|---------------------|-------------------|
| Slice group         | 1                 |
| Position            | L0.0 P0.0 H0.0 mm |
| Orientation         | Transversal       |
| Phase enc. dir.     | R >> L            |
| AutoAlign           | Head > Brain      |
| Initial Position    | L0.0 P0.0 F37.0   |
| L                   | 0.0 mm            |
| P                   | 0.0 mm            |
| H                   | 37.0 mm           |
| Initial Rotation    | 90.00 deg         |
| Initial Orientation | Transversal       |

**Geometry - Saturation**

|               |      |
|---------------|------|
| Fat suppr.    | None |
| Water suppr.  | None |
| Restore magn. | Off  |
| Special sat.  | None |

**Geometry - Navigator****System - Miscellaneous**

|                  |     |
|------------------|-----|
| Positioning mode | FIX |
| Table position   | H   |

**System - Miscellaneous**

|                     |                      |
|---------------------|----------------------|
| Table position      | 37 mm                |
| MSMA                | S - C - T            |
| Sagittal            | R >> L               |
| Coronal             | A >> P               |
| Transversal         | F >> H               |
| Coil Combine Mode   | Adaptive Combine     |
| Save uncombined     | Off                  |
| Matrix Optimization | Off                  |
| AutoAlign           | Head > Brain         |
| Coil Select Mode    | Off - AutoCoilSelect |

**System - Adjustments**

|                          |          |
|--------------------------|----------|
| B0 Shim mode             | Tune up  |
| B1 Shim mode             | TrueForm |
| Adjust with body coil    | On       |
| Confirm freq. adjustment | Off      |
| Assume Dominant Fat      | Off      |
| Assume Silicone          | Off      |
| Adjustment Tolerance     | Auto     |

**System - Adjust Volume**

|             |             |
|-------------|-------------|
| Position    | Isocenter   |
| Orientation | Transversal |
| Rotation    | 0.00 deg    |
| A >> P      | 263 mm      |
| R >> L      | 350 mm      |
| F >> H      | 350 mm      |
| Reset       | Off         |

**System - pTx Volumes**

|              |          |
|--------------|----------|
| B1 Shim mode | TrueForm |
|--------------|----------|

**System - Tx/Rx**

|                     |                |
|---------------------|----------------|
| Frequency 1H        | 123.261582 MHz |
| Correction factor   | 1              |
| Gain                | High           |
| Img. Scale Cor.     | 1.000          |
| Reset               | Off            |
| ? Ref. amplitude 1H | 0.000 V        |

**Physio - Signal1**

|                 |           |
|-----------------|-----------|
| 1st Signal/Mode | None      |
| TR              | 3600.0 ms |
| Concatenations  | 1         |

**Physio - Cardiac**

|                   |           |
|-------------------|-----------|
| Magn. preparation | None      |
| Fat suppr.        | None      |
| Dark blood        | Off       |
| FoV read          | 220 mm    |
| FoV phase         | 100.0 %   |
| Phase resolution  | 100 %     |
| Trajectory        | Cartesian |

**Physio - PACE**

|                |     |
|----------------|-----|
| Resp. control  | Off |
| Concatenations | 1   |

**Inline - Common**

|                      |     |
|----------------------|-----|
| Subtract             | Off |
| Measurements         | 1   |
| StdDev               | Off |
| Save original images | On  |

**Inline - MIP**

|                      |     |
|----------------------|-----|
| MIP-Sag              | Off |
| MIP-Cor              | Off |
| MIP-Tra              | Off |
| MIP-Time             | Off |
| Save original images | On  |

**Inline - Composing**

|                  |     |
|------------------|-----|
| Distortion Corr. | Off |
|------------------|-----|

**Sequence - Part 1**

|                     |             |
|---------------------|-------------|
| Introduction        | On          |
| Dimension           | 2D          |
| Compensate T2 decay | Off         |
| Reduce Motion Sens. | On          |
| Contrasts           | 2           |
| Flow comp.          | No          |
| Multi-slice mode    | Interleaved |
| Free echo spacing   | Off         |
| Echo spacing        | 9.36 ms     |
| Bandwidth           | 252 Hz/Px   |

**Sequence - Part 2**

|                          |              |
|--------------------------|--------------|
| Define                   | Turbo factor |
| Echo trains per slice    | 35           |
| Phase correction         | Automatic    |
| Acoustic noise reduction | None         |
| RF pulse type            | Normal       |
| Gradient mode            | Normal       |
| Hyperecho                | Off          |
| WARP                     | Off          |
| Red. EC sensitivity      | Off          |
| Turbo factor             | 5            |

**Sequence - Assistant**

|                |                |
|----------------|----------------|
| Mode           | Min flip angle |
| Min flip angle | 130 deg        |
| Allowed delay  | 60 s           |

\\Research\\Investigators\\Baker\\Holmes\_Yale\_McLean\_Dec2019\_NOEXPIRATION\\resolve\_4scan\_trace\_tra\_p2\_192

TA: 1:51 PM: REF Voxel size: 1.1×1.1×4.0 mmPAT: 2 Rel. SNR: 1.00 : resolve

### Properties

|                                               |                    |
|-----------------------------------------------|--------------------|
| Prio recon                                    | Off                |
| Load images to viewer                         | On                 |
| Inline movie                                  | Off                |
| Auto store images                             | On                 |
| Load images to stamp segments                 | Off                |
| Load images to graphic segments               | Off                |
| Auto open inline display                      | Off                |
| Auto close inline display                     | Off                |
| Start measurement without further preparation | Off                |
| Wait for user to start                        | Off                |
| Start measurements                            | Single measurement |

### Routine

|                    |                                  |
|--------------------|----------------------------------|
| Slice group        | 1                                |
| Slices             | 30                               |
| Dist. factor       | 25 %                             |
| Position           | L0.0 P0.0 H0.0 mm                |
| Orientation        | Transversal                      |
| Phase enc. dir.    | A >> P                           |
| AutoAlign          | Head > Brain                     |
| Phase oversampling | 0 %                              |
| FoV read           | 220 mm                           |
| FoV phase          | 100.0 %                          |
| Slice thickness    | 4.0 mm                           |
| TR                 | 4040 ms                          |
| TE 1               | 55 ms                            |
| TE 2               | 93 ms                            |
| Concatenations     | 1                                |
| Filter             | Raw filter, Prescan<br>Normalize |
| Coil elements      | HC1-7;NC1,2                      |

### Contrast - Common

|                   |          |
|-------------------|----------|
| TR                | 4040 ms  |
| TE 1              | 55 ms    |
| TE 2              | 93 ms    |
| MTC               | Off      |
| Magn. preparation | None     |
| Flip angle        | 180 deg  |
| Fat suppr.        | Fat sat. |
| Fat sat. mode     | Strong   |

### Contrast - Dynamic

|                |            |
|----------------|------------|
| Averaging mode | Short term |
| Reconstruction | Magnitude  |
| Measurements   | 1          |

### Resolution - Common

|                         |         |
|-------------------------|---------|
| FoV read                | 220 mm  |
| FoV phase               | 100.0 % |
| Slice thickness         | 4.0 mm  |
| Base resolution         | 192     |
| Phase resolution        | 100 %   |
| Phase partial Fourier   | Off     |
| Readout partial Fourier | 5/8     |
| Readout segments        | 7       |
| Interpolation           | Off     |

### Resolution - iPAT

|                     |              |
|---------------------|--------------|
| PAT mode            | GRAPPA       |
| Accel. factor PE    | 2            |
| Ref. lines PE       | 96           |
| Reference scan mode | EPI/separate |

### Resolution - Filter Image

|                   |     |
|-------------------|-----|
| Distortion Corr.  | Off |
| Prescan Normalize | On  |
| Unfiltered images | Off |

### Resolution - Filter Rawdata

|            |    |
|------------|----|
| Raw filter | On |
|------------|----|

### Geometry - Common

|                  |                   |
|------------------|-------------------|
| Slice group      | 1                 |
| Slices           | 30                |
| Dist. factor     | 25 %              |
| Position         | L0.0 P0.0 H0.0 mm |
| Orientation      | Transversal       |
| Phase enc. dir.  | A >> P            |
| FoV read         | 220 mm            |
| FoV phase        | 100.0 %           |
| Slice thickness  | 4.0 mm            |
| TR               | 4040 ms           |
| Multi-slice mode | Interleaved       |
| Series           | Interleaved       |
| Concatenations   | 1                 |

### Geometry - AutoAlign

|                     |                   |
|---------------------|-------------------|
| Slice group         | 1                 |
| Position            | L0.0 P0.0 H0.0 mm |
| Orientation         | Transversal       |
| Phase enc. dir.     | A >> P            |
| AutoAlign           | Head > Brain      |
| Initial Position    | L0.0 P0.0 F37.0   |
| L                   | 0.0 mm            |
| P                   | 0.0 mm            |
| H                   | 37.0 mm           |
| Initial Rotation    | 0.00 deg          |
| Initial Orientation | Transversal       |

### Geometry - Saturation

|               |          |
|---------------|----------|
| Fat suppr.    | Fat sat. |
| Fat sat. mode | Strong   |
| Special sat.  | None     |

### System - Miscellaneous

|                     |                      |
|---------------------|----------------------|
| Positioning mode    | REF                  |
| Table position      | H                    |
| Table position      | 37 mm                |
| MSMA                | S - C - T            |
| Sagittal            | R >> L               |
| Coronal             | A >> P               |
| Transversal         | F >> H               |
| Coil Combine Mode   | Adaptive Combine     |
| Save uncombined     | Off                  |
| Matrix Optimization | Off                  |
| AutoAlign           | Head > Brain         |
| Coil Select Mode    | Off - AutoCoilSelect |



**System - Adjustments**

|                          |          |
|--------------------------|----------|
| B0 Shim mode             | Standard |
| B1 Shim mode             | TrueForm |
| Adjust with body coil    | On       |
| Confirm freq. adjustment | Off      |
| Assume Dominant Fat      | Off      |
| Assume Silicone          | Off      |
| Adjustment Tolerance     | Auto     |

**System - Adjust Volume**

|             |                   |
|-------------|-------------------|
| Position    | L0.0 P0.0 H0.0 mm |
| Orientation | Transversal       |
| Rotation    | 0.00 deg          |
| A >> P      | 220 mm            |
| R >> L      | 220 mm            |
| F >> H      | 149 mm            |
| Reset       | Off               |

**System - pTx Volumes**

|              |          |
|--------------|----------|
| B1 Shim mode | TrueForm |
|--------------|----------|

**System - Tx/Rx**

|                     |                |
|---------------------|----------------|
| Frequency 1H        | 123.261582 MHz |
| Correction factor   | 1              |
| Gain                | High           |
| Img. Scale Cor.     | 1.000          |
| Reset               | Off            |
| ? Ref. amplitude 1H | 0.000 V        |

**Physio - Signal1**

|                 |         |
|-----------------|---------|
| 1st Signal/Mode | None    |
| TR              | 4040 ms |
| Concatenations  | 1       |

**Diff - Neuro**

|                       |                        |
|-----------------------|------------------------|
| Diffusion mode        | 4-Scan Trace           |
| Diff. directions      | 4                      |
| Diffusion Scheme      | Monopolar              |
| Diff. weightings      | 2                      |
| b-value 1             | 0 s/mm <sup>2</sup>    |
| b-value 2             | 1000 s/mm <sup>2</sup> |
| b-value 1             | 1                      |
| b-value 2             | 1                      |
| Diff. weighted images | Off                    |
| Trace weighted images | On                     |
| ADC maps              | On                     |
| FA maps               | Off                    |
| Mosaic                | Off                    |
| Tensor                | Off                    |
| Noise level           | 100                    |

**Diff - Body**

|                       |                        |
|-----------------------|------------------------|
| Diffusion mode        | 4-Scan Trace           |
| Diff. directions      | 4                      |
| Diffusion Scheme      | Monopolar              |
| Diff. weightings      | 2                      |
| b-value 1             | 0 s/mm <sup>2</sup>    |
| b-value 2             | 1000 s/mm <sup>2</sup> |
| b-value 1             | 1                      |
| b-value 2             | 1                      |
| Diff. weighted images | Off                    |
| Trace weighted images | On                     |
| ADC maps              | On                     |
| Exponential ADC Maps  | Off                    |
| FA maps               | Off                    |

**Diff - Body**

|                   |                     |
|-------------------|---------------------|
| Invert Gray Scale | Off                 |
| Calculated Image  | Off                 |
| b-Value >=        | 0 s/mm <sup>2</sup> |
| Noise level       | 100                 |

**Diff - Composing**

|                  |     |
|------------------|-----|
| Distortion Corr. | Off |
|------------------|-----|

**Sequence - Part 1**

|                  |             |
|------------------|-------------|
| Introduction     | On          |
| Dimension        | 2D          |
| Contrasts        | 2           |
| Optimization     | Min. TE     |
| Multi-slice mode | Interleaved |
| Echo spacing     | 0.32 ms     |
| Bandwidth        | 766 Hz/Px   |

**Sequence - Part 2**

|                    |        |
|--------------------|--------|
| EPI factor         | 96     |
| RF pulse type      | Normal |
| Gradient mode      | Fast   |
| Reacquisition mode | On     |

**Sequence - Assistant**

|      |     |
|------|-----|
| Mode | Off |
|------|-----|
